# Supplementary material for: Theoretical studies on the mechanism and stereoselectivity of Rh(Phebox)-catalyzed asymmetric reductive aldol reaction
Source: Royal Society of Chemistry journal article supplement (doi:10.1039/c1ob05501a), 2011-01-01
Supplement: c1ob05501a.pdf [file c1ob05501a.pdf]

## Theoretical Studies on the Mechanism and Stereoselectivity of Rh(Phebox)-catalyzed Asymmetric Reductive Aldol Reaction

Yun-Fang Yang,<sup>a</sup> Ting Shi,<sup>a,b</sup> Xin-Hao Zhang,<sup>a</sup> Zong-Xun Tang,<sup>b</sup> Zhen-Yi Wen,<sup>b</sup>  
Jun-Min Quan,<sup>a</sup> and Yun-Dong Wu<sup>\*a,c,d</sup>

<sup>a</sup> School of Chemical Biology and Biotechnology, Shenzhen Graduate School of Peking University, Shenzhen 518055, China.

<sup>b</sup> Department of Chemistry, Northwest University, Xi'an 710069, China.

<sup>c</sup> Department of Chemistry, The Hong Kong University of Science & Technology, Clear Water Bay, Kowloon, Hong Kong, China. E-mail: [chydwu@ust.hk](mailto:chydwu@ust.hk)

<sup>d</sup> College of Chemistry, Peking University, Beijing 100871, China

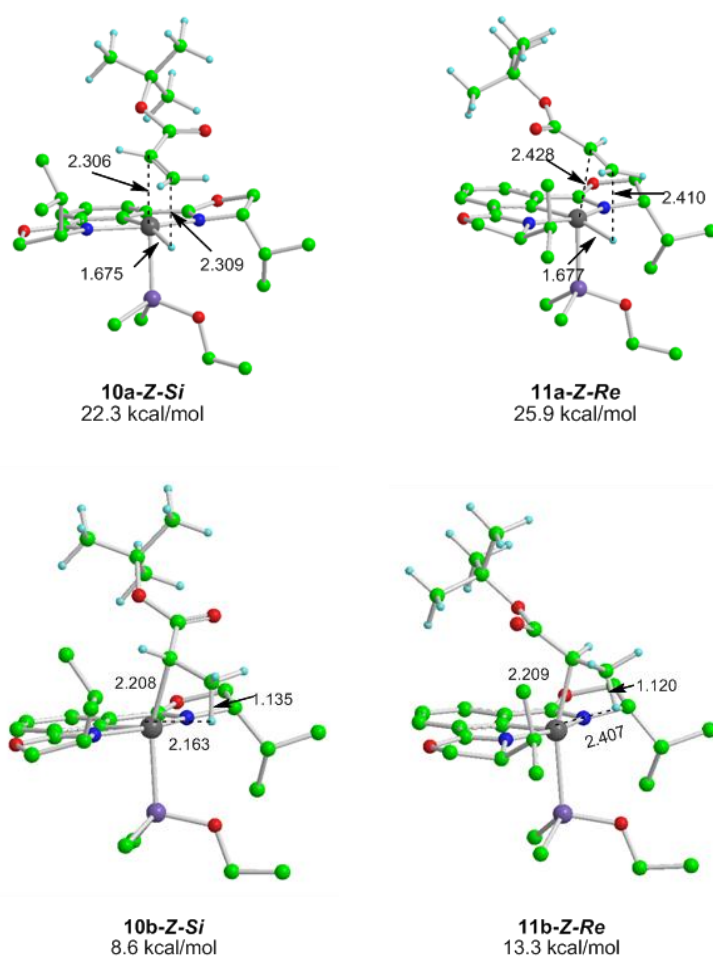

**Figure S1.** Optimized structures of **10a**, **11a**, **10b** and **11b**, and hydrogen atoms of Rh(Phebox-ip)

are omitted for clarity; Distances are in angstrom( $\text{\AA}$ ).

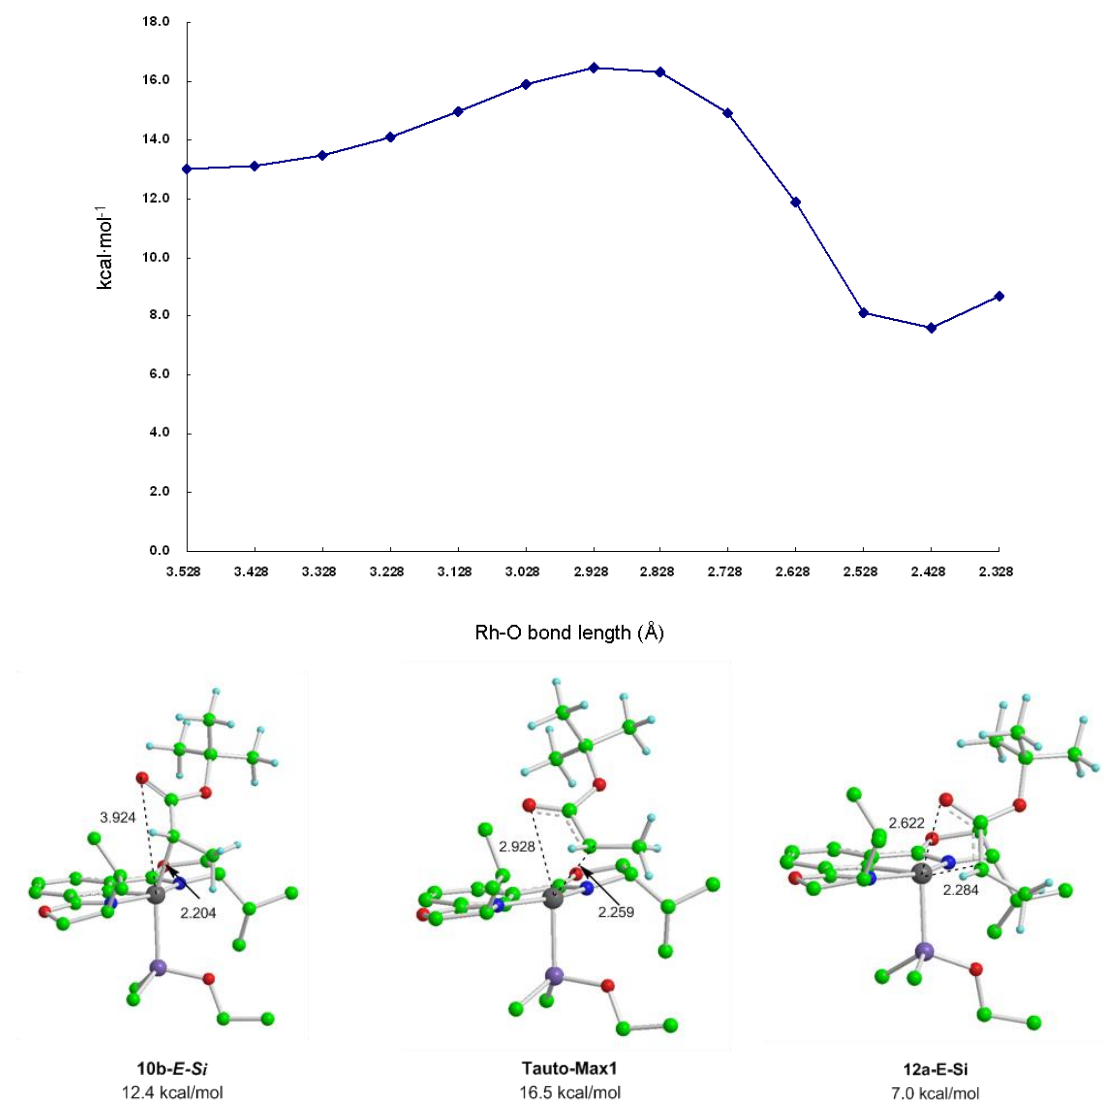

**Figure S2.** Relative electron energy changes along the Rh-O bond length and structure of **10b-E-Si**, **Tauto-Max1** and **12a-E-Si** on the surface.

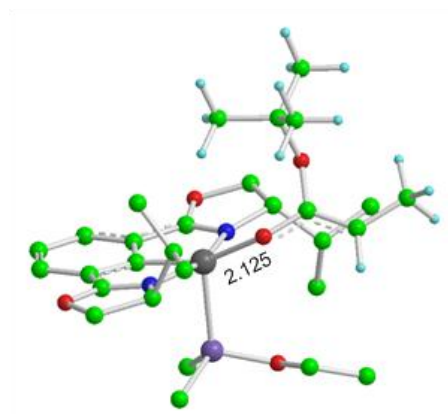

**13b-E-Si**  
9.7 kcal/mol

**Figure S3.** Optimized structure of **13b-E-Si**.

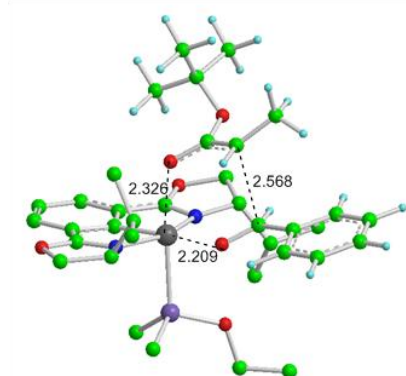

**14a-E-Si-Si**  
18.0 kcal/mol

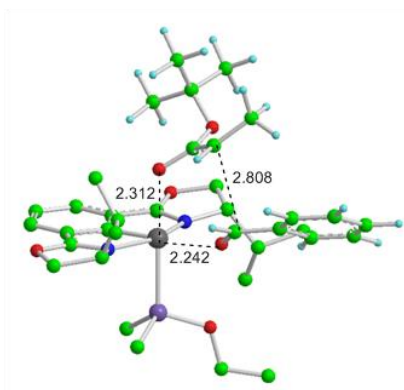

**14a-E-Si-Re**  
23.2 kcal/mol

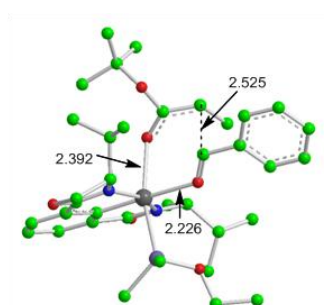

**14TS-Z-Si-Re**  
26.6 kcal/mol

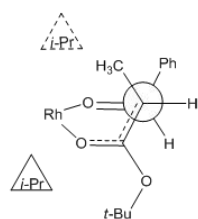

**14TS-Z-Si-Re (Staggered)**

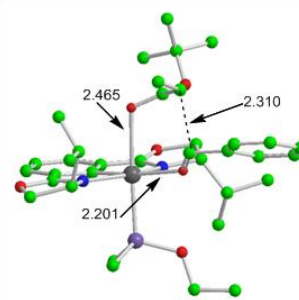

**15TS-Z-Re-Re**  
28.7 kcal/mol

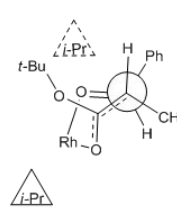

**15TS-Z-Re-Re (Eclipsed)**

**Figure S4.** Optimized structures of **14a**, **14TS-Z-Si-Re** and **15TS-Z-Re-Re** and their corresponding Newman projections. All hydrogen atoms are omitted for clarity and distances are in angstrom ( $\text{\AA}$ ).

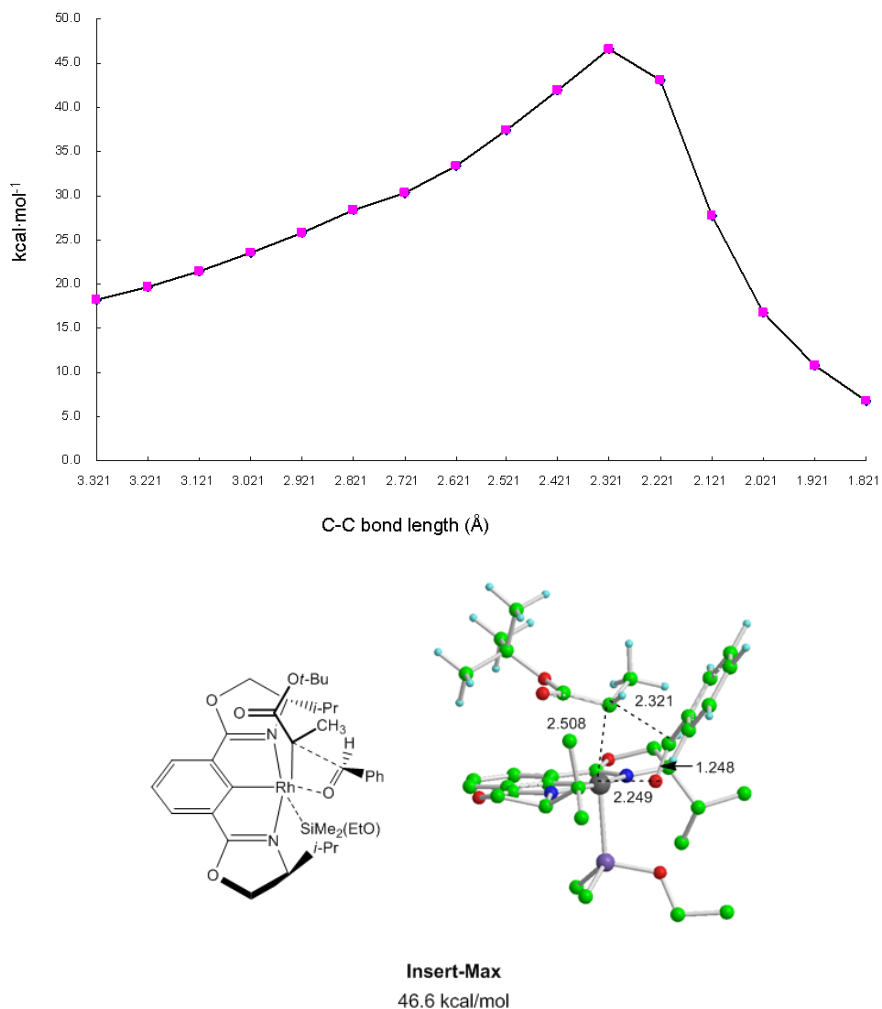

**Figure S5.** Relative electron energy changes along the C<sup>δ+</sup>-C<sup>δ-</sup> bond length in reaction between Rh bound C-enolate and aldehyde. Structures of **Insert-Max**. and hydrogen atoms of Rh(Phebox-ip) are ignored for clarity; Distances are in angstrom (Å).

**P. S.** Scanned energy is electronic energy. But all the energies we discussed in our manuscript is Gibbs free energy. In order to facilitate our analysis, we take the electronic energy difference as Gibbs free energy difference as an approximation.

An alternative pathway is the C-enolate species reacting directly with the rhodium-bound aldehyde. Such pathway is relevant in rhodium(I) mediated arylation of aldehydes with arylboronic acids under base and water free conditions.<sup>30</sup> Since this four-membered ring transition state structure has large steric congestion, every time we try to locate it failed. It goes easily to



|                           |           |          |           |                           |           |               |           |
|---------------------------|-----------|----------|-----------|---------------------------|-----------|---------------|-----------|
| H                         | -1.125602 | 2.099268 | 0.542768  | 0                         | -2.847598 | -0.396032     | -0.000103 |
| C                         | -4.836355 | 0.828510 | -1.305906 | Total SCF energy          |           | -345.56649002 |           |
| H                         | -5.451959 | 0.395409 | -2.095851 | Gibbs free energy at 298K |           | -345.48672200 |           |
| H                         | -5.465995 | 1.204887 | -0.494351 | Free energy in solution   |           | -345.56772700 |           |
| H                         | -4.239831 | 1.656841 | -1.700018 |                           |           |               |           |
| Total SCF energy          |           |          |           |                           |           | -834.56859968 |           |
| Gibbs free energy at 298K |           |          |           |                           |           | -834.38008400 |           |

| <b>3a</b>             |           |           |           | <b>4a</b>             |           |           |           |
|-----------------------|-----------|-----------|-----------|-----------------------|-----------|-----------|-----------|
| Cartesian coordinates |           |           |           | Cartesian coordinates |           |           |           |
| ATOM                  | X         | Y         | Z         | ATOM                  | X         | Y         | Z         |
| C                     | -1.290957 | 0.566795  | 0.155687  | C                     | 0.445922  | 1.019821  | 0.006291  |
| C                     | -1.905339 | 1.250444  | -0.908839 | C                     | -0.119841 | 1.608153  | 1.152580  |
| C                     | -2.752128 | 2.336481  | -0.636321 | C                     | -0.270205 | 3.002435  | 1.201040  |
| C                     | -2.972546 | 2.714554  | 0.697521  | C                     | 0.154996  | 3.778453  | 0.111162  |
| C                     | -2.372064 | 2.029734  | 1.764610  | C                     | 0.737331  | 3.195716  | -1.022816 |
| C                     | -1.524528 | 0.943829  | 1.489893  | C                     | 0.889745  | 1.799936  | -1.076203 |
| H                     | -3.243282 | 2.887936  | -1.436325 | H                     | -0.705557 | 3.492976  | 2.069548  |
| H                     | -3.630036 | 3.553065  | 0.908774  | H                     | 0.039000  | 4.857506  | 0.152247  |
| H                     | -2.575028 | 2.347159  | 2.786038  | H                     | 1.068061  | 3.831116  | -1.842134 |
| C                     | -1.541644 | 0.646455  | -2.181703 | C                     | -0.449845 | 0.597516  | 2.143218  |
| N                     | -0.754200 | -0.392736 | -2.138362 | N                     | -0.144247 | -0.633204 | 1.843241  |
| C                     | -0.817122 | 0.058692  | 2.400797  | C                     | 1.495341  | 0.970989  | -2.100116 |
| N                     | -0.115742 | -0.904551 | 1.866338  | N                     | 1.542425  | -0.313923 | -1.868140 |
| Rh                    | -0.115792 | -0.989698 | -0.233979 | Rh                    | 0.709084  | -0.945037 | -0.035775 |
| Si                    | -1.635417 | -2.787187 | -0.216865 | Si                    | 2.907366  | -0.836133 | 0.966766  |
| H                     | 0.726347  | -2.433753 | -0.576082 | H                     | 1.352019  | -2.486047 | 0.146200  |
| H                     | 2.575939  | -1.979554 | 0.343283  | H                     | -0.995839 | -3.218641 | 0.089481  |
| C                     | 3.540748  | -1.618775 | 0.700045  | C                     | -0.667747 | -2.650031 | -0.773654 |
| C                     | 3.891148  | -0.333979 | 0.579253  | C                     | -1.312937 | -1.455316 | -1.088675 |
| H                     | 4.222028  | -2.337896 | 1.147466  | H                     | -0.134879 | -3.200707 | -1.539100 |
| H                     | 4.855247  | 0.040086  | 0.911710  | H                     | -1.218773 | -1.018531 | -2.076547 |
| C                     | 2.997481  | 0.663189  | -0.047882 | C                     | -2.439988 | -0.959274 | -0.273616 |
| O                     | 1.856523  | 0.488326  | -0.450793 | O                     | -2.819177 | -1.407210 | 0.794841  |
| O                     | 3.613161  | 1.859807  | -0.146386 | O                     | -3.052444 | 0.086566  | -0.890126 |
| C                     | 2.843626  | 2.914584  | -0.744360 | H                     | -0.929470 | 0.836435  | 3.094251  |
| H                     | 1.918644  | 3.079763  | -0.185762 | H                     | 1.916351  | 1.387273  | -3.018152 |
| H                     | 3.481529  | 3.797966  | -0.705330 | H                     | 3.979715  | -1.379403 | 0.080782  |
| H                     | 2.594417  | 2.666752  | -1.779839 | H                     | 3.013178  | -1.567599 | 2.263025  |
| H                     | -1.325174 | -3.824220 | 0.812666  | H                     | 3.315616  | 0.573733  | 1.267742  |
| H                     | -3.033455 | -2.335107 | 0.095747  | H                     | 2.002548  | -0.874274 | -2.582234 |
| H                     | -1.737921 | -3.493564 | -1.528540 | H                     | -0.411546 | -1.340730 | 2.522847  |
| H                     | -0.874599 | 0.169119  | 3.486852  | C                     | -4.182540 | 0.627859  | -0.197826 |
| H                     | -1.915484 | 1.024011  | -3.137085 | H                     | -4.566438 | 1.423403  | -0.838005 |

|                           |           |               |           |                           |           |               |           |
|---------------------------|-----------|---------------|-----------|---------------------------|-----------|---------------|-----------|
| H                         | -0.526267 | -0.814470     | -3.035887 | H                         | -4.946125 | -0.139419     | -0.040365 |
| H                         | 0.345632  | -1.526338     | 2.526871  | H                         | -3.885422 | 1.032948      | 0.773840  |
| Total SCF energy          |           | -840.80762382 |           | Total SCF energy          |           | -840.82197468 |           |
| Gibbs free energy at 298K |           | -840.59388300 |           | Gibbs free energy at 298K |           | -840.60467900 |           |

| 5a                    |           |           |           | 6a                    |           |           |           |
|-----------------------|-----------|-----------|-----------|-----------------------|-----------|-----------|-----------|
| Cartesian coordinates |           |           |           | Cartesian coordinates |           |           |           |
| ATOM                  | X         | Y         | Z         | ATOM                  | X         | Y         | Z         |
| C                     | 1.660730  | 0.261044  | -0.158192 | C                     | 0.839163  | -0.992632 | 0.176713  |
| C                     | 1.967273  | 1.532837  | 0.362459  | C                     | 1.629916  | -0.640795 | 1.282762  |
| C                     | 3.273829  | 2.026348  | 0.229873  | C                     | 2.930618  | -1.159046 | 1.379370  |
| C                     | 4.245221  | 1.240190  | -0.410266 | C                     | 3.400776  | -2.026920 | 0.381106  |
| C                     | 3.945460  | -0.032894 | -0.913806 | C                     | 2.597086  | -2.403529 | -0.703931 |
| C                     | 2.638777  | -0.533819 | -0.783281 | C                     | 1.294575  | -1.886229 | -0.805129 |
| H                     | 3.548398  | 3.005799  | 0.616658  | H                     | 3.577634  | -0.906368 | 2.217147  |
| H                     | 5.255684  | 1.625360  | -0.510596 | H                     | 4.407357  | -2.427056 | 0.458846  |
| H                     | 4.727905  | -0.617595 | -1.393744 | H                     | 2.988514  | -3.095500 | -1.447040 |
| C                     | 0.793642  | 2.136174  | 0.971794  | C                     | 0.898865  | 0.232879  | 2.189096  |
| N                     | -0.286765 | 1.409137  | 0.991652  | N                     | -0.333098 | 0.502690  | 1.871918  |
| C                     | 2.095083  | -1.820807 | -1.170642 | C                     | 0.256806  | -2.161446 | -1.783560 |
| N                     | 0.838528  | -2.040857 | -0.887307 | N                     | -0.893102 | -1.573644 | -1.606709 |
| Rh                    | -0.166283 | -0.466365 | 0.095155  | Rh                    | -1.038042 | -0.343021 | 0.098398  |
| Si                    | 0.396986  | -1.483976 | 2.228136  | Si                    | -3.517774 | -0.459172 | 0.521998  |
| H                     | -1.446578 | -1.294848 | 0.807404  | H                     | -1.327759 | -1.652380 | 0.927296  |
| H                     | -0.757044 | 1.564275  | -1.735293 | H                     | -2.173528 | 2.268151  | -0.044058 |
| C                     | -0.839629 | 0.491481  | -1.870759 | C                     | -1.880682 | 1.595026  | -0.842670 |
| C                     | -1.941087 | -0.189514 | -1.360646 | C                     | -0.535197 | 1.514933  | -1.204210 |
| H                     | -0.239650 | 0.046473  | -2.656763 | H                     | -2.648657 | 1.340080  | -1.564194 |
| H                     | -2.206073 | -1.174295 | -1.727537 | H                     | -0.246110 | 1.106687  | -2.166405 |
| C                     | -3.009513 | 0.524299  | -0.620161 | C                     | 0.491581  | 2.339177  | -0.536031 |
| O                     | -2.937541 | 1.651554  | -0.154686 | O                     | 0.348146  | 3.009604  | 0.471936  |
| O                     | -4.130131 | -0.228948 | -0.546754 | O                     | 1.667074  | 2.284681  | -1.218761 |
| H                     | 0.792061  | 3.149512  | 1.378761  | H                     | 1.346428  | 0.649860  | 3.093153  |
| H                     | 2.700034  | -2.589429 | -1.657215 | H                     | 0.411374  | -2.843596 | -2.622775 |
| H                     | 0.263721  | -2.970996 | 2.232810  | H                     | -4.291017 | -0.680012 | -0.749019 |
| H                     | -0.411386 | -0.978522 | 3.375195  | H                     | -4.137883 | 0.765341  | 1.129794  |
| H                     | 1.824577  | -1.214255 | 2.596832  | H                     | -3.967129 | -1.571371 | 1.417347  |
| H                     | 0.484761  | -2.962603 | -1.133870 | H                     | -1.618032 | -1.798538 | -2.284948 |
| H                     | -1.144310 | 1.842065  | 1.328722  | H                     | -0.825500 | 1.146905  | 2.485466  |
| C                     | -5.215407 | 0.351605  | 0.187041  | C                     | 2.729376  | 3.073257  | -0.672151 |
| H                     | -6.033429 | -0.366399 | 0.117330  | H                     | 3.569541  | 2.950523  | -1.357166 |
| H                     | -4.932766 | 0.505375  | 1.232744  | H                     | 2.438915  | 4.125690  | -0.606533 |
| H                     | -5.508222 | 1.311711  | -0.246694 | H                     | 3.000910  | 2.720276  | 0.327127  |

|                           |               |                           |               |
|---------------------------|---------------|---------------------------|---------------|
| Total SCF energy          | -840.82376602 | Total SCF energy          | -840.82094354 |
| Gibbs free energy at 298K | -840.60501900 | Gibbs free energy at 298K | -840.60274000 |

### 3TS

Cartesian coordinates

| ATOM | X         | Y         | Z         |
|------|-----------|-----------|-----------|
| C    | 1.445500  | 0.439121  | 0.060967  |
| C    | 2.112116  | 0.548671  | 1.292548  |
| C    | 3.193282  | 1.437321  | 1.409823  |
| C    | 3.581918  | 2.194272  | 0.294891  |
| C    | 2.915575  | 2.086944  | -0.935364 |
| C    | 1.834841  | 1.199157  | -1.055252 |
| H    | 3.732840  | 1.549363  | 2.348388  |
| H    | 4.419373  | 2.879769  | 0.385624  |
| H    | 3.244871  | 2.692609  | -1.777590 |
| C    | 1.524479  | -0.340785 | 2.279662  |
| N    | 0.520441  | -1.076813 | 1.888653  |
| C    | 0.995260  | 0.899521  | -2.203861 |
| N    | 0.062958  | 0.004713  | -2.031455 |
| Rh   | -0.087405 | -0.786740 | -0.103621 |
| Si   | 1.160576  | -2.685446 | -0.762968 |
| H    | -1.375841 | -1.980267 | -0.324973 |
| H    | -2.230554 | -1.597172 | 1.447686  |
| C    | -2.868174 | -1.693250 | 0.577857  |
| C    | -3.561979 | -0.595106 | 0.115904  |
| H    | -3.265473 | -2.692036 | 0.417297  |
| H    | -4.461274 | -0.689427 | -0.482772 |
| C    | -2.953498 | 0.696570  | 0.237951  |
| O    | -1.733923 | 0.900144  | 0.405296  |
| O    | -3.806243 | 1.740030  | 0.092930  |
| C    | -3.214247 | 3.042530  | 0.087180  |
| H    | -2.459043 | 3.127431  | -0.700178 |
| H    | -4.036356 | 3.736262  | -0.097129 |
| H    | -2.742738 | 3.262350  | 1.049527  |
| H    | 0.790681  | -3.168638 | -2.126759 |
| H    | 2.639578  | -2.448979 | -0.804658 |
| H    | 0.963679  | -3.831738 | 0.174855  |
| H    | 1.135031  | 1.382258  | -3.173904 |
| H    | 1.903079  | -0.410900 | 3.301946  |
| H    | 0.142367  | -1.707685 | 2.592885  |
| H    | -0.507959 | -0.210126 | -2.845774 |

|                           |               |
|---------------------------|---------------|
| Total SCF energy          | -840.79106825 |
| Gibbs free energy at 298K | -840.57566900 |
| Imaginary frequency       | -584.488      |

### 4TS

Cartesian coordinates

| ATOM | X         | Y         | Z         |
|------|-----------|-----------|-----------|
| C    | 0.856616  | 0.852810  | -0.013634 |
| C    | 0.530624  | 1.654188  | 1.098228  |
| C    | 0.944136  | 2.994280  | 1.119043  |
| C    | 1.680330  | 3.505604  | 0.038542  |
| C    | 2.019662  | 2.706290  | -1.061205 |
| C    | 1.607332  | 1.363453  | -1.089757 |
| H    | 0.706094  | 3.643530  | 1.959376  |
| H    | 2.000265  | 4.543206  | 0.059164  |
| H    | 2.600982  | 3.133513  | -1.875964 |
| C    | -0.220453 | 0.893920  | 2.080264  |
| N    | -0.422288 | -0.364653 | 1.807701  |
| C    | 1.860836  | 0.337504  | -2.079129 |
| N    | 1.380090  | -0.851829 | -1.827216 |
| Rh   | 0.317550  | -1.041535 | -0.021591 |
| Si   | 2.350205  | -1.785313 | 1.073081  |
| H    | 0.219650  | -2.714536 | 0.182122  |
| H    | -2.000243 | -2.772473 | 0.091216  |
| C    | -1.466988 | -2.332385 | -0.744344 |
| C    | -1.735512 | -0.993800 | -1.079557 |
| H    | -1.142156 | -3.022193 | -1.514885 |
| H    | -1.527725 | -0.621616 | -2.076276 |
| C    | -2.696849 | -0.210903 | -0.283340 |
| O    | -3.194316 | -0.536186 | 0.782935  |
| O    | -3.004439 | 0.958204  | -0.907383 |
| H    | -0.610003 | 1.335213  | 2.999555  |
| H    | 2.440941  | 0.524323  | -2.985356 |
| H    | 3.146191  | -2.740368 | 0.244388  |
| H    | 2.111652  | -2.461870 | 2.382182  |
| H    | 3.276369  | -0.647337 | 1.371161  |
| H    | 1.596668  | -1.569264 | -2.515702 |
| H    | -0.996254 | -0.883716 | 2.467352  |
| C    | -3.965453 | 1.776568  | -0.232716 |
| H    | -4.096884 | 2.656917  | -0.863590 |
| H    | -4.914795 | 1.245389  | -0.115749 |
| H    | -3.603624 | 2.068777  | 0.757283  |

|                           |               |
|---------------------------|---------------|
| Total SCF energy          | -840.82162374 |
| Gibbs free energy at 298K | -840.60443500 |
| Imaginary frequency       | -220.857      |



| 5TS                       |           |               |           | 6TS                       |           |               |           |
|---------------------------|-----------|---------------|-----------|---------------------------|-----------|---------------|-----------|
| Cartesian coordinates     |           |               |           | Cartesian coordinates     |           |               |           |
| ATOM                      | X         | Y             | Z         | ATOM                      | X         | Y             | Z         |
| C                         | 1.765252  | 0.230276      | -0.167179 | C                         | 1.544995  | -0.220100     | 0.137432  |
| C                         | 2.075565  | 1.569730      | 0.160041  | C                         | 1.980474  | 0.685234      | 1.129296  |
| C                         | 3.404532  | 2.004162      | 0.055976  | C                         | 3.325382  | 1.078630      | 1.138730  |
| C                         | 4.397489  | 1.104475      | -0.362926 | C                         | 4.207458  | 0.564920      | 0.175339  |
| C                         | 4.093744  | -0.226508     | -0.677591 | C                         | 3.773264  | -0.335452     | -0.805478 |
| C                         | 2.766482  | -0.675551     | -0.578954 | C                         | 2.428220  | -0.738373     | -0.833177 |
| H                         | 3.678006  | 3.029870      | 0.295525  | H                         | 3.693610  | 1.780624      | 1.884002  |
| H                         | 5.425079  | 1.447241      | -0.440212 | H                         | 5.248412  | 0.873448      | 0.190647  |
| H                         | 4.889523  | -0.898767     | -0.992475 | H                         | 4.481978  | -0.716509     | -1.537818 |
| C                         | 0.884327  | 2.293901      | 0.552589  | C                         | 0.883635  | 1.092651      | 1.982498  |
| N                         | -0.219668 | 1.600463      | 0.581874  | N                         | -0.266199 | 0.537093      | 1.731641  |
| C                         | 2.215518  | -1.989046     | -0.815572 | C                         | 1.754756  | -1.653123     | -1.724586 |
| N                         | 0.928293  | -2.123456     | -0.619506 | N                         | 0.482022  | -1.841055     | -1.501013 |
| Rh                        | -0.068722 | -0.389867     | 0.019944  | Rh                        | -0.290492 | -0.793778     | 0.137347  |
| Si                        | 0.189447  | -1.122086     | 2.342367  | Si                        | -2.405423 | -2.349753     | 0.747629  |
| H                         | -1.609114 | -1.033375     | 0.447859  | H                         | 0.291187  | -1.956170     | 1.098752  |
| H                         | -1.069940 | 1.116416      | -2.066691 | H                         | -3.373991 | -0.119308     | 0.070086  |
| C                         | -1.086822 | 0.041961      | -1.921613 | C                         | -2.612200 | -0.559587     | -0.573875 |
| C                         | -2.111185 | -0.525110     | -1.115699 | C                         | -1.649059 | 0.437803      | -1.064592 |
| H                         | -0.639840 | -0.563500     | -2.702604 | H                         | -3.054534 | -1.166452     | -1.365182 |
| H                         | -2.457352 | -1.530816     | -1.331978 | H                         | -1.342080 | 0.378666      | -2.104137 |
| C                         | -3.167484 | 0.370662      | -0.545483 | C                         | -1.762739 | 1.794088      | -0.531554 |
| O                         | -3.042349 | 1.555850      | -0.295063 | O                         | -2.353713 | 2.131800      | 0.489788  |
| O                         | -4.312922 | -0.310542     | -0.341959 | O                         | -1.110628 | 2.700390      | -1.317179 |
| H                         | 0.886863  | 3.356852      | 0.800653  | H                         | 0.990816  | 1.837037      | 2.772912  |
| H                         | 2.827798  | -2.840240     | -1.119583 | H                         | 2.269996  | -2.177076     | -2.531386 |
| H                         | -0.153319 | -2.560298     | 2.572634  | H                         | -1.833776 | -3.619416     | 0.217630  |
| H                         | -0.635357 | -0.349221     | 3.321024  | H                         | -3.877339 | -2.516888     | 0.562789  |
| H                         | 1.603809  | -0.981498     | 2.814436  | H                         | -2.233493 | -2.286347     | 2.223821  |
| H                         | 0.559736  | -3.062419     | -0.753106 | H                         | 0.018077  | -2.508761     | -2.113084 |
| H                         | -1.089846 | 2.088872      | 0.784739  | H                         | -1.071008 | 0.883069      | 2.249479  |
| C                         | -5.389246 | 0.446041      | 0.234582  | C                         | -1.164840 | 4.053756      | -0.861416 |
| H                         | -6.223103 | -0.251242     | 0.319181  | H                         | -0.602650 | 4.634676      | -1.594836 |
| H                         | -5.104759 | 0.825327      | 1.219844  | H                         | -2.198483 | 4.409032      | -0.807302 |
| H                         | -5.655215 | 1.288548      | -0.409306 | H                         | -0.710742 | 4.154477      | 0.129224  |
| Total SCF energy          |           | -840.81603866 |           | Total SCF energy          |           | -840.80580866 |           |
| Gibbs free energy at 298K |           | -840.59876900 |           | Gibbs free energy at 298K |           | -840.58557200 |           |
| Imaginary frequency       |           | -674.480      |           | Imaginary frequency       |           | -161.452      |           |

3b

4b

Cartesian coordinates

| ATOM                      | X         | Y             | Z         |
|---------------------------|-----------|---------------|-----------|
| C                         | 1.636695  | -0.159808     | 0.147844  |
| C                         | 2.578004  | -0.476836     | -0.856422 |
| C                         | 3.840633  | -0.953336     | -0.468524 |
| C                         | 4.127304  | -1.130836     | 0.891427  |
| C                         | 3.166481  | -0.878017     | 1.883069  |
| C                         | 1.901127  | -0.398893     | 1.516670  |
| H                         | 4.593817  | -1.200646     | -1.213609 |
| H                         | 5.106495  | -1.497451     | 1.183779  |
| H                         | 3.406915  | -1.072053     | 2.926079  |
| C                         | 2.016491  | -0.313089     | -2.181760 |
| N                         | 0.759748  | 0.038792      | -2.242693 |
| C                         | 0.711390  | -0.199773     | 2.326032  |
| N                         | -0.366402 | 0.139344      | 1.678142  |
| Rh                        | -0.157430 | 0.280285      | -0.369481 |
| Si                        | 0.770876  | 2.477469      | -0.199466 |
| H                         | -2.722206 | 2.117630      | -0.140901 |
| H                         | -3.112383 | 2.396156      | 1.563987  |
| C                         | -3.447596 | 1.887703      | 0.645864  |
| C                         | -3.609276 | 0.404336      | 0.820273  |
| H                         | -4.398493 | 2.365184      | 0.364847  |
| H                         | -4.384895 | 0.044655      | 1.490813  |
| C                         | -2.957566 | -0.539383     | 0.088864  |
| O                         | -2.066364 | -0.343733     | -0.858381 |
| O                         | -3.251537 | -1.859805     | 0.387779  |
| C                         | -3.057208 | -2.801137     | -0.658894 |
| H                         | -2.015011 | -2.840325     | -0.991347 |
| H                         | -3.346258 | -3.770156     | -0.243371 |
| H                         | -3.693487 | -2.576494     | -1.526012 |
| H                         | -0.317366 | 3.402553      | -0.628489 |
| H                         | 1.171151  | 2.845547      | 1.186877  |
| H                         | 1.943542  | 2.709794      | -1.088708 |
| H                         | 0.696111  | -0.368000     | 3.403801  |
| H                         | 2.598472  | -0.490625     | -3.087672 |
| H                         | 0.366490  | 0.147067      | -3.175265 |
| H                         | -1.249881 | 0.225519      | 2.184375  |
| Total SCF energy          |           | -840.83349967 |           |
| Gibbs free energy at 298K |           | -840.61398400 |           |

**5b**

Cartesian coordinates

| ATOM | X        | Y        | Z         |
|------|----------|----------|-----------|
| C    | 1.758728 | 0.286907 | -0.219277 |

Cartesian coordinates

| ATOM                      | X         | Y             | Z         |
|---------------------------|-----------|---------------|-----------|
| C                         | -1.245272 | 0.519389      | 0.035761  |
| C                         | -1.211705 | 1.505877      | -0.980772 |
| C                         | -2.120470 | 2.569466      | -0.907959 |
| C                         | -3.025980 | 2.644136      | 0.161820  |
| C                         | -3.033325 | 1.683950      | 1.180942  |
| C                         | -2.131454 | 0.608688      | 1.136632  |
| H                         | -2.123649 | 3.345599      | -1.670166 |
| H                         | -3.727394 | 3.471632      | 0.206334  |
| H                         | -3.735258 | 1.780139      | 2.006435  |
| C                         | -0.142954 | 1.257848      | -1.919556 |
| N                         | 0.564633  | 0.184999      | -1.695689 |
| C                         | -1.928238 | -0.466105     | 2.072512  |
| N                         | -0.973469 | -1.310939     | 1.773147  |
| Rh                        | 0.017878  | -0.894747     | -0.017386 |
| Si                        | -1.733697 | -2.099979     | -1.266047 |
| H                         | 3.056562  | -2.149728     | -0.309790 |
| C                         | 2.234267  | -2.115148     | 0.410342  |
| C                         | 1.985196  | -0.697894     | 0.895494  |
| H                         | 2.421116  | -2.811635     | 1.233935  |
| H                         | 1.891127  | -0.566884     | 1.970483  |
| C                         | 2.790385  | 0.343507      | 0.254444  |
| O                         | 3.347750  | 0.268746      | -0.837744 |
| O                         | 2.850565  | 1.477994      | 1.011720  |
| H                         | 0.095119  | 1.932144      | -2.742567 |
| H                         | -2.527888 | -0.585713     | 2.975325  |
| H                         | -3.013938 | -2.271788     | -0.511989 |
| H                         | -1.264137 | -3.485726     | -1.590078 |
| H                         | -2.097535 | -1.475115     | -2.574133 |
| H                         | -0.843172 | -2.079861     | 2.426534  |
| H                         | 1.397347  | 0.044092      | -2.264395 |
| H                         | 1.360871  | -2.573228     | -0.145519 |
| C                         | 3.586847  | 2.559073      | 0.436228  |
| H                         | 3.528498  | 3.374089      | 1.159942  |
| H                         | 4.630399  | 2.276941      | 0.265727  |
| H                         | 3.150731  | 2.869299      | -0.518401 |
| Total SCF energy          |           | -840.85361734 |           |
| Gibbs free energy at 298K |           | -840.63242300 |           |

**6b**

Cartesian coordinates

| ATOM | X        | Y         | Z        |
|------|----------|-----------|----------|
| C    | 1.183941 | -0.727000 | 0.279026 |

|                           |           |               |           |                           |           |               |           |
|---------------------------|-----------|---------------|-----------|---------------------------|-----------|---------------|-----------|
| C                         | 1.942677  | 1.668919      | 0.046205  | C                         | 1.787249  | -0.042069     | 1.353342  |
| C                         | 3.192637  | 2.235066      | -0.234903 | C                         | 3.181099  | 0.114346      | 1.348647  |
| C                         | 4.216703  | 1.442852      | -0.777555 | C                         | 3.936300  | -0.403731     | 0.286343  |
| C                         | 4.018196  | 0.086325      | -1.063349 | C                         | 3.327391  | -1.070409     | -0.785242 |
| C                         | 2.776880  | -0.512168     | -0.795615 | C                         | 1.934025  | -1.235127     | -0.800456 |
| H                         | 3.374463  | 3.290486      | -0.043337 | H                         | 3.681760  | 0.636650      | 2.161021  |
| H                         | 5.181028  | 1.894772      | -0.989220 | H                         | 5.015106  | -0.280566     | 0.291968  |
| H                         | 4.827623  | -0.496581     | -1.497821 | H                         | 3.939173  | -1.452332     | -1.599712 |
| C                         | 0.732641  | 2.279103      | 0.543668  | C                         | 0.804693  | 0.415750      | 2.312372  |
| N                         | -0.286616 | 1.473770      | 0.664778  | N                         | -0.431674 | 0.102463      | 2.051788  |
| C                         | 2.329527  | -1.859356     | -1.028537 | C                         | 1.083761  | -1.854674     | -1.791561 |
| N                         | 1.085713  | -2.111058     | -0.702171 | N                         | -0.194530 | -1.840971     | -1.535309 |
| Rh                        | 0.063764  | -0.477478     | 0.111706  | Rh                        | -0.713368 | -0.908686     | 0.256824  |
| Si                        | 0.915020  | -1.060325     | 2.382449  | Si                        | -3.687057 | -0.362929     | -0.054237 |
| H                         | -2.039206 | -1.277726     | 0.405098  | H                         | -0.491997 | -2.328301     | 1.026303  |
| H                         | -1.523304 | 0.715298      | -1.782891 | H                         | -2.634672 | 1.710897      | 0.830540  |
| C                         | -1.333560 | -0.311184     | -1.468194 | C                         | -2.761000 | 1.291574      | -0.173780 |
| C                         | -2.446537 | -0.890617     | -0.571752 | C                         | -1.384102 | 0.993955      | -0.775616 |
| H                         | -1.120966 | -0.944883     | -2.330408 | H                         | -3.334472 | 2.035560      | -0.748328 |
| H                         | -2.941493 | -1.754789     | -1.023492 | H                         | -1.428865 | 0.744428      | -1.837194 |
| C                         | -3.470551 | 0.154594      | -0.184605 | C                         | -0.367625 | 2.018896      | -0.519194 |
| O                         | -3.237648 | 1.167309      | 0.450579  | O                         | -0.296742 | 2.757325      | 0.456605  |
| O                         | -4.697352 | -0.152080     | -0.648417 | O                         | 0.583921  | 2.054956      | -1.509975 |
| H                         | 0.655703  | 3.337988      | 0.792089  | H                         | 1.069786  | 0.988789      | 3.200738  |
| H                         | 2.976493  | -2.634479     | -1.440432 | H                         | 1.475072  | -2.312681     | -2.701139 |
| H                         | -0.120472 | -1.820904     | 3.161238  | H                         | -4.199151 | -0.839052     | -1.364983 |
| H                         | 1.264687  | 0.111807      | 3.246820  | H                         | -4.786612 | -0.429189     | 0.944397  |
| H                         | 2.126352  | -1.943479     | 2.392979  | H                         | -2.682839 | -1.420421     | 0.394575  |
| H                         | 0.781044  | -3.071034     | -0.846193 | H                         | -0.792097 | -2.284830     | -2.228695 |
| H                         | -1.187863 | 1.849067      | 0.956059  | H                         | -1.122912 | 0.445476      | 2.713857  |
| C                         | -5.729673 | 0.805551      | -0.356578 | C                         | 1.656567  | 2.970780      | -1.288940 |
| H                         | -6.638429 | 0.398243      | -0.800300 | H                         | 2.277627  | 2.921984      | -2.185987 |
| H                         | -5.847659 | 0.924359      | 0.723656  | H                         | 1.282493  | 3.988514      | -1.141809 |
| H                         | -5.487349 | 1.776122      | -0.797511 | H                         | 2.245149  | 2.684509      | -0.411355 |
| Total SCF energy          |           | -840.83849839 |           | Total SCF energy          |           | -840.82368771 |           |
| Gibbs free energy at 298K |           | -840.61842000 |           | Gibbs free energy at 298K |           | -840.60289500 |           |

**7a**

Cartesian coordinates

| ATOM | X        | Y         | Z         |
|------|----------|-----------|-----------|
| C    | 2.534465 | -0.470222 | -0.899909 |
| C    | 1.621210 | 0.216283  | -0.077090 |
| C    | 2.032501 | 1.293873  | 0.731762  |
| C    | 3.381083 | 1.685184  | 0.717712  |

**7TS**

Cartesian coordinates

| ATOM | X        | Y         | Z         |
|------|----------|-----------|-----------|
| C    | 3.477751 | -0.626237 | -1.123914 |
| C    | 2.732309 | -0.202041 | -0.005801 |
| C    | 3.319879 | 0.544946  | 1.034326  |
| C    | 4.690943 | 0.840839  | 0.965744  |

|                           |           |               |           |    |           |           |           |
|---------------------------|-----------|---------------|-----------|----|-----------|-----------|-----------|
| C                         | 4.288051  | 0.998560      | -0.101486 | C  | 5.437859  | 0.400987  | -0.135418 |
| C                         | 3.879726  | -0.072205     | -0.911063 | C  | 4.845019  | -0.320810 | -1.182495 |
| H                         | 3.732258  | 2.512120      | 1.331787  | H  | 5.178844  | 1.411199  | 1.753387  |
| H                         | 5.330488  | 1.302532      | -0.110217 | H  | 6.497708  | 0.631825  | -0.184094 |
| H                         | 4.610431  | -0.579565     | -1.537900 | H  | 5.450419  | -0.630633 | -2.031672 |
| C                         | 1.870480  | -1.528709     | -1.639547 | C  | 2.633378  | -1.312103 | -2.086091 |
| N                         | 0.596805  | -1.686748     | -1.411758 | N  | 1.380361  | -1.444157 | -1.760031 |
| Rh                        | -0.251443 | -0.327031     | -0.060681 | Rh | 0.844969  | -0.541580 | 0.031627  |
| C                         | 0.915714  | 1.832903      | 1.483187  | C  | 2.335895  | 0.913765  | 2.033773  |
| N                         | -0.239845 | 1.251664      | 1.305850  | N  | 1.111582  | 0.522109  | 1.814822  |
| C                         | -2.501230 | -0.940720     | -0.284812 | C  | -2.124209 | 1.727170  | -1.152262 |
| H                         | -2.330172 | -1.717960     | -1.028078 | H  | -2.264680 | 0.971359  | -1.917623 |
| C                         | -2.453654 | 0.373491      | -0.843561 | C  | -0.796098 | 1.948892  | -0.798373 |
| C                         | -3.491173 | -1.291407     | 0.804126  | C  | -3.229350 | 2.719993  | -0.929160 |
| H                         | -4.521496 | -1.365565     | 0.423862  | H  | -3.479358 | 3.260190  | -1.855744 |
| H                         | -3.241480 | -2.256347     | 1.259249  | H  | -4.157104 | 2.233466  | -0.597527 |
| H                         | -3.496130 | -0.541124     | 1.601396  | H  | -2.945927 | 3.464477  | -0.180545 |
| O                         | -1.619792 | 0.723378      | -1.726475 | O  | 0.202762  | 1.269525  | -1.194921 |
| O                         | -3.254650 | 1.310750      | -0.252774 | O  | -0.592626 | 2.959189  | 0.134063  |
| C                         | -3.078561 | 2.654973      | -0.710724 | C  | 0.678962  | 3.598882  | 0.091541  |
| Si                        | 0.010819  | -1.879769     | 1.717871  | Si | 1.309836  | -2.611252 | 1.158217  |
| H                         | 1.399593  | -1.942676     | 2.267972  | H  | -5.762222 | -2.551066 | -1.365379 |
| H                         | -0.877988 | -1.547975     | 2.871123  | C  | -5.427973 | -1.768823 | -0.688722 |
| H                         | -0.329727 | -3.271098     | 1.293157  | C  | -6.361543 | -1.070886 | 0.086741  |
| H                         | -3.289425 | 2.737238      | -1.780822 | C  | -4.072766 | -1.469532 | -0.592009 |
| H                         | -3.793035 | 3.252644      | -0.140769 | C  | -5.930683 | -0.070681 | 0.960951  |
| H                         | -2.058207 | 3.006903      | -0.529764 | H  | -7.419142 | -1.309390 | 0.011305  |
| H                         | 2.397461  | -2.167326     | -2.351601 | C  | -3.631278 | -0.459625 | 0.279748  |
| H                         | 0.136380  | -2.425180     | -1.940403 | H  | -3.335449 | -2.009428 | -1.177436 |
| H                         | 1.020298  | 2.673238      | 2.172540  | C  | -4.572616 | 0.233893  | 1.056597  |
| H                         | -1.020632 | 1.623860      | 1.842674  | H  | -6.651079 | 0.469987  | 1.569034  |
| Total SCF energy          |           | -840.84822414 |           | H  | -4.233937 | 1.007977  | 1.741401  |
| Gibbs free energy at 298K |           | -840.62739600 |           | C  | -2.191692 | -0.164767 | 0.420079  |
|                           |           |               |           | H  | -1.930753 | 0.563454  | 1.201316  |
|                           |           |               |           | O  | -1.316752 | -0.935387 | -0.049436 |
|                           |           |               |           | H  | 0.693514  | 4.296198  | 0.933519  |
|                           |           |               |           | H  | 1.502734  | 2.887785  | 0.177796  |
|                           |           |               |           | H  | 0.799010  | 4.162830  | -0.843338 |
|                           |           |               |           | H  | 2.407853  | -3.391790 | 0.512916  |
|                           |           |               |           | H  | 1.710098  | -2.429778 | 2.586354  |
|                           |           |               |           | H  | 0.099198  | -3.481947 | 1.147267  |
|                           |           |               |           | H  | 3.013471  | -1.690990 | -3.036292 |
|                           |           |               |           | H  | 2.592309  | 1.492002  | 2.923191  |
|                           |           |               |           | H  | 0.770988  | -1.895168 | -2.438719 |

H 0.428789 0.790640 2.519912  
Total SCF energy -1186.41612278  
Gibbs free energy at 298K -1186.09461300  
Imaginary frequency -74.110

**7b**

Cartesian coordinates

| ATOM | X         | Y         | Z         |
|------|-----------|-----------|-----------|
| C    | 3.559759  | -0.707271 | -1.026037 |
| C    | 2.760355  | -0.297041 | 0.060522  |
| C    | 3.324184  | 0.338614  | 1.184265  |
| C    | 4.712787  | 0.543588  | 1.230538  |
| C    | 5.506376  | 0.121389  | 0.154861  |
| C    | 4.945055  | -0.495804 | -0.974240 |
| H    | 5.181439  | 1.025557  | 2.086482  |
| H    | 6.579953  | 0.280233  | 0.193094  |
| H    | 5.591015  | -0.798567 | -1.796118 |
| C    | 2.742538  | -1.287713 | -2.079267 |
| N    | 1.459696  | -1.336935 | -1.854614 |
| Rh   | 0.840097  | -0.500480 | -0.060011 |
| C    | 2.301187  | 0.677846  | 2.155346  |
| N    | 1.067775  | 0.388835  | 1.836517  |
| C    | -2.076593 | 1.502878  | -0.897000 |
| H    | -2.062235 | 1.053218  | -1.895687 |
| C    | -0.745854 | 2.188273  | -0.720777 |
| C    | -3.272028 | 2.454496  | -0.762294 |
| H    | -3.158896 | 3.327539  | -1.413696 |
| H    | -4.193485 | 1.936580  | -1.037748 |
| H    | -3.384797 | 2.822072  | 0.262870  |
| O    | 0.351833  | 1.710731  | -1.001052 |
| O    | -0.840280 | 3.411714  | -0.160203 |
| C    | 0.397601  | 4.102501  | 0.067986  |
| Si   | 0.838863  | -2.640520 | 0.949552  |
| H    | -5.601925 | -2.438448 | -1.546580 |
| C    | -5.265101 | -1.753941 | -0.771430 |
| C    | -6.122521 | -1.414085 | 0.279579  |
| C    | -3.974810 | -1.227510 | -0.824278 |
| C    | -5.675959 | -0.547712 | 1.278300  |
| H    | -7.126312 | -1.829274 | 0.323654  |
| C    | -3.521591 | -0.345582 | 0.165686  |
| H    | -3.289718 | -1.510694 | -1.617162 |
| C    | -4.383748 | -0.019212 | 1.218286  |
| H    | -6.329643 | -0.287340 | 2.107461  |
| H    | -4.038546 | 0.650682  | 2.003844  |

**8TS**

Cartesian coordinates

| ATOM | X         | Y         | Z         |
|------|-----------|-----------|-----------|
| C    | 3.675494  | -1.145429 | -0.786912 |
| C    | 2.891137  | -0.361047 | 0.086471  |
| C    | 3.470537  | 0.286600  | 1.197560  |
| C    | 4.848119  | 0.151282  | 1.432546  |
| C    | 5.622389  | -0.624715 | 0.559167  |
| C    | 5.050941  | -1.273920 | -0.546142 |
| H    | 5.322317  | 0.637939  | 2.282617  |
| H    | 6.687675  | -0.728022 | 0.742716  |
| H    | 5.681379  | -1.870666 | -1.202439 |
| C    | 2.856922  | -1.720447 | -1.839550 |
| N    | 1.581509  | -1.450186 | -1.793680 |
| Rh   | 0.996421  | -0.211867 | -0.230932 |
| C    | 2.465938  | 1.009474  | 1.951380  |
| N    | 1.239288  | 0.945724  | 1.504848  |
| C    | -2.269554 | 1.504773  | -0.866209 |
| H    | -2.439580 | 1.088026  | -1.863657 |
| C    | -0.959830 | 2.263989  | -0.968353 |
| C    | -3.430098 | 2.439360  | -0.483593 |
| H    | -3.468390 | 3.308154  | -1.150493 |
| H    | -4.383703 | 1.911222  | -0.559864 |
| H    | -3.322691 | 2.810416  | 0.540482  |
| O    | -0.158048 | 2.180081  | -1.878583 |
| O    | -0.764876 | 3.094619  | 0.092033  |
| C    | 0.397532  | 3.934092  | 0.007542  |
| Si   | -0.082142 | -1.997301 | 0.940912  |
| H    | -5.382262 | -2.703180 | -1.459744 |
| C    | -5.071910 | -2.023968 | -0.669385 |
| C    | -5.889471 | -1.833442 | 0.448319  |
| C    | -3.854446 | -1.351347 | -0.772491 |
| C    | -5.476910 | -0.969233 | 1.463468  |
| H    | -6.836415 | -2.360910 | 0.529964  |
| C    | -3.435033 | -0.474494 | 0.237270  |
| H    | -3.203946 | -1.514892 | -1.626278 |
| C    | -4.256889 | -0.297048 | 1.356105  |
| H    | -6.099593 | -0.822510 | 2.342561  |
| H    | -3.936384 | 0.368746  | 2.154858  |

|                           |           |                |           |                           |           |                |           |
|---------------------------|-----------|----------------|-----------|---------------------------|-----------|----------------|-----------|
| C                         | -2.102119 | 0.219749       | 0.084201  | C                         | -2.109480 | 0.269961       | 0.098698  |
| H                         | -1.856156 | 0.620000       | 1.094980  | H                         | -1.845793 | 0.671682       | 1.094959  |
| O                         | -1.224172 | -0.724800      | -0.360999 | O                         | -1.121571 | -0.578820      | -0.408112 |
| H                         | 0.117869  | 5.061531       | 0.505608  | H                         | 0.346787  | 4.592187       | 0.876723  |
| H                         | 1.034556  | 3.537207       | 0.753052  | H                         | 1.311116  | 3.335214       | 0.030777  |
| H                         | 0.934334  | 4.251272       | -0.872731 | H                         | 0.379993  | 4.519335       | -0.915584 |
| H                         | 0.249403  | -3.640001      | 0.017143  | H                         | -0.590300 | -3.101262      | 0.088446  |
| H                         | 2.192506  | -3.142466      | 1.333347  | H                         | 1.066278  | -2.609840      | 1.710186  |
| H                         | 0.019195  | -2.616898      | 2.193708  | H                         | -1.047627 | -1.610474      | 2.006211  |
| H                         | 3.165432  | -1.662969      | -3.013354 | H                         | 3.271715  | -2.349506      | -2.629877 |
| H                         | 2.538706  | 1.135919       | 3.118180  | H                         | 2.706664  | 1.578851       | 2.851939  |
| H                         | 0.873234  | -1.741015      | -2.582087 | H                         | 1.004883  | -1.855620      | -2.528344 |
| H                         | 0.367177  | 0.589492       | 2.547765  | H                         | 0.546983  | 1.458918       | 2.046796  |
| Total SCF energy          |           | -1186.43756544 |           | Total SCF energy          |           | -1186.43017693 |           |
| Gibbs free energy at 298K |           | -1186.11150200 |           | Gibbs free energy at 298K |           | -1186.10297700 |           |
|                           |           |                |           | Imaginary frequency       |           | -88.810        |           |

**8**

Cartesian coordinates

| ATOM | X         | Y         | Z         |
|------|-----------|-----------|-----------|
| C    | -3.907127 | 0.418509  | 0.355665  |
| C    | -2.990404 | -0.594649 | -0.032532 |
| C    | -3.463112 | -1.810541 | -0.589902 |
| C    | -4.842108 | -2.002059 | -0.766591 |
| C    | -5.736511 | -0.991605 | -0.386506 |
| C    | -5.282705 | 0.211811  | 0.173400  |
| H    | -5.225797 | -2.927879 | -1.192170 |
| H    | -6.803212 | -1.145065 | -0.524951 |
| H    | -6.003268 | 0.974848  | 0.463284  |
| C    | -3.205308 | 1.557052  | 0.903101  |
| N    | -1.897957 | 1.458123  | 0.946428  |
| Rh   | -1.131037 | -0.326635 | 0.227453  |
| C    | -2.362096 | -2.699240 | -0.876349 |
| N    | -1.162807 | -2.248677 | -0.591689 |
| C    | 2.537993  | 1.813660  | -0.326425 |
| H    | 3.050388  | 2.035638  | 0.615058  |
| C    | 1.280850  | 2.679621  | -0.308512 |
| C    | 3.462261  | 2.141848  | -1.511137 |
| H    | 3.706435  | 3.209120  | -1.526269 |
| H    | 4.397395  | 1.580025  | -1.437018 |
| H    | 2.984065  | 1.894194  | -2.463135 |
| O    | 0.805594  | 3.185194  | 0.690048  |
| O    | 0.755583  | 2.810406  | -1.539057 |
| C    | -0.468019 | 3.562042  | -1.638061 |

**9TS**

Cartesian coordinates

| ATOM | X         | Y         | Z         |
|------|-----------|-----------|-----------|
| C    | 2.981151  | 0.774349  | -0.855379 |
| C    | 2.451960  | -0.152134 | 0.061966  |
| C    | 3.196536  | -0.612186 | 1.162587  |
| C    | 4.507231  | -0.139593 | 1.343146  |
| C    | 5.038451  | 0.776076  | 0.425445  |
| C    | 4.289848  | 1.240958  | -0.667934 |
| H    | 5.112942  | -0.472900 | 2.183101  |
| H    | 6.052414  | 1.138467  | 0.564792  |
| H    | 4.732113  | 1.960827  | -1.353318 |
| C    | 1.988548  | 1.137866  | -1.858082 |
| N    | 0.838438  | 0.537603  | -1.777862 |
| Rh   | 0.638256  | -0.771600 | -0.185193 |
| C    | 2.419967  | -1.541957 | 1.964043  |
| N    | 1.211224  | -1.805408 | 1.550070  |
| C    | -1.349065 | 1.129631  | 1.171983  |
| H    | -2.424075 | 1.254585  | 1.252337  |
| C    | -0.877721 | 2.096978  | 0.187079  |
| O    | -1.431926 | 2.391746  | -0.868189 |
| O    | 0.307628  | 2.716927  | 0.551511  |
| C    | 0.667783  | 3.842211  | -0.244997 |
| Si   | 1.512431  | -2.544969 | -1.506391 |
| C    | -0.678226 | 1.054134  | 2.533112  |
| H    | -0.911226 | 1.927770  | 3.161657  |
| H    | 0.411333  | 0.993203  | 2.462896  |

|                           |           |                |           |                           |           |                |           |
|---------------------------|-----------|----------------|-----------|---------------------------|-----------|----------------|-----------|
| Si                        | 1.460736  | -0.019108      | 2.401139  | H                         | -1.026562 | 0.169633       | 3.085926  |
| H                         | 6.264416  | -1.348715      | 1.144655  | C                         | -5.780930 | -0.308566      | 1.038702  |
| C                         | 5.377539  | -1.501034      | 0.535554  | C                         | -4.429727 | -0.581528      | 1.251043  |
| C                         | 5.229254  | -2.675465      | -0.204183 | C                         | -3.521105 | -0.550438      | 0.183855  |
| C                         | 4.390847  | -0.513970      | 0.493268  | C                         | -3.984248 | -0.242887      | -1.102636 |
| C                         | 4.089474  | -2.856970      | -0.990256 | C                         | -5.333280 | 0.032139       | -1.313994 |
| H                         | 5.998906  | -3.441742      | -0.172150 | C                         | -6.235310 | 0.000297       | -0.245753 |
| C                         | 3.238164  | -0.686890      | -0.287412 | H                         | -6.478602 | -0.341154      | 1.871623  |
| H                         | 4.529809  | 0.396209       | 1.069410  | H                         | -4.074480 | -0.827024      | 2.250206  |
| C                         | 3.105667  | -1.869094      | -1.030112 | H                         | -3.272017 | -0.222708      | -1.919897 |
| H                         | 3.968809  | -3.764779      | -1.575275 | H                         | -5.684889 | 0.274601       | -2.313552 |
| H                         | 2.220719  | -2.008968      | -1.646887 | H                         | -7.287620 | 0.214228       | -0.414227 |
| C                         | 2.103419  | 0.324500       | -0.330252 | C                         | -2.084365 | -0.884046      | 0.407271  |
| H                         | 1.530137  | 0.154219       | -1.246392 | H                         | -1.859698 | -1.237501      | 1.427296  |
| O                         | 1.139056  | 0.082095       | 0.719705  | O                         | -1.410491 | -1.345564      | -0.576909 |
| H                         | -0.654835 | 3.671360       | -2.706615 | H                         | 0.095537  | 0.853447       | -2.399425 |
| H                         | -1.280773 | 3.008463       | -1.163294 | H                         | 2.174801  | 1.897249       | -2.619117 |
| H                         | -0.353231 | 4.539715       | -1.163123 | H                         | 0.679615  | -2.460005      | 2.120332  |
| H                         | 0.268258  | 0.503989       | 3.092283  | H                         | 2.816921  | -2.005913      | 2.868923  |
| H                         | 1.728179  | -1.420570      | 2.803840  | H                         | 0.376389  | -3.421535      | -1.893423 |
| H                         | 2.644970  | 0.807282       | 2.747552  | H                         | 2.181761  | -2.048648      | -2.741145 |
| H                         | -3.719811 | 2.452939       | 1.258894  | H                         | 2.511628  | -3.362299      | -0.760424 |
| H                         | -2.508036 | -3.697272      | -1.296626 | H                         | 1.630993  | 4.186061       | 0.138628  |
| H                         | -1.406057 | 2.273507       | 1.311974  | H                         | 0.750794  | 3.583525       | -1.304453 |
| H                         | -0.416123 | -2.913247      | -0.789675 | H                         | -0.077915 | 4.639600       | -0.151059 |
| Total SCF energy          |           | -1186.44655234 |           | Total SCF energy          |           | -1186.38149498 |           |
| Gibbs free energy at 298K |           | -1186.12077100 |           | Gibbs free energy at 298K |           | -1186.06005300 |           |
|                           |           |                |           | Imaginary frequency       |           | -241.230       |           |

### Rh-acrylate

Cartesian coordinates

| ATOM | X         | Y         | Z         |
|------|-----------|-----------|-----------|
| C    | -3.083111 | -1.308593 | -0.275870 |
| C    | -1.707967 | -1.584819 | -0.298185 |
| C    | -1.261982 | -2.817725 | -0.789276 |
| C    | -2.171339 | -3.777730 | -1.249904 |
| C    | -3.543319 | -3.489066 | -1.200893 |
| C    | -4.012441 | -2.259748 | -0.717888 |
| H    | -1.826083 | -4.731172 | -1.641232 |
| H    | -4.255945 | -4.230724 | -1.549901 |
| H    | -5.079015 | -2.051508 | -0.694093 |
| C    | -3.306035 | 0.034816  | 0.235666  |
| O    | -4.527820 | 0.582923  | 0.362573  |

|    |           |           |           |
|----|-----------|-----------|-----------|
| C  | -2.794692 | 2.114142  | 0.930395  |
| C  | -4.325344 | 1.871778  | 1.006080  |
| H  | -4.925943 | 2.607593  | 0.468466  |
| N  | -2.287398 | 0.774934  | 0.579038  |
| H  | -2.405061 | 2.396715  | 1.915455  |
| H  | -4.691433 | 1.788454  | 2.034163  |
| Rh | -0.413399 | -0.225977 | 0.342536  |
| C  | 0.193300  | -2.864393 | -0.745859 |
| O  | 0.894697  | -3.890628 | -1.256240 |
| C  | 2.305103  | -2.232650 | -0.286721 |
| C  | 2.291373  | -3.485800 | -1.200643 |
| H  | 2.862799  | -4.331523 | -0.814538 |
| N  | 0.867408  | -1.879848 | -0.219723 |
| H  | 2.839928  | -1.404383 | -0.757669 |
| H  | 2.611466  | -3.271927 | -2.225478 |
| C  | -2.344070 | 3.192173  | -0.088027 |
| H  | -1.247756 | 3.146174  | -0.100753 |
| C  | -2.754096 | 4.592851  | 0.392162  |
| H  | -3.845126 | 4.714718  | 0.412304  |
| H  | -2.374924 | 4.800610  | 1.400356  |
| H  | -2.355294 | 5.361587  | -0.278727 |
| C  | -2.829471 | 2.915767  | -1.518031 |
| H  | -2.489141 | 1.936756  | -1.870166 |
| H  | -3.923691 | 2.948955  | -1.598251 |
| H  | -2.431738 | 3.672809  | -2.203227 |
| C  | 2.937445  | -2.460182 | 1.107943  |
| H  | 2.836276  | -1.503346 | 1.626649  |
| C  | 4.443708  | -2.732804 | 0.971154  |
| H  | 4.910026  | -2.802537 | 1.960406  |
| H  | 4.650554  | -3.677170 | 0.449736  |
| H  | 4.941826  | -1.923820 | 0.424604  |
| C  | 2.230334  | -3.547146 | 1.928486  |
| H  | 1.170343  | -3.311436 | 2.070713  |
| H  | 2.298232  | -4.535043 | 1.453842  |
| H  | 2.690435  | -3.633784 | 2.919713  |
| C  | 0.883237  | 1.456504  | 1.299374  |
| H  | 0.272173  | 2.352097  | 1.295165  |
| C  | 2.158670  | 1.568569  | 0.583307  |
| O  | 3.076210  | 0.755694  | 0.601139  |
| O  | 2.191556  | 2.737427  | -0.115274 |
| C  | 3.351505  | 3.130779  | -0.918130 |
| C  | 2.915906  | 4.479455  | -1.501346 |
| H  | 3.712891  | 4.899383  | -2.124631 |
| H  | 2.018872  | 4.360845  | -2.118301 |



|                           |           |                |           |
|---------------------------|-----------|----------------|-----------|
| H                         | 2.690298  | 5.190850       | -0.700029 |
| C                         | 3.596178  | 2.116139       | -2.042157 |
| H                         | 4.369992  | 2.494787       | -2.720344 |
| H                         | 3.920414  | 1.156168       | -1.638332 |
| H                         | 2.678918  | 1.965007       | -2.622185 |
| C                         | 4.583147  | 3.305960       | -0.020181 |
| H                         | 5.415497  | 3.711009       | -0.607616 |
| H                         | 4.364797  | 4.010394       | 0.790354  |
| H                         | 4.889188  | 2.353490       | 0.415120  |
| C                         | 0.582641  | 0.407247       | 2.170301  |
| H                         | -0.201121 | 0.535069       | 2.913165  |
| H                         | 1.341004  | -0.328209      | 2.417842  |
| Total SCF energy          |           | -1493.68656682 |           |
| Gibbs free energy at 298K |           | -1493.18355300 |           |
| Free energy in solution   |           | -1493.67166100 |           |

**10a-Z-Si**

**11a-Z-Re**

Cartesian coordinates

Cartesian coordinates

| ATOM | X         | Y         | Z         | ATOM | X         | Y         | Z         |
|------|-----------|-----------|-----------|------|-----------|-----------|-----------|
| C    | -1.136598 | 1.197099  | 2.029986  | C    | -1.401399 | 0.178255  | 1.978045  |
| C    | -0.506681 | 0.139278  | 1.360880  | C    | -0.447837 | -0.530005 | 1.236824  |
| C    | -0.442740 | -1.126930 | 1.957684  | C    | -0.099126 | -1.834998 | 1.606231  |
| C    | -1.023881 | -1.348932 | 3.212169  | C    | -0.691914 | -2.438953 | 2.723123  |
| C    | -1.650218 | -0.278182 | 3.869814  | C    | -1.629355 | -1.708456 | 3.468691  |
| C    | -1.709963 | 0.998323  | 3.294129  | C    | -1.996821 | -0.403522 | 3.105271  |
| H    | -0.991168 | -2.330689 | 3.677888  | H    | -0.435290 | -3.454511 | 3.013844  |
| H    | -2.094983 | -0.442098 | 4.846946  | H    | -2.085150 | -2.164849 | 4.342477  |
| H    | -2.193303 | 1.814894  | 3.824492  | H    | -2.733267 | 0.139576  | 3.692098  |
| C    | -1.043799 | 2.407453  | 1.231470  | C    | 0.842973  | -2.378466 | 0.639501  |
| O    | -1.500273 | 3.601975  | 1.648934  | C    | 1.885122  | -3.877017 | -0.658223 |
| C    | -0.558596 | 3.730035  | -0.531874 | C    | 2.166149  | -2.446108 | -1.193481 |
| C    | -1.013791 | 4.576817  | 0.683155  | H    | 1.212677  | -4.450933 | -1.303534 |
| H    | -1.828750 | 5.270955  | 0.473416  | C    | -1.602171 | 1.496491  | 1.394759  |
| N    | -0.466823 | 2.378942  | 0.058479  | C    | -1.172945 | 3.316948  | 0.140875  |
| H    | 0.440411  | 4.031853  | -0.856996 | C    | -2.453533 | 3.518422  | 0.976458  |
| H    | -0.187188 | 5.119040  | 1.153072  | H    | -0.343497 | 3.840811  | 0.630175  |
| Rh   | 0.380525  | 0.441618  | -0.416844 | H    | -3.367741 | 3.429861  | 0.382932  |
| C    | 0.244832  | -2.051410 | 1.066107  | N    | -0.914788 | 1.866654  | 0.346401  |
| O    | 0.287179  | -3.376287 | 1.265478  | N    | 1.321802  | -1.617108 | -0.307708 |
| C    | 1.354979  | -2.747051 | -0.778406 | H    | -2.471696 | 4.442199  | 1.556046  |
| C    | 0.793078  | -3.951527 | 0.021010  | H    | 1.783637  | -2.342264 | -2.215966 |
| H    | 1.535976  | -4.704411 | 0.287563  | H    | 2.781881  | -4.465024 | -0.459103 |
| N    | 0.805847  | -1.601252 | -0.022794 | O    | 1.198515  | -3.674276 | 0.610110  |

|    |           |           |           |    |           |           |           |
|----|-----------|-----------|-----------|----|-----------|-----------|-----------|
| H  | 0.901435  | -2.730271 | -1.772427 | O  | -2.440483 | 2.405457  | 1.919277  |
| H  | -0.054973 | -4.419456 | -0.482700 | Rh | 0.407275  | 0.336921  | -0.365475 |
| C  | -1.498248 | 3.788438  | -1.761515 | Si | 2.282326  | 1.341065  | 0.771745  |
| H  | -1.156816 | 2.986774  | -2.428373 | C  | -1.197557 | 3.807486  | -1.322914 |
| C  | -1.322738 | 5.122217  | -2.505199 | H  | -0.357562 | 3.290078  | -1.804678 |
| H  | -1.628489 | 5.974717  | -1.884145 | C  | 3.651566  | -2.019905 | -1.200421 |
| H  | -0.280108 | 5.282104  | -2.804592 | H  | 3.649517  | -0.938317 | -1.373425 |
| H  | -1.938878 | 5.144217  | -3.410947 | H  | -0.775819 | -1.799907 | -1.854224 |
| C  | -2.975822 | 3.533462  | -1.425843 | C  | -1.161311 | -0.787340 | -1.838602 |
| H  | -3.112905 | 2.622152  | -0.835292 | C  | -0.499134 | 0.205128  | -2.536124 |
| H  | -3.415655 | 4.366319  | -0.863221 | C  | -2.551963 | -0.668906 | -1.352866 |
| H  | -3.559688 | 3.423947  | -2.346476 | O  | -3.226908 | 0.349492  | -1.329966 |
| C  | 2.891135  | -2.699013 | -0.930488 | O  | -2.996248 | -1.890394 | -0.967701 |
| H  | 3.123445  | -1.696923 | -1.307015 | C  | -4.399406 | -2.134120 | -0.602468 |
| C  | 3.348677  | -3.735922 | -1.968653 | C  | -2.482439 | 3.479622  | -2.098306 |
| H  | 4.429382  | -3.663588 | -2.136062 | H  | -2.331331 | 3.681649  | -3.165698 |
| H  | 3.139234  | -4.763659 | -1.640891 | H  | -2.781620 | 2.435108  | -1.981173 |
| H  | 2.850243  | -3.585548 | -2.934114 | H  | -3.318709 | 4.113248  | -1.774012 |
| C  | 3.645073  | -2.869852 | 0.395309  | C  | -0.907156 | 5.318264  | -1.372482 |
| H  | 3.315542  | -2.139531 | 1.140070  | H  | -0.866726 | 5.666476  | -2.410528 |
| H  | 3.521503  | -3.875149 | 0.819434  | H  | -1.692850 | 5.895315  | -0.866269 |
| H  | 4.718433  | -2.715917 | 0.238971  | H  | 0.050288  | 5.565059  | -0.898692 |
| C  | -1.570995 | -0.091417 | -1.719660 | C  | 4.395200  | -2.709889 | -2.354695 |
| H  | -2.225164 | 0.750072  | -1.532810 | H  | 5.433830  | -2.364157 | -2.403668 |
| C  | -2.134080 | -1.409220 | -1.368459 | H  | 4.423090  | -3.801687 | -2.231852 |
| O  | -1.626477 | -2.495835 | -1.612723 | H  | 3.927236  | -2.493830 | -3.323113 |
| O  | -3.337767 | -1.242220 | -0.767443 | C  | 4.357333  | -2.260656 | 0.140785  |
| C  | -4.198160 | -2.375133 | -0.402694 | H  | 4.471916  | -3.328527 | 0.368705  |
| C  | -5.438397 | -1.681548 | 0.170330  | H  | 5.363130  | -1.827908 | 0.115768  |
| H  | -6.175726 | -2.427352 | 0.486596  | H  | 3.817811  | -1.787347 | 0.966009  |
| H  | -5.170547 | -1.067695 | 1.036461  | C  | 2.510870  | 0.666419  | 2.549023  |
| H  | -5.900631 | -1.033598 | -0.581751 | H  | 3.407246  | 1.084258  | 3.025458  |
| C  | -3.522884 | -3.237377 | 0.669448  | H  | 1.647452  | 0.938722  | 3.166955  |
| H  | -4.219851 | -4.012370 | 1.009671  | H  | 2.596199  | -0.424904 | 2.572606  |
| H  | -2.625085 | -3.720784 | 0.281880  | C  | 2.209663  | 3.238700  | 0.980908  |
| H  | -3.245483 | -2.623702 | 1.532635  | H  | 3.171537  | 3.619160  | 1.347606  |
| C  | -4.564906 | -3.185324 | -1.652644 | H  | 1.992914  | 3.741466  | 0.033295  |
| H  | -5.310714 | -3.944884 | -1.391302 | H  | 1.452049  | 3.531391  | 1.716735  |
| H  | -5.000758 | -2.530792 | -2.415834 | O  | 3.756341  | 1.026099  | -0.075303 |
| H  | -3.689321 | -3.682068 | -2.073094 | C  | 5.019288  | 1.332154  | 0.495515  |
| Si | 2.515983  | 1.166380  | 0.456064  | C  | 6.060588  | 1.426547  | -0.613363 |
| C  | 2.810968  | 3.047721  | 0.282345  | H  | 5.309700  | 0.554521  | 1.219804  |
| H  | 2.714509  | 3.370976  | -0.759343 | H  | 4.991089  | 2.285601  | 1.047180  |
| H  | 2.104341  | 3.619968  | 0.894175  | H  | 7.051589  | 1.648525  | -0.198431 |

|                           |           |                |           |                           |           |                |           |
|---------------------------|-----------|----------------|-----------|---------------------------|-----------|----------------|-----------|
| H                         | 3.819760  | 3.315867       | 0.621440  | H                         | 6.121018  | 0.483057       | -1.167132 |
| C                         | 2.728590  | 0.802395       | 2.323241  | H                         | 5.791769  | 2.217251       | -1.321683 |
| H                         | 3.713527  | 1.125714       | 2.684119  | C                         | -4.794251 | -1.319522      | 0.634011  |
| H                         | 1.968749  | 1.338844       | 2.902647  | H                         | -4.799202 | -0.250631      | 0.417218  |
| H                         | 2.620189  | -0.263030      | 2.551388  | H                         | -5.797069 | -1.619208      | 0.960996  |
| O                         | 3.838678  | 0.408905       | -0.354631 | H                         | -4.095275 | -1.510594      | 1.454182  |
| C                         | 5.168685  | 0.517853       | 0.128911  | C                         | -5.304134 | -1.834548      | -1.804043 |
| H                         | 5.390447  | 1.544051       | 0.465119  | H                         | -4.975312 | -2.403664      | -2.680807 |
| H                         | 5.315079  | -0.141965      | 0.998840  | H                         | -6.333775 | -2.130493      | -1.572823 |
| C                         | 6.136074  | 0.133391       | -0.983960 | H                         | -5.293548 | -0.770857      | -2.048948 |
| H                         | 7.174427  | 0.195033       | -0.635430 | C                         | -4.402605 | -3.631897      | -0.280408 |
| H                         | 5.944161  | -0.890656      | -1.322425 | H                         | -5.409628 | -3.955251      | 0.004568  |
| H                         | 6.014042  | 0.801847       | -1.842800 | H                         | -4.083580 | -4.215622      | -1.150256 |
| C                         | -0.470710 | 0.050869       | -2.552900 | H                         | -3.720317 | -3.846953      | 0.548476  |
| H                         | -0.319896 | 0.966329       | -3.110433 | H                         | 1.379215  | 1.213794       | -1.413368 |
| H                         | 0.030851  | -0.827998      | -2.942903 | H                         | 0.339195  | -0.043905      | -3.174196 |
| H                         | 1.495817  | 0.811132       | -1.611218 | H                         | -0.977973 | 1.159232       | -2.719556 |
| Total SCF energy          |           | -1732.46424108 |           | Total SCF energy          |           | -1732.45824132 |           |
| Gibbs free energy at 298K |           | -1731.81560500 |           | Gibbs free energy at 298K |           | -1731.80976900 |           |
| Free energy in solution   |           | -1732.437      |           | Free energy in solution   |           | -1732.430      |           |

**10TS-Z-Si**

Cartesian coordinates

| ATOM | X         | Y         | Z         |
|------|-----------|-----------|-----------|
| C    | -1.128086 | 1.206364  | 2.119924  |
| C    | -0.444498 | 0.171202  | 1.466180  |
| C    | -0.277079 | -1.068295 | 2.102464  |
| C    | -0.795988 | -1.279599 | 3.385278  |
| C    | -1.465897 | -0.228626 | 4.031490  |
| C    | -1.636658 | 1.016818  | 3.412700  |
| H    | -0.683688 | -2.240855 | 3.880228  |
| H    | -1.861530 | -0.385278 | 5.030599  |
| H    | -2.159505 | 1.817438  | 3.929575  |
| C    | 0.429060  | -1.981586 | 1.217168  |
| C    | 1.082658  | -3.877411 | 0.229198  |
| C    | 1.519232  | -2.672097 | -0.642431 |
| H    | 0.249340  | -4.425234 | -0.216643 |
| C    | -1.178603 | 2.377875  | 1.265707  |
| C    | -0.916488 | 3.637687  | -0.587744 |
| C    | -1.369529 | 4.508325  | 0.611207  |
| H    | 0.028575  | 4.007886  | -0.994506 |
| H    | -2.252789 | 5.119274  | 0.419784  |
| N    | -0.668392 | 2.334256  | 0.062525  |
| N    | 0.894003  | -1.542013 | 0.079904  |

**11TS-Z-Re**

Cartesian coordinates

| ATOM | X         | Y         | Z         |
|------|-----------|-----------|-----------|
| C    | -1.123096 | 0.391518  | 2.229969  |
| C    | -0.204846 | -0.358442 | 1.478436  |
| C    | 0.345722  | -1.529732 | 2.020177  |
| C    | -0.033103 | -1.970591 | 3.294914  |
| C    | -0.949185 | -1.207833 | 4.032522  |
| C    | -1.493764 | -0.022957 | 3.515569  |
| H    | 0.375511  | -2.887304 | 3.712281  |
| H    | -1.240226 | -1.538546 | 5.025063  |
| H    | -2.193174 | 0.560879  | 4.108469  |
| C    | 1.251726  | -2.133635 | 1.060424  |
| C    | 2.385537  | -3.702534 | -0.063988 |
| C    | 2.406971  | -2.373895 | -0.869174 |
| H    | 1.753191  | -4.469233 | -0.522171 |
| C    | -1.508026 | 1.582167  | 1.492335  |
| C    | -1.603778 | 3.056709  | -0.216308 |
| C    | -2.086781 | 3.703715  | 1.104489  |
| H    | -0.764499 | 3.618076  | -0.632800 |
| H    | -3.053830 | 4.201690  | 1.039480  |
| N    | -1.084161 | 1.755194  | 0.268744  |
| N    | 1.533379  | -1.507178 | -0.050451 |

|    |           |           |           |    |           |           |           |
|----|-----------|-----------|-----------|----|-----------|-----------|-----------|
| H  | -0.566822 | 5.143586  | 0.999024  | H  | -1.350369 | 4.390931  | 1.534281  |
| H  | 1.037790  | -2.739399 | -1.620305 | H  | 1.924592  | -2.517631 | -1.843624 |
| H  | 1.887943  | -4.565706 | 0.489459  | H  | 3.373042  | -4.121093 | 0.134774  |
| O  | 0.594147  | -3.287007 | 1.473752  | O  | 1.786440  | -3.356051 | 1.217010  |
| O  | -1.711170 | 3.550773  | 1.652644  | O  | -2.224405 | 2.585205  | 2.030164  |
| Rh | 0.286600  | 0.438383  | -0.363720 | Rh | 0.337527  | 0.257030  | -0.333818 |
| Si | 2.404364  | 1.374982  | 0.355501  | Si | 2.144112  | 1.703968  | 0.395791  |
| C  | -1.936096 | 3.550451  | -1.751160 | C  | -2.690485 | 2.926307  | -1.313220 |
| H  | -1.558175 | 2.764450  | -2.417154 | H  | -2.339530 | 2.149568  | -1.999461 |
| C  | 3.042253  | -2.507540 | -0.839607 | C  | 3.808901  | -1.773405 | -1.121282 |
| H  | 3.185394  | -1.513658 | -1.277394 | H  | 3.636325  | -0.756517 | -1.490417 |
| H  | -2.228920 | 0.553987  | -1.603967 | H  | -0.435283 | -2.098069 | -1.601806 |
| C  | -1.487737 | -0.221639 | -1.743139 | C  | -0.894515 | -1.133126 | -1.778214 |
| C  | -0.365800 | 0.027309  | -2.562954 | C  | -0.221911 | -0.183345 | -2.572018 |
| C  | -1.949625 | -1.579400 | -1.435644 | C  | -2.343672 | -1.100137 | -1.552633 |
| O  | -1.361640 | -2.624191 | -1.694256 | O  | -3.112072 | -0.215861 | -1.905145 |
| O  | -3.171333 | -1.521505 | -0.839191 | O  | -2.726846 | -2.246711 | -0.924330 |
| C  | -3.925604 | -2.725020 | -0.479913 | C  | -4.129462 | -2.552074 | -0.637198 |
| C  | -3.351822 | 3.155442  | -1.304888 | C  | -4.057569 | 2.470439  | -0.783026 |
| H  | -3.987876 | 2.979675  | -2.179649 | H  | -4.705266 | 2.193527  | -1.620234 |
| H  | -3.352587 | 2.240506  | -0.704239 | H  | -3.967260 | 1.589097  | -0.144329 |
| H  | -3.828977 | 3.946894  | -0.713758 | H  | -4.566194 | 3.263575  | -0.219529 |
| C  | -1.950809 | 4.865992  | -2.546327 | C  | -2.814142 | 4.249219  | -2.086493 |
| H  | -2.618227 | 4.785927  | -3.411371 | H  | -3.560359 | 4.160511  | -2.883875 |
| H  | -2.310309 | 5.705073  | -1.936105 | H  | -3.133341 | 5.073024  | -1.432852 |
| H  | -0.951321 | 5.124218  | -2.916104 | H  | -1.862289 | 4.539624  | -2.547994 |
| C  | 3.557457  | -3.562374 | -1.831874 | C  | 4.541551  | -2.580011 | -2.205015 |
| H  | 4.625038  | -3.415388 | -2.031659 | H  | 5.511139  | -2.123995 | -2.434427 |
| H  | 3.437806  | -4.583264 | -1.443470 | H  | 4.737123  | -3.613264 | -1.886114 |
| H  | 3.026887  | -3.506225 | -2.790197 | H  | 3.965203  | -2.621702 | -3.137632 |
| C  | 3.839303  | -2.540277 | 0.471552  | C  | 4.656154  | -1.651152 | 0.152164  |
| H  | 3.813181  | -3.527189 | 0.951558  | H  | 4.945733  | -2.629098 | 0.558301  |
| H  | 4.891398  | -2.303695 | 0.277961  | H  | 5.581366  | -1.107207 | -0.066366 |
| H  | 3.464264  | -1.800682 | 1.184766  | H  | 4.127067  | -1.096120 | 0.931819  |
| C  | 2.774950  | 1.139589  | 2.219178  | C  | 2.677013  | 1.396117  | 2.208148  |
| H  | 3.746716  | 1.567872  | 2.496859  | H  | 3.550832  | 2.000477  | 2.483579  |
| H  | 2.007128  | 1.639807  | 2.820866  | H  | 1.859321  | 1.666795  | 2.886583  |
| H  | 2.779264  | 0.083952  | 2.511127  | H  | 2.920193  | 0.345514  | 2.397727  |
| C  | 2.532877  | 3.262404  | 0.062568  | C  | 1.801008  | 3.583906  | 0.307654  |
| H  | 3.527723  | 3.637963  | 0.334022  | H  | 2.691215  | 4.155834  | 0.598470  |
| H  | 2.359930  | 3.511449  | -0.989862 | H  | 1.524605  | 3.894157  | -0.705454 |
| H  | 1.804630  | 3.807423  | 0.674036  | H  | 0.997734  | 3.874526  | 0.993828  |
| O  | 3.723732  | 0.681860  | -0.521100 | O  | 3.531824  | 1.446900  | -0.606320 |
| C  | 5.073019  | 0.953604  | -0.174217 | C  | 4.788338  | 2.036086  | -0.306573 |

|                           |           |                |           |                           |           |                |           |
|---------------------------|-----------|----------------|-----------|---------------------------|-----------|----------------|-----------|
| C                         | 5.978369  | 0.545795       | -1.330238 | C                         | 5.676513  | 1.979266       | -1.543771 |
| H                         | 5.353608  | 0.399269       | 0.735684  | H                         | 5.272450  | 1.503237       | 0.527621  |
| H                         | 5.221784  | 2.023661       | 0.044166  | H                         | 4.673462  | 3.085666       | 0.008565  |
| H                         | 7.030916  | 0.733736       | -1.084779 | H                         | 6.659319  | 2.420578       | -1.337137 |
| H                         | 5.859995  | -0.520135      | -1.553561 | H                         | 5.824271  | 0.942428       | -1.865671 |
| H                         | 5.722937  | 1.111171       | -2.232795 | H                         | 5.213416  | 2.527729       | -2.370906 |
| C                         | -4.230940 | -3.555890      | -1.733090 | C                         | -4.716920 | -1.518554      | 0.331053  |
| H                         | -3.316617 | -3.962014      | -2.168040 | H                         | -4.812324 | -0.544286      | -0.149319 |
| H                         | -4.898868 | -4.385335      | -1.472908 | H                         | -5.708768 | -1.845529      | 0.664925  |
| H                         | -4.734855 | -2.937460      | -2.484465 | H                         | -4.074936 | -1.417841      | 1.213290  |
| C                         | -3.171655 | -3.535166      | 0.581368  | C                         | -4.931584 | -2.640813      | -1.942036 |
| H                         | -2.923770 | -2.901206      | 1.439343  | H                         | -4.467502 | -3.361448      | -2.624866 |
| H                         | -3.803740 | -4.358261      | 0.935106  | H                         | -5.950513 | -2.983521      | -1.727372 |
| H                         | -2.249175 | -3.952605      | 0.175773  | H                         | -4.983089 | -1.669740      | -2.436814 |
| C                         | -5.217682 | -2.147986      | 0.108437  | C                         | -4.043389 | -3.926910      | 0.034778  |
| H                         | -5.886897 | -2.957124      | 0.420861  | H                         | -5.045094 | -4.284260      | 0.297299  |
| H                         | -4.998100 | -1.522238      | 0.979785  | H                         | -3.580295 | -4.655948      | -0.638542 |
| H                         | -5.738169 | -1.533949      | -0.633980 | H                         | -3.442705 | -3.872345      | 0.948688  |
| H                         | 1.142548  | 0.704696       | -1.798185 | H                         | 0.929406  | 0.970280       | -1.750482 |
| H                         | 0.169526  | -0.823022      | -2.973894 | H                         | 0.641254  | -0.497948      | -3.148705 |
| H                         | -0.362176 | 0.912184       | -3.190129 | H                         | -0.800524 | 0.621246       | -3.014621 |
| Total SCF energy          |           | -1732.46203321 |           | Total SCF energy          |           | -1732.45396191 |           |
| Gibbs free energy at 298K |           | -1731.81400100 |           | Gibbs free energy at 298K |           | -1731.80752200 |           |
| Imaginary frequency       |           | -516.390       |           | Imaginary frequency       |           | -537.938       |           |
| Free energy in solution   |           | -1732.43422400 |           | Free energy in solution   |           | -1732.42746200 |           |

### 10TS-E-Si

Cartesian coordinates

| ATOM | X         | Y         | Z         |
|------|-----------|-----------|-----------|
| C    | -1.756148 | -0.931439 | 2.164176  |
| C    | -0.568886 | -0.412869 | 1.628082  |
| C    | 0.559157  | -0.261601 | 2.447959  |
| C    | 0.510804  | -0.636766 | 3.796124  |
| C    | -0.686487 | -1.148373 | 4.317529  |
| C    | -1.825913 | -1.297361 | 3.515243  |
| H    | 1.384324  | -0.534771 | 4.434819  |
| H    | -0.730929 | -1.436562 | 5.363497  |
| H    | -2.744697 | -1.694477 | 3.939013  |
| C    | -2.778989 | -0.981966 | 1.136867  |
| O    | -4.045774 | -1.364974 | 1.374894  |
| C    | -3.703122 | -0.828836 | -0.916306 |
| C    | -4.790849 | -1.06048  | 0.162108  |
| H    | -5.455774 | -1.901566 | -0.038415 |

### 11TS-E-Re

Cartesian coordinates

| ATOM | X         | Y         | Z         |
|------|-----------|-----------|-----------|
| C    | -1.203153 | -0.431254 | 2.20967   |
| C    | -0.100605 | -0.816402 | 1.431342  |
| C    | 0.621849  | -1.969539 | 1.766313  |
| C    | 0.271369  | -2.723594 | 2.892834  |
| C    | -0.810647 | -2.305893 | 3.681207  |
| C    | -1.561295 | -1.171356 | 3.344958  |
| H    | 0.81821   | -3.626706 | 3.150682  |
| H    | -1.08321  | -2.883293 | 4.559488  |
| H    | -2.409999 | -0.876448 | 3.956608  |
| C    | 1.610347  | -2.244328 | 0.738732  |
| C    | 2.909588  | -3.430674 | -0.642003 |
| C    | 2.747904  | -1.989354 | -1.197902 |
| H    | 2.359071  | -4.176595 | -1.223253 |
| C    | -1.809118 | 0.763382  | 1.653814  |

|    |           |           |           |    |           |           |           |
|----|-----------|-----------|-----------|----|-----------|-----------|-----------|
| N  | -2.498352 | -0.615934 | -0.086627 | C  | -1.921119 | 2.659492  | 0.455616  |
| H  | -3.906115 | 0.088719  | -1.47463  | C  | -3.179243 | 2.499607  | 1.328469  |
| H  | -5.387831 | -0.164414 | 0.359394  | H  | -1.230864 | 3.33887   | 0.969076  |
| Rh | -0.473153 | 0.128571  | -0.288991 | H  | -4.060123 | 2.183085  | 0.760587  |
| C  | 1.658263  | 0.289062  | 1.674565  | N  | -1.317478 | 1.305096  | 0.56981   |
| O  | 2.902095  | 0.437957  | 2.158521  | N  | 1.785054  | -1.399953 | -0.242122 |
| C  | 2.741657  | 1.119957  | -0.133059 | H  | -3.422077 | 3.374484  | 1.93232   |
| C  | 3.729278  | 0.883648  | 1.044837  | H  | 2.268246  | -2.017798 | -2.183799 |
| H  | 4.255641  | 1.782842  | 1.368272  | H  | 3.945156  | -3.75323  | -0.527346 |
| N  | 1.464222  | 0.639259  | 0.432314  | O  | 2.310073  | -3.388822 | 0.683935  |
| H  | 2.991073  | 0.460445  | -0.970019 | O  | -2.831041 | 1.416155  | 2.240912  |
| H  | 4.457189  | 0.094574  | 0.844705  | Rh | 0.313502  | 0.180046  | -0.234667 |
| C  | -3.543604 | -1.985499 | -1.935225 | Si | 1.932706  | 1.736035  | 0.688448  |
| H  | -2.617502 | -1.772338 | -2.483727 | C  | -2.09306  | 3.217054  | -0.968909 |
| C  | -4.699384 | -1.962913 | -2.948734 | H  | -1.130743 | 3.025038  | -1.461297 |
| H  | -5.666825 | -2.147384 | -2.463277 | C  | 4.057582  | -1.181386 | -1.336378 |
| H  | -4.762923 | -0.998199 | -3.466238 | H  | 3.749101  | -0.146187 | -1.517455 |
| H  | -4.563961 | -2.742115 | -3.706936 | H  | -0.053579 | -2.017336 | -1.867133 |
| C  | -3.403641 | -3.370921 | -1.285441 | C  | -0.767393 | -1.206998 | -1.770757 |
| H  | -2.621568 | -3.391949 | -0.520104 | C  | -0.472731 | -0.006845 | -2.456808 |
| H  | -4.340501 | -3.69814  | -0.817761 | C  | -2.043215 | -1.749104 | -1.28227  |
| H  | -3.144251 | -4.11849  | -2.043198 | O  | -2.11275  | -2.888939 | -0.841826 |
| C  | 2.686248  | 2.571328  | -0.661993 | O  | -3.123321 | -0.925104 | -1.401602 |
| H  | 1.787003  | 2.631503  | -1.284499 | C  | -4.472135 | -1.446835 | -1.105287 |
| C  | 3.916599  | 2.855478  | -1.538938 | C  | -3.19594  | 2.548044  | -1.797097 |
| H  | 3.862655  | 3.864022  | -1.964174 | H  | -3.121106 | 2.864649  | -2.844312 |
| H  | 4.851131  | 2.796056  | -0.963279 | H  | -3.130631 | 1.458617  | -1.761112 |
| H  | 3.992002  | 2.145913  | -2.372094 | H  | -4.195414 | 2.839253  | -1.449095 |
| C  | 2.54038   | 3.627903  | 0.441498  | C  | -2.298963 | 4.741332  | -0.916576 |
| H  | 1.713095  | 3.392696  | 1.116652  | H  | -2.347367 | 5.156134  | -1.929446 |
| H  | 3.454813  | 3.737791  | 1.038768  | H  | -3.239122 | 5.003354  | -0.412829 |
| H  | 2.329438  | 4.605033  | -0.004903 | H  | -1.481128 | 5.243916  | -0.387102 |
| C  | 0.148392  | -1.860235 | -1.262814 | C  | 4.861846  | -1.681916 | -2.546636 |
| H  | -0.752509 | -2.448446 | -1.145553 | H  | 5.760311  | -1.07118  | -2.689993 |
| C  | 1.300022  | -2.573531 | -0.688504 | H  | 5.19458   | -2.721359 | -2.418407 |
| O  | 1.167551  | -3.552407 | 0.03049   | H  | 4.274234  | -1.630895 | -3.471696 |
| O  | 2.514283  | -2.088623 | -1.083974 | C  | 4.911807  | -1.182573 | -0.06142  |
| C  | 3.731761  | -2.889281 | -0.878484 | H  | 5.325667  | -2.173876 | 0.164805  |
| C  | 4.819643  | -2.049169 | -1.556025 | H  | 5.760439  | -0.500123 | -0.180353 |
| H  | 5.781753  | -2.57037  | -1.508785 | H  | 4.337452  | -0.844008 | 0.805533  |
| H  | 4.572011  | -1.873926 | -2.60812  | C  | 2.567104  | 1.214128  | 2.418257  |
| H  | 4.935508  | -1.077116 | -1.065647 | H  | 3.368462  | 1.872384  | 2.778068  |
| C  | 3.595323  | -4.239089 | -1.596644 | H  | 1.744409  | 1.266663  | 3.141523  |
| H  | 4.542199  | -4.787265 | -1.531949 | H  | 2.94358   | 0.185982  | 2.432552  |

|                           |           |                |           |                           |           |                |           |
|---------------------------|-----------|----------------|-----------|---------------------------|-----------|----------------|-----------|
| H                         | 2.809164  | -4.846079      | -1.14554  | C                         | 1.382734  | 3.556746       | 0.925209  |
| H                         | 3.363284  | -4.084956      | -2.656493 | H                         | 2.249687  | 4.189756       | 1.154416  |
| C                         | 4.0298    | -3.070314      | 0.615936  | H                         | 0.908042  | 3.962689       | 0.02613   |
| H                         | 5.027837  | -3.506813      | 0.741809  | H                         | 0.687643  | 3.659076       | 1.766623  |
| H                         | 4.012431  | -2.106414      | 1.1353    | O                         | 3.305291  | 1.82833        | -0.366675 |
| H                         | 3.292543  | -3.722806      | 1.083764  | C                         | 4.493931  | 2.503364       | 0.014872  |
| Si                        | -1.317816 | 2.387366       | 0.034612  | C                         | 5.326962  | 2.794593       | -1.227869 |
| C                         | -3.147737 | 2.601781       | -0.486188 | H                         | 5.073943  | 1.887103       | 0.720335  |
| H                         | -3.300607 | 2.325977       | -1.535209 | H                         | 4.269187  | 3.450854       | 0.530417  |
| H                         | -3.808312 | 1.988178       | 0.136443  | H                         | 6.259586  | 3.30653        | -0.960189 |
| H                         | -3.471903 | 3.643605       | -0.368636 | H                         | 5.580575  | 1.864722       | -1.748847 |
| C                         | -1.262742 | 2.990417       | 1.851432  | H                         | 4.766288  | 3.429116       | -1.922496 |
| H                         | -1.614875 | 4.025783       | 1.946204  | C                         | -4.790753 | -2.644471      | -2.011792 |
| H                         | -1.91188  | 2.359841       | 2.470286  | H                         | -4.157652 | -3.49977       | -1.776782 |
| H                         | -0.256295 | 2.93691        | 2.279413  | H                         | -5.840174 | -2.932161      | -1.879166 |
| O                         | -0.437496 | 3.529155       | -0.921275 | H                         | -4.645238 | -2.372212      | -3.06348  |
| C                         | -0.663739 | 4.926227       | -0.821067 | C                         | -4.596497 | -1.796948      | 0.382948  |
| H                         | -1.739808 | 5.155087       | -0.757076 | H                         | -4.338271 | -0.930802      | 1.002568  |
| H                         | -0.197238 | 5.325872       | 0.093759  | H                         | -5.63269  | -2.07697       | 0.607852  |
| C                         | -0.075658 | 5.615703       | -2.046552 | H                         | -3.939424 | -2.625932      | 0.646281  |
| H                         | -0.22302  | 6.701354       | -1.991252 | C                         | -5.400872 | -0.280238      | -1.454174 |
| H                         | 0.998907  | 5.415449       | -2.121791 | H                         | -6.443911 | -0.585611      | -1.317782 |
| H                         | -0.553283 | 5.243145       | -2.958995 | H                         | -5.21262  | 0.583149       | -0.809287 |
| C                         | 0.181704  | -0.868732      | -2.263455 | H                         | -5.26538  | 0.030055       | -2.49537  |
| H                         | -0.6088   | -0.843446      | -3.005328 | H                         | 0.607514  | 1.108936       | -1.643319 |
| H                         | 1.138005  | -0.489599      | -2.607721 | H                         | 0.287908  | -0.041549      | -3.230675 |
| H                         | -0.448443 | 0.863135       | -1.801338 | H                         | -1.260804 | 0.715902       | -2.634048 |
| Total SCF energy          |           | -1732.45336602 |           | Total SCF energy          |           | -1732.44443541 |           |
| Gibbs free energy at 298K |           | -1731.80494900 |           | Gibbs free energy at 298K |           | -1731.79615500 |           |
| Imaginary frequency       |           | -384.154       |           | Imaginary frequency       |           | -699.369       |           |
| Free energy in solution   |           | -1732.42658800 |           | Free energy in solution   |           | -1732.41821900 |           |

**10b-Z-Si**

Cartesian coordinates

| ATOM | X         | Y         | Z        |
|------|-----------|-----------|----------|
| C    | -1.058309 | 1.305416  | 2.174675 |
| C    | -0.328477 | 0.263460  | 1.569115 |
| C    | -0.066413 | -0.927740 | 2.277249 |
| C    | -0.508963 | -1.060142 | 3.597126 |
| C    | -1.203678 | -0.002840 | 4.203857 |
| C    | -1.485563 | 1.176223  | 3.502610 |
| H    | -0.320131 | -1.977893 | 4.147550 |
| H    | -1.539354 | -0.105887 | 5.231081 |
| H    | -2.039614 | 1.979675  | 3.980484 |

**10b-E-Si**

Cartesian coordinates

| ATOM | X         | Y         | Z        |
|------|-----------|-----------|----------|
| C    | -1.872108 | -0.819541 | 2.179144 |
| C    | -0.685900 | -0.237465 | 1.691057 |
| C    | 0.384953  | 0.038506  | 2.566121 |
| C    | 0.254364  | -0.242188 | 3.930236 |
| C    | -0.942434 | -0.790881 | 4.412139 |
| C    | -2.004726 | -1.085035 | 3.547611 |
| H    | 1.077754  | -0.042507 | 4.610597 |
| H    | -1.042541 | -1.003668 | 5.471861 |
| H    | -2.920128 | -1.525303 | 3.933512 |

|    |           |           |           |    |           |           |           |
|----|-----------|-----------|-----------|----|-----------|-----------|-----------|
| C  | -1.254895 | 2.388991  | 1.239983  | C  | -2.798631 | -1.055380 | 1.096444  |
| O  | -1.832463 | 3.559948  | 1.560781  | O  | -4.056576 | -1.496043 | 1.269661  |
| C  | -1.154812 | 3.491689  | -0.727727 | C  | -3.550269 | -1.113242 | -1.031576 |
| C  | -1.640760 | 4.430397  | 0.410357  | C  | -4.706018 | -1.371715 | -0.026886 |
| H  | -2.592372 | 4.923779  | 0.207077  | H  | -5.260734 | -2.293415 | -0.208208 |
| N  | -0.823203 | 2.259553  | 0.014627  | N  | -2.429780 | -0.788591 | -0.126919 |
| H  | -0.235269 | 3.882689  | -1.175323 | H  | -3.766996 | -0.229459 | -1.640728 |
| H  | -0.894493 | 5.180961  | 0.686867  | H  | -5.405603 | -0.533010 | 0.035744  |
| Rh | 0.205466  | 0.400221  | -0.262842 | Rh | -0.467631 | 0.075886  | -0.181260 |
| C  | 0.614181  | -1.880429 | 1.424860  | C  | 1.516276  | 0.557149  | 1.829691  |
| O  | 0.899571  | -3.141984 | 1.778864  | O  | 2.714131  | 0.823327  | 2.374256  |
| C  | 1.549579  | -2.671832 | -0.481189 | C  | 2.693439  | 1.195857  | 0.001997  |
| C  | 1.336878  | -3.809851 | 0.554301  | C  | 3.595495  | 1.186732  | 1.270723  |
| H  | 2.237995  | -4.375435 | 0.795514  | H  | 4.034445  | 2.156952  | 1.509670  |
| N  | 0.933782  | -1.520362 | 0.213852  | N  | 1.396010  | 0.746489  | 0.545581  |
| H  | 0.941810  | -2.869179 | -1.367451 | H  | 3.025482  | 0.421596  | -0.695290 |
| H  | 0.538218  | -4.494795 | 0.258270  | H  | 4.386350  | 0.434434  | 1.226056  |
| C  | -2.178740 | 3.263847  | -1.866658 | C  | -3.245932 | -2.290336 | -1.991031 |
| H  | -1.746007 | 2.482942  | -2.504782 | H  | -2.332859 | -2.006907 | -2.530278 |
| C  | -2.316786 | 4.536068  | -2.718795 | C  | -4.371600 | -2.432406 | -3.028438 |
| H  | -2.742433 | 5.367885  | -2.142217 | H  | -5.321970 | -2.720600 | -2.560254 |
| H  | -1.347991 | 4.863983  | -3.114958 | H  | -4.537216 | -1.496706 | -3.576203 |
| H  | -2.983317 | 4.358301  | -3.569817 | H  | -4.123298 | -3.209255 | -3.759682 |
| C  | -3.545731 | 2.768046  | -1.372538 | C  | -2.978447 | -3.619321 | -1.269120 |
| H  | -3.453861 | 1.865372  | -0.760853 | H  | -2.175852 | -3.531723 | -0.530372 |
| H  | -4.067499 | 3.530182  | -0.779973 | H  | -3.874195 | -3.992903 | -0.756981 |
| H  | -4.189630 | 2.526917  | -2.225580 | H  | -2.678493 | -4.385681 | -1.992465 |
| C  | 3.009843  | -2.414527 | -0.916488 | C  | 2.623652  | 2.537575  | -0.763560 |
| H  | 3.002361  | -1.443067 | -1.424728 | H  | 1.772686  | 2.445486  | -1.448561 |
| C  | 3.452248  | -3.491444 | -1.920091 | C  | 3.903025  | 2.732889  | -1.593446 |
| H  | 4.466975  | -3.290160 | -2.282090 | H  | 3.840290  | 3.650153  | -2.189639 |
| H  | 3.462274  | -4.491072 | -1.464149 | H  | 4.791474  | 2.822770  | -0.952976 |
| H  | 2.785830  | -3.529628 | -2.790007 | H  | 4.070966  | 1.896008  | -2.281960 |
| C  | 3.999821  | -2.303851 | 0.250454  | C  | 2.352520  | 3.757090  | 0.126445  |
| H  | 3.668413  | -1.569595 | 0.989294  | H  | 1.481065  | 3.601192  | 0.766234  |
| H  | 4.149994  | -3.264389 | 0.760243  | H  | 3.211898  | 4.007932  | 0.761643  |
| H  | 4.978851  | -1.977975 | -0.117728 | H  | 2.146337  | 4.633665  | -0.496944 |
| C  | -1.291556 | -0.358216 | -1.697692 | C  | 0.360833  | -1.664988 | -1.248521 |
| H  | -2.092323 | 0.372642  | -1.715768 | H  | -0.492075 | -2.331983 | -1.321145 |
| C  | -1.792437 | -1.706353 | -1.463376 | C  | 1.464833  | -2.430483 | -0.672894 |
| O  | -1.242432 | -2.762317 | -1.780634 | O  | 1.309983  | -3.415226 | 0.040776  |
| O  | -2.995613 | -1.661550 | -0.810893 | O  | 2.715917  | -1.948999 | -1.001581 |
| C  | -3.725082 | -2.870795 | -0.442057 | C  | 3.918557  | -2.722767 | -0.684822 |
| C  | -4.968270 | -2.315272 | 0.262398  | C  | 5.047187  | -1.882905 | -1.294616 |



|                           |           |                |           |                           |           |                |           |
|---------------------------|-----------|----------------|-----------|---------------------------|-----------|----------------|-----------|
| H                         | -5.623658 | -3.133153      | 0.581930  | H                         | 6.010927  | -2.384879      | -1.156000 |
| H                         | -4.682944 | -1.732478      | 1.144600  | H                         | 4.883553  | -1.737383      | -2.367683 |
| H                         | -5.531950 | -1.662439      | -0.412433 | H                         | 5.106935  | -0.896577      | -0.821024 |
| C                         | -2.903900 | -3.730221      | 0.528520  | C                         | 3.860422  | -4.094420      | -1.372410 |
| H                         | -3.519256 | -4.555120      | 0.907092  | H                         | 4.809433  | -4.623612      | -1.226378 |
| H                         | -2.026692 | -4.144252      | 0.029815  | H                         | 3.051768  | -4.700488      | -0.962252 |
| H                         | -2.575453 | -3.129045      | 1.383809  | H                         | 3.701798  | -3.971469      | -2.449924 |
| C                         | -4.128706 | -3.654884      | -1.698734 | C                         | 4.107059  | -2.859215      | 0.832607  |
| H                         | -4.776927 | -4.495132      | -1.422824 | H                         | 5.084585  | -3.308441      | 1.046221  |
| H                         | -4.685697 | -3.007437      | -2.385536 | H                         | 4.074583  | -1.876035      | 1.315908  |
| H                         | -3.249251 | -4.041393      | -2.216034 | H                         | 3.322920  | -3.480724      | 1.264947  |
| Si                        | 2.321486  | 1.475271       | 0.447182  | Si                        | -1.466794 | 2.327853       | 0.078455  |
| C                         | 2.303216  | 3.393015       | 0.358354  | C                         | -3.359506 | 2.427464       | -0.229290 |
| H                         | 2.072531  | 3.747746       | -0.652754 | H                         | -3.632919 | 2.075891       | -1.230942 |
| H                         | 1.549633  | 3.800929       | 1.043008  | H                         | -3.895142 | 1.813480       | 0.505017  |
| H                         | 3.269804  | 3.824911       | 0.647398  | H                         | -3.737856 | 3.452554       | -0.126457 |
| C                         | 2.969577  | 1.104422       | 2.210074  | C                         | -1.245378 | 3.230342       | 1.754176  |
| H                         | 3.973522  | 1.516992       | 2.373361  | H                         | -1.556267 | 4.281855       | 1.699770  |
| H                         | 2.300671  | 1.564735       | 2.947566  | H                         | -1.872117 | 2.742035       | 2.510697  |
| H                         | 3.008638  | 0.033324       | 2.433020  | H                         | -0.215311 | 3.206241       | 2.123899  |
| O                         | 3.505136  | 0.949573       | -0.705308 | O                         | -0.714317 | 3.264158       | -1.173289 |
| C                         | 4.858382  | 1.376131       | -0.643994 | C                         | -1.080167 | 4.609822       | -1.440757 |
| H                         | 4.921845  | 2.470199       | -0.529961 | H                         | -2.174678 | 4.714639       | -1.508026 |
| H                         | 5.360541  | 0.931254       | 0.230319  | H                         | -0.743326 | 5.269063       | -0.623997 |
| C                         | 5.575758  | 0.956804       | -1.920958 | C                         | -0.446734 | 5.050513       | -2.754616 |
| H                         | 6.626765  | 1.270002       | -1.897144 | H                         | -0.707443 | 6.091240       | -2.983059 |
| H                         | 5.541684  | -0.131536      | -2.041685 | H                         | 0.644699  | 4.970910       | -2.701331 |
| H                         | 5.096027  | 1.410395       | -2.795013 | H                         | -0.793380 | 4.415380       | -3.577085 |
| C                         | -0.210928 | -0.176869      | -2.743182 | C                         | 0.546630  | -0.759690      | -2.453862 |
| H                         | -0.529046 | 0.445100       | -3.588984 | H                         | 0.108359  | -1.171702      | -3.372907 |
| H                         | 0.143472  | -1.142497      | -3.114091 | H                         | 1.598781  | -0.530740      | -2.636000 |
| H                         | 0.720022  | 0.349743       | -2.363640 | H                         | 0.036741  | 0.242112       | -2.343198 |
| Total SCF energy          |           | -1732.48747944 |           | Total SCF energy          |           | -1732.47883164 |           |
| Gibbs free energy at 298K |           | -1731.83744100 |           | Gibbs free energy at 298K |           | -1731.83132600 |           |
| Free energy in solution   |           | -1732.45962700 |           | Free energy in solution   |           | -1732.45171700 |           |

**11b-Z-Re**

Cartesian coordinates

| ATOM | X         | Y         | Z        |
|------|-----------|-----------|----------|
| C    | -1.406912 | 0.232434  | 2.041713 |
| C    | -0.431125 | -0.491051 | 1.333158 |
| C    | -0.069145 | -1.791047 | 1.732443 |
| C    | -0.667341 | -2.359064 | 2.863355 |
| C    | -1.613186 | -1.619783 | 3.586705 |

**12a-E-Si**

Cartesian coordinates

| ATOM | X         | Y         | Z        |
|------|-----------|-----------|----------|
| C    | 2.265240  | -1.535616 | 1.737635 |
| C    | 0.918876  | -1.189507 | 1.563650 |
| C    | -0.009610 | -1.486974 | 2.570005 |
| C    | 0.389356  | -2.162279 | 3.730755 |
| C    | 1.732795  | -2.541871 | 3.865875 |

|    |           |           |           |    |           |           |           |
|----|-----------|-----------|-----------|----|-----------|-----------|-----------|
| C  | -1.991074 | -0.331487 | 3.182220  | C  | 2.682161  | -2.226980 | 2.882948  |
| H  | -0.404797 | -3.366715 | 3.173748  | H  | -0.323342 | -2.385188 | 4.520662  |
| H  | -2.069869 | -2.056713 | 4.469268  | H  | 2.048006  | -3.073703 | 4.758659  |
| H  | -2.735580 | 0.224100  | 3.745809  | H  | 3.724093  | -2.504599 | 3.020596  |
| C  | -1.630824 | 1.527028  | 1.433285  | C  | 3.050561  | -1.012048 | 0.629784  |
| O  | -2.396483 | 2.477584  | 1.993089  | O  | 4.378376  | -1.179046 | 0.528225  |
| C  | -1.194851 | 3.298488  | 0.114985  | C  | 3.526551  | 0.228504  | -1.190955 |
| C  | -2.386219 | 3.593864  | 1.056018  | C  | 4.755524  | -0.610783 | -0.760166 |
| H  | -3.348887 | 3.593142  | 0.538014  | H  | 5.666830  | -0.030735 | -0.609439 |
| N  | -0.993501 | 1.843062  | 0.339523  | N  | 2.471241  | -0.316404 | -0.311187 |
| H  | -0.294804 | 3.786856  | 0.506626  | H  | 3.263368  | 0.015590  | -2.231628 |
| H  | -2.278183 | 4.510434  | 1.637371  | H  | 4.962286  | -1.445499 | -1.437692 |
| Rh | 0.323404  | 0.257334  | -0.251719 | Rh | 0.347532  | -0.129617 | -0.021302 |
| C  | 0.861623  | -2.365441 | 0.785029  | C  | -1.306572 | -0.927685 | 2.216530  |
| O  | 1.253340  | -3.649195 | 0.798021  | O  | -2.356391 | -0.920102 | 3.052474  |
| C  | 2.121198  | -2.460669 | -1.092429 | C  | -2.878358 | 0.112238  | 0.971451  |
| C  | 1.932901  | -3.875233 | -0.471994 | C  | -3.343887 | -0.037349 | 2.441484  |
| H  | 2.867195  | -4.395447 | -0.257117 | H  | -4.322248 | -0.503995 | 2.560567  |
| N  | 1.297682  | -1.625713 | -0.195516 | N  | -1.475076 | -0.350943 | 1.056724  |
| H  | 1.664175  | -2.425406 | -2.088897 | H  | -2.868196 | 1.162370  | 0.666465  |
| H  | 1.287535  | -4.521161 | -1.073912 | H  | -3.320123 | 0.906685  | 2.995577  |
| C  | -1.346667 | 3.760806  | -1.349987 | C  | 3.697700  | 1.760978  | -1.035712 |
| H  | -0.547423 | 3.245989  | -1.899707 | H  | 2.710129  | 2.195064  | -1.220771 |
| C  | -1.073746 | 5.273159  | -1.443647 | C  | 4.672495  | 2.292667  | -2.098410 |
| H  | -1.825161 | 5.851284  | -0.889251 | H  | 5.690551  | 1.906068  | -1.954422 |
| H  | -0.086169 | 5.536841  | -1.046093 | H  | 4.352564  | 2.021979  | -3.112414 |
| H  | -1.115360 | 5.604632  | -2.486868 | H  | 4.732860  | 3.385429  | -2.048952 |
| C  | -2.685874 | 3.405581  | -2.010749 | C  | 4.107103  | 2.189318  | 0.380044  |
| H  | -2.936924 | 2.347553  | -1.896485 | H  | 3.359638  | 1.877572  | 1.114662  |
| H  | -3.508309 | 4.009104  | -1.604448 | H  | 5.085154  | 1.786243  | 0.673995  |
| H  | -2.634757 | 3.629602  | -3.083226 | H  | 4.176948  | 3.281550  | 0.430806  |
| C  | 3.582007  | -1.973157 | -1.229231 | C  | -3.715706 | -0.679099 | -0.060036 |
| H  | 3.519114  | -0.899633 | -1.441270 | H  | -3.150354 | -0.639542 | -0.996017 |
| C  | 4.262096  | -2.674924 | -2.415350 | C  | -5.073171 | 0.008980  | -0.274452 |
| H  | 5.279796  | -2.294109 | -2.555979 | H  | -5.647357 | -0.507642 | -1.051914 |
| H  | 4.340777  | -3.759509 | -2.257537 | H  | -5.687288 | 0.005205  | 0.636786  |
| H  | 3.713149  | -2.511964 | -3.351005 | H  | -4.949315 | 1.051995  | -0.590446 |
| C  | 4.406494  | -2.127476 | 0.055661  | C  | -3.886320 | -2.161412 | 0.298939  |
| H  | 3.903546  | -1.671346 | 0.912036  | H  | -2.917661 | -2.650125 | 0.439534  |
| H  | 4.614972  | -3.178345 | 0.294890  | H  | -4.484276 | -2.307767 | 1.207942  |
| H  | 5.373497  | -1.626181 | -0.060322 | H  | -4.401129 | -2.685808 | -0.513695 |
| C  | -0.952283 | -0.626887 | -1.823261 | C  | -0.157049 | 1.373237  | -1.664880 |
| H  | -0.552865 | -1.631472 | -1.951776 | H  | 0.829217  | 1.368604  | -2.132499 |
| C  | -2.385248 | -0.688136 | -1.533364 | C  | -0.192260 | 2.351040  | -0.596338 |

|                           |           |                |           |                           |           |                |           |
|---------------------------|-----------|----------------|-----------|---------------------------|-----------|----------------|-----------|
| O                         | -3.215144 | 0.199665       | -1.711956 | C                         | -1.289556 | 1.346492       | -2.675927 |
| O                         | -2.709242 | -1.907529      | -0.995853 | H                         | -1.336640 | 2.269573       | -3.275194 |
| C                         | -4.089135 | -2.274229      | -0.684378 | H                         | -1.174668 | 0.502974       | -3.362626 |
| C                         | -3.945386 | -3.701688      | -0.143601 | H                         | -2.264257 | 1.231920       | -2.191509 |
| H                         | -4.926011 | -4.106223      | 0.130817  | O                         | 0.708376  | 2.451491       | 0.267358  |
| H                         | -3.498818 | -4.357018      | -0.899098 | O                         | -1.340704 | 3.089444       | -0.523035 |
| H                         | -3.303589 | -3.712232      | 0.743760  | C                         | -1.491563 | 4.204767       | 0.415443  |
| C                         | -4.937520 | -2.269282      | -1.963721 | C                         | -2.872467 | 4.763702       | 0.054874  |
| H                         | -5.937199 | -2.665593      | -1.749786 | H                         | -3.110529 | 5.627998       | 0.684704  |
| H                         | -5.036022 | -1.257997      | -2.361416 | H                         | -2.898708 | 5.077857       | -0.993453 |
| H                         | -4.475526 | -2.905920      | -2.727010 | H                         | -3.648449 | 4.004561       | 0.202537  |
| C                         | -4.678570 | -1.355969      | 0.394376  | C                         | -0.405399 | 5.256623       | 0.152538  |
| H                         | -5.670791 | -1.720666      | 0.686839  | H                         | -0.595479 | 6.148843       | 0.760467  |
| H                         | -4.039236 | -1.357126      | 1.283479  | H                         | 0.582771  | 4.865597       | 0.400537  |
| H                         | -4.771152 | -0.333522      | 0.026451  | H                         | -0.415128 | 5.554055       | -0.902022 |
| Si                        | 2.238437  | 1.326234       | 0.936310  | C                         | -1.470852 | 3.725226       | 1.872917  |
| C                         | 2.122146  | 3.186515       | 1.402891  | H                         | -1.671231 | 4.571636       | 2.540861  |
| H                         | 1.965628  | 3.821445       | 0.523430  | H                         | -2.252401 | 2.975696       | 2.041563  |
| H                         | 1.293455  | 3.358738       | 2.100776  | H                         | -0.503782 | 3.290465       | 2.126743  |
| H                         | 3.035570  | 3.535036       | 1.901916  | Si                        | -0.001401 | -1.990407      | -1.441018 |
| C                         | 2.752643  | 0.504631       | 2.590682  | C                         | 1.242612  | -2.012899      | -2.889655 |
| H                         | 3.727416  | 0.862761       | 2.946450  | H                         | 1.227125  | -1.068011      | -3.442322 |
| H                         | 2.011276  | 0.753980       | 3.360400  | H                         | 2.260999  | -2.185540      | -2.525087 |
| H                         | 2.798120  | -0.587349      | 2.529499  | H                         | 1.005524  | -2.818794      | -3.596237 |
| O                         | 3.561331  | 1.207880       | -0.186168 | C                         | 0.162325  | -3.671924      | -0.552282 |
| C                         | 4.846733  | 1.742112       | 0.093101  | H                         | -0.001894 | -4.507140      | -1.245298 |
| H                         | 4.774311  | 2.786509       | 0.435486  | H                         | 1.164861  | -3.783051      | -0.124560 |
| H                         | 5.332921  | 1.171933       | 0.902005  | H                         | -0.555744 | -3.768110      | 0.269148  |
| C                         | 5.702856  | 1.684141       | -1.166279 | O                         | -1.568080 | -1.940667      | -2.151517 |
| H                         | 6.701959  | 2.095190       | -0.976145 | C                         | -2.075523 | -3.028968      | -2.913032 |
| H                         | 5.815286  | 0.650335       | -1.511487 | H                         | -1.295504 | -3.458420      | -3.562244 |
| H                         | 5.235671  | 2.261836       | -1.971263 | H                         | -2.413115 | -3.834790      | -2.242429 |
| H                         | 0.449269  | 0.908552       | -2.565902 | C                         | -3.236482 | -2.545321      | -3.772630 |
| C                         | -0.477896 | 0.360631       | -2.873670 | H                         | -3.652984 | -3.372906      | -4.359854 |
| H                         | -1.236754 | 1.121258       | -3.071204 | H                         | -4.033583 | -2.130704      | -3.146103 |
| H                         | -0.207596 | -0.124674      | -3.821730 | H                         | -2.903772 | -1.760881      | -4.460350 |
| Total SCF energy          |           | -1732.47879268 |           | Total SCF energy          |           | -1732.49106123 |           |
| Gibbs free energy at 298K |           | -1731.82996400 |           | Gibbs free energy at 298K |           | -1731.83994500 |           |
| Free energy in solution   |           | -1732.45042800 |           | Free energy in solution   |           | -1732.46380300 |           |

**13b-Z-Re**

Cartesian coordinates

| ATOM | X         | Y         | Z         |
|------|-----------|-----------|-----------|
| C    | -0.320950 | -3.033106 | -1.072302 |

**13b-E-Re**

Cartesian coordinates

| ATOM | X        | Y         | Z        |
|------|----------|-----------|----------|
| C    | 1.592061 | -1.834005 | 2.028075 |

|    |           |           |           |    |           |           |           |
|----|-----------|-----------|-----------|----|-----------|-----------|-----------|
| C  | 0.508200  | -1.907666 | -1.132057 | C  | 0.375933  | -1.214708 | 1.720943  |
| C  | 1.549184  | -1.858776 | -2.066886 | C  | -0.640249 | -1.159637 | 2.682804  |
| C  | 1.796828  | -2.946588 | -2.913102 | C  | -0.468670 | -1.763676 | 3.93515   |
| C  | 0.989632  | -4.089609 | -2.799666 | C  | 0.736251  | -2.430990 | 4.203497  |
| C  | -0.078833 | -4.143763 | -1.893535 | C  | 1.779230  | -2.464398 | 3.266015  |
| H  | 2.591177  | -2.911511 | -3.654337 | H  | -1.245252 | -1.713407 | 4.694135  |
| H  | 1.182701  | -4.941771 | -3.444604 | H  | 0.873375  | -2.912030 | 5.167425  |
| H  | -0.711538 | -5.026469 | -1.846267 | H  | 2.716608  | -2.958275 | 3.509089  |
| C  | -1.406521 | -2.785352 | -0.132336 | C  | 2.530712  | -1.633736 | 0.929886  |
| O  | -2.340821 | -3.701824 | 0.161772  | O  | 3.763676  | -2.158453 | 0.925454  |
| C  | -2.772122 | -1.623323 | 1.23488   | C  | 3.376401  | -0.787686 | -0.984753 |
| C  | -3.149027 | -3.125491 | 1.229481  | C  | 4.331852  | -1.849295 | -0.381931 |
| H  | -4.195197 | -3.329743 | 0.997898  | H  | 5.351554  | -1.497060 | -0.221102 |
| N  | -1.516708 | -1.622353 | 0.455481  | N  | 2.193312  | -0.906143 | -0.102656 |
| H  | -2.554055 | -1.286333 | 2.252277  | H  | 3.081861  | -1.070674 | -1.999573 |
| H  | -2.875362 | -3.637085 | 2.157569  | H  | 4.355801  | -2.781889 | -0.954252 |
| Rh | 0.086778  | -0.276844 | -0.041244 | Rh | 0.161913  | -0.202746 | 0.003825  |
| C  | 2.162481  | -0.532990 | -2.040938 | C  | -1.734585 | -0.331455 | 2.18501   |
| O  | 3.053890  | -0.123070 | -2.953123 | O  | -2.766775 | 0.054993  | 2.948469  |
| C  | 2.512612  | 1.610833  | -1.402367 | C  | -2.898737 | 0.975805  | 0.751657  |
| C  | 3.166087  | 1.325029  | -2.777664 | C  | -3.453048 | 1.100729  | 2.193426  |
| H  | 4.224595  | 1.580138  | -2.841511 | H  | -4.525063 | 0.922814  | 2.285536  |
| N  | 1.786667  | 0.344068  | -1.150294 | N  | -1.699604 | 0.136399  | 0.965909  |
| H  | 1.754664  | 2.394310  | -1.47822  | H  | -2.554836 | 1.945433  | 0.382435  |
| H  | 2.627111  | 1.790035  | -3.608715 | H  | -3.199858 | 2.055478  | 2.664527  |
| C  | -3.833503 | -0.675518 | 0.627499  | C  | 3.940716  | 0.651642  | -1.031444 |
| H  | -3.353332 | 0.308328  | 0.567889  | H  | 3.114429  | 1.295662  | -1.351571 |
| C  | -5.042637 | -0.557458 | 1.568565  | C  | 5.048935  | 0.751171  | -2.091674 |
| H  | -5.577227 | -1.511382 | 1.672883  | H  | 5.926468  | 0.141582  | -1.83508  |
| H  | -4.741243 | -0.229124 | 2.570524  | H  | 4.691540  | 0.428593  | -3.077146 |
| H  | -5.760458 | 0.174437  | 1.182131  | H  | 5.389797  | 1.787605  | -2.18719  |
| C  | -4.261525 | -1.074502 | -0.792391 | C  | 4.423450  | 1.160764  | 0.334108  |
| H  | -3.403057 | -1.129636 | -1.470303 | H  | 3.625511  | 1.122867  | 1.083305  |
| H  | -4.778062 | -2.042841 | -0.816643 | H  | 5.279660  | 0.589428  | 0.716988  |
| H  | -4.955399 | -0.330615 | -1.199266 | H  | 4.742561  | 2.205235  | 0.249448  |
| C  | 3.498540  | 1.978892  | -0.268675 | C  | -3.880582 | 0.378433  | -0.283608 |
| H  | 2.914618  | 1.939833  | 0.656978  | H  | -3.278080 | 0.150844  | -1.169337 |
| C  | 4.006382  | 3.416355  | -0.463477 | C  | -4.939983 | 1.424440  | -0.665475 |
| H  | 4.650486  | 3.715092  | 0.371599  | H  | -5.600093 | 1.036281  | -1.449235 |
| H  | 4.599948  | 3.520068  | -1.382343 | H  | -5.576026 | 1.695092  | 0.188845  |
| H  | 3.175307  | 4.129016  | -0.518964 | H  | -4.477733 | 2.344378  | -1.043236 |
| C  | 4.662175  | 0.990614  | -0.112356 | C  | -4.531363 | -0.935993 | 0.168757  |
| H  | 4.302803  | -0.034255 | 0.019893  | H  | -3.779993 | -1.684752 | 0.43563   |
| H  | 5.343056  | 1.006639  | -0.973442 | H  | -5.201359 | -0.798181 | 1.027376  |

|                           |           |                |           |                           |           |                |           |
|---------------------------|-----------|----------------|-----------|---------------------------|-----------|----------------|-----------|
| H                         | 5.257190  | 1.245741       | 0.772102  | H                         | -5.132971 | -1.355080      | -0.645446 |
| C                         | -0.374482 | 1.691920       | 0.950242  | C                         | -0.142130 | 1.173603       | -1.744211 |
| H                         | 0.635548  | 2.095907       | 1.041158  | H                         | -1.229519 | 1.275926       | -1.741632 |
| C                         | -1.019017 | 2.376770       | -0.176096 | C                         | 0.483164  | 2.386110       | -1.212238 |
| C                         | -1.095407 | 1.748419       | 2.295462  | O                         | 1.554402  | 2.873370       | -1.567583 |
| H                         | -0.447084 | 1.342447       | 3.078813  | O                         | -0.253534 | 2.935934       | -0.171126 |
| H                         | -1.359677 | 2.775766       | 2.591356  | C                         | 0.172096  | 4.163394       | 0.496983  |
| H                         | -2.030127 | 1.175523       | 2.305112  | C                         | -0.934184 | 4.400143       | 1.532421  |
| O                         | -0.453894 | 2.733909       | -1.215553 | H                         | -0.728363 | 5.308322       | 2.109574  |
| Si                        | 1.350157  | -0.974835      | 1.818825  | H                         | -1.905904 | 4.518206       | 1.040171  |
| C                         | 0.250459  | -1.664709      | 3.214155  | H                         | -0.994941 | 3.556626       | 2.229477  |
| H                         | -0.527774 | -0.954840      | 3.50655   | C                         | 0.217494  | 5.329133       | -0.501462 |
| H                         | -0.227898 | -2.596985      | 2.895414  | H                         | 0.416068  | 6.267677       | 0.029744  |
| H                         | 0.852644  | -1.890678      | 4.103588  | H                         | 0.996920  | 5.171630       | -1.247739 |
| C                         | 2.619235  | -2.337704      | 1.414272  | H                         | -0.746714 | 5.425524       | -1.013675 |
| H                         | 3.235124  | -2.563784      | 2.294542  | C                         | 1.519119  | 3.964223       | 1.205615  |
| H                         | 2.108352  | -3.259839      | 1.117104  | H                         | 1.761047  | 4.851404       | 1.803216  |
| H                         | 3.289716  | -2.052457      | 0.598292  | H                         | 1.466721  | 3.103738       | 1.883633  |
| O                         | 2.207603  | 0.375305       | 2.434828  | H                         | 2.316100  | 3.794043       | 0.481707  |
| C                         | 3.064632  | 0.283631       | 3.567345  | Si                        | -0.614602 | -2.070045      | -1.208395 |
| H                         | 2.547940  | -0.203093      | 4.409587  | C                         | 0.722895  | -2.810185      | -2.348945 |
| H                         | 3.948507  | -0.329534      | 3.330614  | H                         | 1.111867  | -2.078541      | -3.06308  |
| C                         | 3.497507  | 1.684589       | 3.977967  | H                         | 1.557753  | -3.190716      | -1.751094 |
| H                         | 4.155434  | 1.643576       | 4.854494  | H                         | 0.314867  | -3.654653      | -2.919203 |
| H                         | 4.038290  | 2.174994       | 3.161527  | C                         | -1.209369 | -3.494542      | -0.091936 |
| H                         | 2.623589  | 2.296562       | 4.224022  | H                         | -1.639263 | -4.299572      | -0.702809 |
| O                         | -2.370583 | 2.563006       | 0.000228  | H                         | -0.373143 | -3.912305      | 0.479127  |
| C                         | -3.172874 | 3.319675       | -0.961321 | H                         | -1.971478 | -3.170545      | 0.622444  |
| C                         | -3.206950 | 2.620050       | -2.327136 | O                         | -1.949426 | -1.598516      | -2.176291 |
| H                         | -3.928865 | 3.121898       | -2.982961 | C                         | -2.396228 | -2.377692      | -3.28055  |
| H                         | -2.223735 | 2.638550       | -2.79782  | H                         | -1.602061 | -2.458747      | -4.0381   |
| H                         | -3.522661 | 1.576973       | -2.21244  | H                         | -2.644749 | -3.402319      | -2.958281 |
| C                         | -4.567876 | 3.315827       | -0.324925 | C                         | -3.623964 | -1.719151      | -3.894269 |
| H                         | -5.268343 | 3.890299       | -0.941274 | H                         | -3.975891 | -2.293441      | -4.759707 |
| H                         | -4.950889 | 2.293894       | -0.231045 | H                         | -4.437181 | -1.661997      | -3.162835 |
| H                         | -4.535788 | 3.762514       | 0.674234  | H                         | -3.385607 | -0.702569      | -4.224188 |
| C                         | -2.650405 | 4.759097       | -1.071033 | H                         | -0.179918 | -0.053041      | -3.522852 |
| H                         | -3.325081 | 5.352896       | -1.699132 | C                         | 0.378277  | 0.801913       | -3.129867 |
| H                         | -2.611862 | 5.223464       | -0.079102 | H                         | 1.441669  | 0.536290       | -3.11387  |
| H                         | -1.651487 | 4.777299       | -1.508498 | H                         | 0.276485  | 1.626781       | -3.85223  |
| Total SCF energy          |           | -1732.49045400 |           | Total SCF energy          |           | -1732.49134794 |           |
| Gibbs free energy at 298K |           | -1731.84113800 |           | Gibbs free energy at 298K |           | -1731.84118600 |           |
| Free energy in solution   |           | -1732.46259900 |           | Free energy in solution   |           | -1732.46354000 |           |

| iso-TS                |           |           |           | 13b-E-Si              |           |           |           |
|-----------------------|-----------|-----------|-----------|-----------------------|-----------|-----------|-----------|
| Cartesian coordinates |           |           |           | Cartesian coordinates |           |           |           |
| ATOM                  | X         | Y         | Z         | ATOM                  | X         | Y         | Z         |
| C                     | 0.584471  | -2.480896 | 1.861099  | C                     | -2.877758 | -1.305853 | -1.040091 |
| C                     | -0.276673 | -1.400077 | 1.612297  | C                     | -1.486777 | -1.487646 | -0.932487 |
| C                     | -1.141025 | -0.921474 | 2.611342  | C                     | -0.844621 | -2.464105 | -1.713342 |
| C                     | -1.192745 | -1.573404 | 3.848875  | C                     | -1.593616 | -3.307770 | -2.541179 |
| C                     | -0.375918 | -2.691240 | 4.070387  | C                     | -2.988596 | -3.159624 | -2.585579 |
| C                     | 0.523934  | -3.141629 | 3.094738  | C                     | -3.637990 | -2.153526 | -1.857220 |
| H                     | -1.846612 | -1.208189 | 4.635959  | H                     | -1.104332 | -4.058689 | -3.155762 |
| H                     | -0.421378 | -3.201385 | 5.027540  | H                     | -3.573250 | -3.818399 | -3.220426 |
| H                     | 1.179529  | -3.983270 | 3.300279  | H                     | -4.713799 | -2.024459 | -1.941967 |
| C                     | 1.484643  | -2.675660 | 0.736887  | C                     | -3.279413 | -0.123619 | -0.292275 |
| O                     | 2.415509  | -3.637270 | 0.684314  | O                     | -4.548171 | 0.291934  | -0.172951 |
| C                     | 2.451175  | -2.227559 | -1.257819 | C                     | -3.009234 | 1.763912  | 0.925733  |
| C                     | 3.059699  | -3.511055 | -0.620448 | C                     | -4.518696 | 1.453190  | 0.713373  |
| H                     | 4.135513  | -3.449506 | -0.447489 | H                     | -5.073068 | 2.253928  | 0.220845  |
| N                     | 1.404527  | -1.871373 | -0.283142 | N                     | -2.366266 | 0.600201  | 0.293525  |
| H                     | 1.963566  | -2.473342 | -2.208431 | H                     | -2.765524 | 1.752935  | 1.994015  |
| H                     | 2.833545  | -4.420497 | -1.182852 | H                     | -5.033768 | 1.169641  | 1.634969  |
| Rh                    | -0.085791 | -0.392591 | -0.007428 | Rh                    | -0.413532 | -0.175514 | 0.028567  |
| C                     | -1.772547 | 0.313970  | 2.175130  | C                     | 0.601024  | -2.323547 | -1.591386 |
| O                     | -2.492417 | 1.110594  | 2.974967  | O                     | 1.469221  | -3.028842 | -2.326506 |
| C                     | -2.132969 | 2.082124  | 0.805509  | C                     | 2.562722  | -1.360928 | -0.989066 |
| C                     | -2.723866 | 2.343835  | 2.222484  | C                     | 2.796956  | -2.490751 | -2.032387 |
| H                     | -3.799159 | 2.529433  | 2.225956  | H                     | 3.405564  | -3.317699 | -1.660859 |
| N                     | -1.555949 | 0.735463  | 0.963463  | N                     | 1.095943  | -1.412777 | -0.799954 |
| H                     | -1.298709 | 2.762124  | 0.604810  | H                     | 2.781279  | -0.378572 | -1.417317 |
| H                     | -2.214457 | 3.147530  | 2.759381  | H                     | 3.214475  | -2.131781 | -2.975873 |
| C                     | 3.444574  | -1.072697 | -1.521139 | C                     | -2.497494 | 3.102074  | 0.343457  |
| H                     | 2.830084  | -0.231445 | -1.867668 | H                     | -1.405772 | 3.043103  | 0.433118  |
| C                     | 4.412327  | -1.459017 | -2.650760 | C                     | -2.998974 | 4.279966  | 1.192565  |
| H                     | 5.071959  | -2.288534 | -2.360931 | H                     | -4.093469 | 4.372704  | 1.159227  |
| H                     | 3.877006  | -1.758064 | -3.560797 | H                     | -2.701995 | 4.173856  | 2.242951  |
| H                     | 5.054897  | -0.609902 | -2.906772 | H                     | -2.582828 | 5.224048  | 0.824105  |
| C                     | 4.186966  | -0.610477 | -0.260859 | C                     | -2.847228 | 3.293311  | -1.139105 |
| H                     | 3.480857  | -0.261554 | 0.496759  | H                     | -2.522282 | 2.441395  | -1.745398 |
| H                     | 4.820522  | -1.400731 | 0.165268  | H                     | -3.924518 | 3.434119  | -1.298050 |
| H                     | 4.842026  | 0.231884  | -0.508131 | H                     | -2.346133 | 4.185330  | -1.530796 |
| C                     | -3.122353 | 2.196536  | -0.375952 | C                     | 3.377627  | -1.468844 | 0.319488  |
| H                     | -2.586785 | 1.788242  | -1.240763 | H                     | 2.971141  | -0.688710 | 0.974115  |
| C                     | -3.438754 | 3.675138  | -0.650667 | C                     | 4.848680  | -1.125166 | 0.033328  |
| H                     | -4.084543 | 3.773925  | -1.530264 | H                     | 5.429594  | -1.122471 | 0.962195  |
| H                     | -3.965892 | 4.142061  | 0.193030  | H                     | 5.314722  | -1.859942 | -0.638512 |

|    |           |           |           |    |           |           |           |
|----|-----------|-----------|-----------|----|-----------|-----------|-----------|
| H  | -2.526085 | 4.252273  | -0.839542 | H  | 4.942213  | -0.134538 | -0.424726 |
| C  | -4.405841 | 1.374593  | -0.200538 | C  | 3.249570  | -2.812750 | 1.045601  |
| H  | -4.186309 | 0.323703  | 0.004871  | H  | 2.208514  | -3.050187 | 1.271933  |
| H  | -5.043752 | 1.762216  | 0.604788  | H  | 3.684087  | -3.641608 | 0.471053  |
| H  | -4.997524 | 1.409170  | -1.121953 | H  | 3.783884  | -2.770738 | 2.001106  |
| C  | 0.803247  | 1.739944  | -1.764792 | C  | 2.680512  | 2.324184  | 1.317645  |
| H  | 0.123742  | 0.873422  | -1.839473 | H  | 2.261897  | 2.329728  | 2.320684  |
| C  | 1.491542  | 1.919244  | -0.595808 | C  | 1.841681  | 1.957317  | 0.319499  |
| C  | 0.908287  | 2.579949  | -3.008305 | C  | 4.113725  | 2.750081  | 1.166626  |
| H  | 1.375048  | 2.047623  | -3.853186 | H  | 4.271513  | 3.797140  | 1.471452  |
| H  | -0.074359 | 2.924807  | -3.364876 | H  | 4.790801  | 2.146267  | 1.790017  |
| H  | 1.519106  | 3.464745  | -2.806969 | H  | 4.444778  | 2.652634  | 0.129145  |
| O  | 1.374067  | 1.186970  | 0.478359  | O  | 0.566304  | 1.660076  | 0.458659  |
| Si | -1.747228 | -1.818035 | -1.023984 | O  | 2.379964  | 1.862742  | -0.976452 |
| C  | -1.029775 | -3.312417 | -1.973921 | C  | 1.946260  | 2.790511  | -2.009794 |
| H  | -0.298461 | -3.001650 | -2.728141 | C  | 3.123732  | 2.826897  | -2.992050 |
| H  | -0.529517 | -3.999159 | -1.281145 | H  | 2.896928  | 3.469679  | -3.850521 |
| H  | -1.815900 | -3.881355 | -2.486092 | H  | 4.024064  | 3.208626  | -2.499537 |
| C  | -3.131368 | -2.535017 | 0.074775  | H  | 3.339825  | 1.819826  | -3.366363 |
| H  | -3.923420 | -2.991309 | -0.532768 | C  | 1.688418  | 4.188254  | -1.433077 |
| H  | -2.722439 | -3.316310 | 0.726604  | H  | 1.425461  | 4.881613  | -2.240516 |
| H  | -3.595745 | -1.779607 | 0.715900  | H  | 0.865521  | 4.169704  | -0.712595 |
| O  | -2.433586 | -0.733770 | -2.172155 | H  | 2.578769  | 4.571301  | -0.924857 |
| C  | -3.191322 | -1.177255 | -3.292051 | C  | 0.690745  | 2.248824  | -2.711292 |
| H  | -2.606875 | -1.887339 | -3.897183 | H  | 0.418198  | 2.881865  | -3.565332 |
| H  | -4.099020 | -1.706311 | -2.957893 | H  | 0.871432  | 1.233505  | -3.082718 |
| C  | -3.576897 | 0.025181  | -4.142692 | H  | -0.150023 | 2.216401  | -2.016047 |
| H  | -4.155687 | -0.291149 | -5.018925 | Si | -0.673885 | -1.639571 | 1.907462  |
| H  | -4.183582 | 0.728406  | -3.562142 | C  | -2.267477 | -1.267594 | 2.880423  |
| H  | -2.680242 | 0.550942  | -4.487396 | H  | -2.352676 | -0.216385 | 3.170621  |
| O  | 2.429904  | 2.935850  | -0.580918 | H  | -3.153867 | -1.535890 | 2.295622  |
| C  | 2.701002  | 3.707317  | 0.618029  | H  | -2.275739 | -1.871032 | 3.797253  |
| C  | 3.585120  | 2.910317  | 1.588895  | C  | -0.648714 | -3.506543 | 1.587608  |
| H  | 3.880267  | 3.537791  | 2.439566  | H  | -0.571274 | -4.029875 | 2.548252  |
| H  | 3.050798  | 2.032488  | 1.954124  | H  | -1.575334 | -3.824495 | 1.097834  |
| H  | 4.495726  | 2.577373  | 1.078417  | H  | 0.187631  | -3.826062 | 0.961834  |
| C  | 3.467781  | 4.923219  | 0.081724  | O  | 0.663382  | -1.355953 | 2.912340  |
| H  | 3.773396  | 5.581715  | 0.902898  | C  | 0.842118  | -0.127674 | 3.624214  |
| H  | 4.365380  | 4.597633  | -0.454588 | H  | 0.836759  | 0.712230  | 2.919460  |
| H  | 2.844805  | 5.496724  | -0.612979 | H  | 0.011182  | 0.015178  | 4.332745  |
| C  | 1.397562  | 4.157743  | 1.292771  | C  | 2.160880  | -0.185922 | 4.379252  |
| H  | 1.615433  | 4.846229  | 2.117815  | H  | 2.309996  | 0.733670  | 4.957718  |
| H  | 0.757892  | 4.679411  | 0.571123  | H  | 2.174208  | -1.037106 | 5.068839  |
| H  | 0.857616  | 3.294783  | 1.690405  | H  | 2.996819  | -0.291231 | 3.680461  |

|                           |                |                           |                |
|---------------------------|----------------|---------------------------|----------------|
| Total SCF energy          | -1732.46944981 | Total SCF energy          | -1732.48382048 |
| Gibbs free energy at 298K | -1731.82194900 | Gibbs free energy at 298K | -1731.83569600 |
| Imaginary frequency       | -118.290       | Free energy in solution   | -1732.45417400 |
| Free energy in solution   | -1732.44085400 |                           |                |

### Tauto-TS1

Cartesian coordinates

| ATOM | X         | Y         | Z         |
|------|-----------|-----------|-----------|
| C    | 2.099252  | -0.158441 | 2.204725  |
| C    | 0.818490  | -0.490499 | 1.726506  |
| C    | -0.237567 | -0.681375 | 2.640522  |
| C    | 0.008835  | -0.651899 | 4.017560  |
| C    | 1.312435  | -0.415951 | 4.477217  |
| C    | 2.355723  | -0.144228 | 3.581921  |
| H    | -0.804592 | -0.789013 | 4.725087  |
| H    | 1.507793  | -0.401713 | 5.545033  |
| H    | 3.347637  | 0.097863  | 3.954130  |
| C    | 2.971263  | 0.223225  | 1.110127  |
| O    | 4.287441  | 0.421914  | 1.279743  |
| C    | 3.613106  | 0.726621  | -0.994495 |
| C    | 4.842298  | 0.653813  | -0.043248 |
| H    | 5.419474  | 1.578993  | 0.000534  |
| N    | 2.492199  | 0.364705  | -0.095955 |
| H    | 3.688970  | -0.048293 | -1.766319 |
| H    | 5.513428  | -0.179500 | -0.268374 |
| Rh   | 0.380204  | -0.162483 | -0.147473 |
| C    | -1.508079 | -0.736092 | 1.941309  |
| O    | -2.690037 | -0.834070 | 2.568350  |
| C    | -2.948253 | -0.616144 | 0.199000  |
| C    | -3.710269 | -0.597055 | 1.552535  |
| H    | -4.462518 | -1.380322 | 1.655530  |
| N    | -1.538003 | -0.602972 | 0.642970  |
| H    | -3.118804 | 0.317325  | -0.343721 |
| H    | -4.165188 | 0.373295  | 1.771917  |
| C    | 3.455555  | 2.087147  | -1.715210 |
| H    | 2.559301  | 1.998483  | -2.339283 |
| C    | 4.646980  | 2.313383  | -2.662735 |
| H    | 5.587687  | 2.458924  | -2.115544 |
| H    | 4.786176  | 1.470140  | -3.351280 |
| H    | 4.484394  | 3.212870  | -3.266055 |
| C    | 3.244452  | 3.269942  | -0.761246 |
| H    | 2.298441  | 3.179613  | -0.220886 |
| H    | 4.067296  | 3.371381  | -0.040615 |
| H    | 3.202854  | 4.204057  | -1.333375 |

### Tauto-TS2

Cartesian coordinates

| ATOM | X         | Y         | Z         |
|------|-----------|-----------|-----------|
| C    | -2.588473 | -1.090177 | -1.619669 |
| C    | -1.188868 | -1.087047 | -1.452520 |
| C    | -0.352253 | -1.575530 | -2.475448 |
| C    | -0.916295 | -2.139355 | -3.624644 |
| C    | -2.312016 | -2.203002 | -3.748908 |
| C    | -3.152716 | -1.665684 | -2.765204 |
| H    | -0.278329 | -2.510577 | -4.422100 |
| H    | -2.748016 | -2.647686 | -4.638055 |
| H    | -4.230974 | -1.676703 | -2.899600 |
| C    | -3.220012 | -0.359045 | -0.538861 |
| O    | -4.543180 | -0.174798 | -0.423569 |
| C    | -3.316001 | 0.970959  | 1.287392  |
| C    | -4.743314 | 0.566781  | 0.817847  |
| H    | -5.391146 | 1.414913  | 0.590361  |
| N    | -2.466888 | 0.189646  | 0.372510  |
| H    | -3.139683 | 0.619868  | 2.310596  |
| H    | -5.252124 | -0.101623 | 1.517689  |
| Rh   | -0.411154 | -0.144518 | 0.029386  |
| C    | 1.037528  | -1.287610 | -2.169133 |
| O    | 2.053683  | -1.521262 | -3.012245 |
| C    | 2.784642  | -0.451014 | -0.996185 |
| C    | 3.209670  | -0.830573 | -2.441404 |
| H    | 4.058156  | -1.513637 | -2.496755 |
| N    | 1.328055  | -0.699820 | -1.043726 |
| H    | 2.930148  | 0.618005  | -0.819133 |
| H    | 3.403613  | 0.043336  | -3.070499 |
| C    | -2.997440 | 2.484608  | 1.241151  |
| H    | -1.930863 | 2.564974  | 1.478247  |
| C    | -3.804343 | 3.229239  | 2.315860  |
| H    | -4.883977 | 3.201186  | 2.114200  |
| H    | -3.638665 | 2.804507  | 3.313810  |
| H    | -3.510291 | 4.283843  | 2.351247  |
| C    | -3.189816 | 3.102055  | -0.150184 |
| H    | -2.541577 | 2.616892  | -0.885022 |
| H    | -4.229979 | 3.041077  | -0.498087 |
| H    | -2.919287 | 4.163584  | -0.125849 |



|    |           |           |           |    |           |           |           |
|----|-----------|-----------|-----------|----|-----------|-----------|-----------|
| C  | -3.291091 | -1.794928 | -0.743437 | C  | 3.495973  | -1.226406 | 0.138073  |
| H  | -2.520595 | -1.783921 | -1.522343 | H  | 2.919537  | -1.008484 | 1.043940  |
| C  | -4.658596 | -1.553388 | -1.402872 | C  | 4.922891  | -0.686542 | 0.322874  |
| H  | -4.887387 | -2.349600 | -2.120118 | H  | 5.416767  | -1.184237 | 1.165164  |
| H  | -5.469905 | -1.541537 | -0.661837 | H  | 5.543029  | -0.864236 | -0.566972 |
| H  | -4.683617 | -0.599067 | -1.942045 | H  | 4.919633  | 0.390509  | 0.523621  |
| C  | -3.236789 | -3.172499 | -0.070601 | C  | 3.499150  | -2.748557 | -0.054989 |
| H  | -2.271130 | -3.346441 | 0.409408  | H  | 2.490012  | -3.137102 | -0.214140 |
| H  | -4.027602 | -3.302682 | 0.679430  | H  | 4.127389  | -3.060586 | -0.899660 |
| H  | -3.373548 | -3.959643 | -0.820564 | H  | 3.897966  | -3.238101 | 0.840446  |
| C  | -0.292045 | 1.363560  | -1.646985 | C  | 1.470850  | 1.618487  | 1.968349  |
| H  | 0.667461  | 1.684297  | -2.052707 | H  | 0.654686  | 1.102307  | 2.470867  |
| C  | -0.808793 | 2.484139  | -0.850141 | C  | 1.190857  | 2.110781  | 0.726244  |
| O  | -0.122571 | 3.294809  | -0.229937 | C  | 2.769876  | 1.760902  | 2.706922  |
| O  | -2.186985 | 2.541916  | -0.838113 | H  | 2.632269  | 2.236296  | 3.690135  |
| C  | -2.895618 | 3.620714  | -0.151238 | H  | 3.248499  | 0.787954  | 2.901139  |
| C  | -4.368680 | 3.310059  | -0.443482 | H  | 3.476236  | 2.371324  | 2.137166  |
| H  | -5.014766 | 4.073963  | 0.003050  | O  | 0.043283  | 1.979722  | 0.111065  |
| H  | -4.550818 | 3.288256  | -1.523006 | O  | 2.228714  | 2.745568  | 0.048760  |
| H  | -4.654322 | 2.336545  | -0.028940 | C  | 1.968393  | 3.896621  | -0.802210 |
| C  | -2.519713 | 4.981002  | -0.756280 | C  | 3.358275  | 4.518883  | -0.985625 |
| H  | -3.150699 | 5.766829  | -0.324084 | H  | 3.306771  | 5.390978  | -1.647190 |
| H  | -1.473267 | 5.217444  | -0.561302 | H  | 3.769149  | 4.835624  | -0.021279 |
| H  | -2.684296 | 4.970107  | -1.839798 | H  | 4.047732  | 3.791106  | -1.427720 |
| C  | -2.627136 | 3.575091  | 1.359393  | C  | 1.028256  | 4.888165  | -0.104052 |
| H  | -3.265245 | 4.303019  | 1.874853  | H  | 0.933553  | 5.802613  | -0.701377 |
| H  | -2.859284 | 2.580159  | 1.757807  | H  | 0.035781  | 4.450207  | 0.025260  |
| H  | -1.581944 | 3.799926  | 1.573338  | H  | 1.424368  | 5.160407  | 0.880511  |
| Si | 0.930364  | -2.486215 | -0.272222 | C  | 1.403047  | 3.449921  | -2.159251 |
| C  | 2.748294  | -2.803845 | -0.752039 | H  | 1.310522  | 4.309512  | -2.834857 |
| H  | 3.038344  | -2.247003 | -1.648785 | H  | 2.077280  | 2.723048  | -2.628306 |
| H  | 3.418044  | -2.512371 | 0.064517  | H  | 0.425724  | 2.984025  | -2.028682 |
| H  | 2.917500  | -3.869910 | -0.949978 | Si | -0.530833 | -2.271304 | 1.171856  |
| C  | 0.563675  | -3.690560 | 1.155778  | C  | -2.099442 | -2.437425 | 2.248938  |
| H  | 0.631616  | -4.728305 | 0.804209  | H  | -2.218890 | -1.588319 | 2.930543  |
| H  | 1.300211  | -3.559585 | 1.956630  | H  | -2.992710 | -2.494003 | 1.616696  |
| H  | -0.428371 | -3.551052 | 1.593727  | H  | -2.068553 | -3.351859 | 2.854822  |
| O  | -0.064349 | -2.908448 | -1.607420 | C  | -0.435376 | -3.889010 | 0.168182  |
| C  | 0.227365  | -3.998673 | -2.473981 | H  | -0.332601 | -4.752031 | 0.838658  |
| H  | 1.208183  | -3.858263 | -2.953575 | H  | -1.352509 | -4.028305 | -0.415742 |
| H  | 0.276528  | -4.941846 | -1.905043 | H  | 0.407101  | -3.907107 | -0.529100 |
| C  | -0.857378 | -4.093837 | -3.537659 | O  | 0.830326  | -2.191676 | 2.216052  |
| H  | -0.648703 | -4.918985 | -4.229231 | C  | 0.954092  | -3.006398 | 3.376351  |
| H  | -1.834877 | -4.267107 | -3.075079 | H  | 0.123201  | -2.813703 | 4.072464  |

|                           |           |                |           |                           |          |                |          |
|---------------------------|-----------|----------------|-----------|---------------------------|----------|----------------|----------|
| H                         | -0.910307 | -3.162177      | -4.110844 | H                         | 0.910435 | -4.074758      | 3.107203 |
| C                         | -1.185422 | 0.786808       | -2.744192 | C                         | 2.278770 | -2.700282      | 4.061254 |
| H                         | -1.436247 | 1.536245       | -3.512933 | H                         | 2.390246 | -3.301669      | 4.971642 |
| H                         | -2.134291 | 0.407570       | -2.356924 | H                         | 3.117819 | -2.922768      | 3.393427 |
| H                         | -0.684403 | -0.047880      | -3.247814 | H                         | 2.329942 | -1.640749      | 4.333006 |
| Total SCF energy          |           | -1732.48050273 |           | Total SCF energy          |          | -1732.47421572 |          |
| Gibbs free energy at 298K |           | -1731.83105100 |           | Gibbs free energy at 298K |          | -1731.82548600 |          |
| Imaginary frequency       |           | -25.370        |           | Imaginary frequency       |          | -68.080        |          |
| Free energy in solution   |           | -1732.45323600 |           | Free energy in solution   |          | -1732.44489900 |          |

**14a-E-Si-Si**

Cartesian coordinates

| ATOM | X         | Y         | Z         |
|------|-----------|-----------|-----------|
| C    | -3.385314 | 1.233633  | -0.136824 |
| C    | -2.575586 | 0.115847  | 0.122494  |
| C    | -3.127369 | -1.172167 | 0.082229  |
| C    | -4.493652 | -1.347805 | -0.168089 |
| C    | -5.299982 | -0.219928 | -0.375245 |
| C    | -4.755805 | 1.071829  | -0.375289 |
| H    | -4.923964 | -2.344503 | -0.215360 |
| H    | -6.361493 | -0.350807 | -0.562281 |
| H    | -5.388433 | 1.932963  | -0.573239 |
| C    | -2.572961 | 2.438131  | -0.168589 |
| O    | -3.065232 | 3.664028  | -0.397919 |
| C    | -0.684239 | 3.680543  | -0.121991 |
| C    | -1.940715 | 4.585168  | -0.274766 |
| H    | -1.930113 | 5.209512  | -1.169915 |
| N    | -1.288717 | 2.344833  | 0.024572  |
| H    | -0.157118 | 3.920788  | 0.807205  |
| H    | -2.128317 | 5.211606  | 0.601630  |
| Rh   | -0.659691 | 0.345658  | 0.316122  |
| C    | -2.073597 | -2.164224 | 0.214319  |
| O    | -2.281320 | -3.477123 | 0.031925  |
| C    | 0.023600  | -2.975937 | 0.421905  |
| C    | -0.960467 | -4.093473 | -0.019636 |
| H    | -0.978214 | -4.962835 | 0.639234  |
| N    | -0.849253 | -1.782622 | 0.439562  |
| H    | 0.772818  | -2.821290 | -0.360931 |
| H    | -0.795066 | -4.418577 | -1.049758 |
| C    | 0.340388  | 3.758834  | -1.277798 |
| H    | 1.086821  | 2.989476  | -1.047370 |
| C    | 1.039384  | 5.128036  | -1.265329 |
| H    | 0.343298  | 5.944943  | -1.499446 |
| H    | 1.492696  | 5.344815  | -0.289624 |

**14a-E-Si-Re**

Cartesian coordinates

| ATOM | X         | Y         | Z         |
|------|-----------|-----------|-----------|
| C    | -3.581374 | -0.457680 | 0.158494  |
| C    | -2.489332 | 0.317627  | 0.571374  |
| C    | -2.603679 | 1.151553  | 1.695661  |
| C    | -3.818787 | 1.239985  | 2.383883  |
| C    | -4.916545 | 0.492598  | 1.933079  |
| C    | -4.807567 | -0.364288 | 0.830169  |
| H    | -3.910702 | 1.871125  | 3.263696  |
| H    | -5.862988 | 0.565287  | 2.460189  |
| H    | -5.659622 | -0.957697 | 0.509894  |
| C    | -3.195466 | -1.310211 | -0.950735 |
| O    | -4.049616 | -2.143602 | -1.565376 |
| C    | -1.839072 | -2.317658 | -2.439036 |
| C    | -3.320706 | -2.700004 | -2.696431 |
| H    | -3.509777 | -3.774133 | -2.714411 |
| N    | -1.969244 | -1.287140 | -1.389999 |
| H    | -1.405954 | -1.855234 | -3.332302 |
| H    | -3.726697 | -2.243657 | -3.604449 |
| Rh   | -0.763199 | 0.118874  | -0.282039 |
| C    | -1.311460 | 1.741978  | 2.006728  |
| O    | -1.057181 | 2.436500  | 3.125288  |
| C    | 0.915473  | 2.095552  | 1.799779  |
| C    | 0.391950  | 2.628048  | 3.164588  |
| H    | 0.574225  | 3.691182  | 3.328801  |
| N    | -0.308742 | 1.524762  | 1.207958  |
| H    | 1.606917  | 1.262352  | 1.958792  |
| H    | 0.767890  | 2.058298  | 4.017432  |
| C    | -0.929960 | -3.495950 | -2.014403 |
| H    | 0.036727  | -3.044359 | -1.763342 |
| C    | -0.714468 | -4.451835 | -3.198737 |
| H    | -1.642830 | -4.962427 | -3.486873 |
| H    | -0.334808 | -3.925249 | -4.083635 |

|    |           |           |           |    |           |           |           |
|----|-----------|-----------|-----------|----|-----------|-----------|-----------|
| H  | 1.835014  | 5.157735  | -2.017761 | H  | 0.010743  | -5.229376 | -2.935018 |
| C  | -0.256865 | 3.431382  | -2.652516 | C  | -1.420824 | -4.228100 | -0.758218 |
| H  | -0.644588 | 2.409488  | -2.670024 | H  | -1.426840 | -3.549499 | 0.098782  |
| H  | -1.053181 | 4.132337  | -2.937939 | H  | -2.421131 | -4.660526 | -0.893265 |
| H  | 0.522234  | 3.502209  | -3.420577 | H  | -0.741246 | -5.054637 | -0.520546 |
| C  | 0.744231  | -3.224928 | 1.766410  | C  | 1.596764  | 3.146867  | 0.895207  |
| H  | 1.220666  | -2.274736 | 2.031668  | H  | 1.689180  | 2.668725  | -0.086071 |
| C  | 1.832803  | -4.295487 | 1.591153  | C  | 3.000804  | 3.467852  | 1.432077  |
| H  | 2.395475  | -4.430372 | 2.521734  | H  | 3.518974  | 4.168897  | 0.767396  |
| H  | 1.405704  | -5.272298 | 1.325831  | H  | 2.959189  | 3.935773  | 2.425501  |
| H  | 2.546634  | -4.020597 | 0.804873  | H  | 3.616626  | 2.564327  | 1.516310  |
| C  | -0.207883 | -3.579740 | 2.916610  | C  | 0.770776  | 4.425583  | 0.701006  |
| H  | -0.994820 | -2.828830 | 3.028211  | H  | -0.244044 | 4.198308  | 0.362985  |
| H  | -0.679563 | -4.561700 | 2.781158  | H  | 0.706496  | 5.025909  | 1.618058  |
| H  | 0.345107  | -3.616928 | 3.861651  | H  | 1.235622  | 5.057413  | -0.063593 |
| C  | 2.101002  | 0.044461  | -2.459537 | C  | 1.999273  | -2.682597 | 0.807178  |
| H  | 2.199569  | 1.104497  | -2.250077 | H  | 1.630790  | -3.254872 | -0.039746 |
| C  | 0.803926  | -0.449922 | -2.389780 | C  | 1.063914  | -1.888632 | 1.435768  |
| C  | 3.233620  | -0.628909 | -3.182283 | C  | 3.360749  | -3.030742 | 1.334183  |
| H  | 3.361452  | -0.241807 | -4.206697 | H  | 3.412707  | -4.061896 | 1.721732  |
| H  | 4.193263  | -0.467179 | -2.672789 | H  | 4.130916  | -2.958441 | 0.551592  |
| H  | 3.066542  | -1.706952 | -3.260744 | H  | 3.648842  | -2.356116 | 2.144644  |
| O  | -0.219166 | 0.178525  | -1.963209 | O  | -0.135833 | -1.674492 | 1.035455  |
| O  | 0.646894  | -1.794469 | -2.766062 | O  | 1.492283  | -1.223680 | 2.601245  |
| C  | -0.243758 | -2.107742 | -3.877541 | C  | 0.947492  | -1.663467 | 3.879070  |
| C  | 0.145539  | -3.539483 | -4.261762 | C  | 1.890077  | -1.039886 | 4.914380  |
| H  | -0.481435 | -3.903325 | -5.083618 | H  | 1.555768  | -1.270595 | 5.932312  |
| H  | 1.193665  | -3.584663 | -4.575345 | H  | 2.909250  | -1.419510 | 4.786914  |
| H  | 0.015428  | -4.214623 | -3.408215 | H  | 1.918143  | 0.049849  | 4.801635  |
| C  | 0.013566  | -1.153202 | -5.053159 | C  | 0.978983  | -3.195632 | 3.993436  |
| H  | -0.596822 | -1.446946 | -5.914818 | H  | 0.636454  | -3.499952 | 4.989240  |
| H  | -0.247263 | -0.124090 | -4.788123 | H  | 0.322843  | -3.661467 | 3.252006  |
| H  | 1.066680  | -1.179449 | -5.351460 | H  | 1.993162  | -3.578711 | 3.845711  |
| C  | -1.718038 | -2.046856 | -3.451223 | C  | -0.487891 | -1.151525 | 4.075553  |
| H  | -2.364015 | -2.332888 | -4.290892 | H  | -0.875553 | -1.475357 | 5.049799  |
| H  | -1.914614 | -2.739055 | -2.625831 | H  | -0.520377 | -0.057973 | 4.049201  |
| H  | -1.979456 | -1.039636 | -3.123889 | H  | -1.138895 | -1.530724 | 3.285833  |
| Si | -0.819660 | 0.600138  | 2.693857  | Si | -1.312685 | 1.848727  | -1.865843 |
| C  | -0.529073 | 2.405397  | 3.242404  | C  | -1.801892 | 1.143517  | -3.574371 |
| H  | 0.418844  | 2.781718  | 2.843624  | H  | -1.029859 | 0.469853  | -3.961728 |
| H  | -1.337788 | 3.054347  | 2.887874  | H  | -2.744832 | 0.588588  | -3.513636 |
| H  | -0.493077 | 2.493835  | 4.335547  | H  | -1.941232 | 1.945643  | -4.310130 |
| C  | -2.454239 | 0.041300  | 3.504580  | C  | -2.719692 | 3.040066  | -1.368471 |
| H  | -2.406060 | 0.123751  | 4.598102  | H  | -2.861964 | 3.824065  | -2.123194 |

|                           |           |                |           |                           |           |                |           |
|---------------------------|-----------|----------------|-----------|---------------------------|-----------|----------------|-----------|
| H                         | -3.282634 | 0.670892       | 3.159736  | H                         | -3.665558 | 2.494906       | -1.272327 |
| H                         | -2.705807 | -0.995380      | 3.256704  | H                         | -2.525293 | 3.531094       | -0.408986 |
| O                         | 0.462539  | -0.333371      | 3.365118  | O                         | 0.112188  | 2.782634       | -2.113974 |
| C                         | 0.677706  | -0.412738      | 4.767936  | C                         | 0.121411  | 3.928471       | -2.953511 |
| H                         | 0.527333  | 0.566633       | 5.249208  | H                         | -0.447995 | 3.750034       | -3.880000 |
| H                         | -0.045054 | -1.109190      | 5.222312  | H                         | -0.357802 | 4.778198       | -2.441209 |
| C                         | 2.099456  | -0.890655      | 5.034209  | C                         | 1.561263  | 4.278942       | -3.306954 |
| H                         | 2.286147  | -0.968695      | 6.112339  | H                         | 1.598727  | 5.173046       | -3.941413 |
| H                         | 2.266509  | -1.875047      | 4.583368  | H                         | 2.142531  | 4.473695       | -2.399119 |
| H                         | 2.824081  | -0.192188      | 4.602740  | H                         | 2.035943  | 3.449520       | -3.841737 |
| H                         | 5.827322  | 3.140886       | 0.536829  | H                         | 6.246381  | -2.565030      | -2.494242 |
| C                         | 5.545466  | 2.105853       | 0.361622  | C                         | 5.677804  | -1.722486      | -2.110314 |
| C                         | 6.536498  | 1.132861       | 0.185980  | C                         | 6.327126  | -0.530778      | -1.777873 |
| C                         | 4.200674  | 1.751543       | 0.318414  | C                         | 4.297585  | -1.829277      | -1.948344 |
| C                         | 6.174527  | -0.198517      | -0.032074 | C                         | 5.592019  | 0.554141       | -1.285654 |
| H                         | 7.586099  | 1.412307       | 0.222480  | H                         | 7.403241  | -0.445625      | -1.903483 |
| C                         | 3.827188  | 0.415690       | 0.092044  | C                         | 3.554183  | -0.746338      | -1.451752 |
| H                         | 3.421691  | 2.492681       | 0.465486  | H                         | 3.786882  | -2.754956      | -2.203707 |
| C                         | 4.827203  | -0.554887      | -0.078761 | C                         | 4.214133  | 0.450457       | -1.124434 |
| H                         | 6.940907  | -0.957536      | -0.164144 | H                         | 6.098486  | 1.481737       | -1.032569 |
| H                         | 4.541865  | -1.591006      | -0.244953 | H                         | 3.627717  | 1.286380       | -0.758839 |
| C                         | 2.407725  | 0.017531       | 0.084113  | C                         | 2.093187  | -0.861926      | -1.331950 |
| H                         | 2.217023  | -1.059276      | 0.007110  | H                         | 1.652888  | -1.789327      | -1.719198 |
| O                         | 1.496954  | 0.804203       | 0.429567  | O                         | 1.364623  | 0.081757       | -0.988189 |
| Total SCF energy          |           | -2078.05962502 |           | Total SCF energy          |           | -2078.05224524 |           |
| Gibbs free energy at 298K |           | -2077.30921700 |           | Gibbs free energy at 298K |           | -2077.30085500 |           |
| Free energy in solution   |           | -2078.02240700 |           | Free energy in solution   |           | -2078.01528900 |           |

**14TS-E-Si-Si**

Cartesian coordinates

| ATOM | X         | Y         | Z         |
|------|-----------|-----------|-----------|
| C    | -3.408497 | 1.190059  | -0.143552 |
| C    | -2.584804 | 0.079317  | 0.101818  |
| C    | -3.119633 | -1.214964 | 0.038675  |
| C    | -4.482153 | -1.404874 | -0.221690 |
| C    | -5.302341 | -0.284605 | -0.415384 |
| C    | -4.775539 | 1.014162  | -0.391743 |
| H    | -4.899202 | -2.406248 | -0.286207 |
| H    | -6.361067 | -0.426562 | -0.609999 |
| H    | -5.418780 | 1.869854  | -0.578884 |
| C    | -2.612155 | 2.405759  | -0.150847 |
| O    | -3.120058 | 3.628638  | -0.361323 |
| C    | -0.740783 | 3.672859  | -0.075443 |
| C    | -2.008984 | 4.562806  | -0.215819 |

**14TS-E-Si-Re**

Cartesian coordinates

| ATOM | X        | Y         | Z         |
|------|----------|-----------|-----------|
| C    | 3.592927 | 0.470552  | 0.393012  |
| C    | 2.510368 | -0.387316 | 0.626496  |
| C    | 2.608716 | -1.382513 | 1.613684  |
| C    | 3.796683 | -1.547583 | 2.334371  |
| C    | 4.887703 | -0.712078 | 2.053897  |
| C    | 4.794585 | 0.304805  | 1.094739  |
| H    | 3.872652 | -2.305379 | 3.109567  |
| H    | 5.814347 | -0.842619 | 2.604527  |
| H    | 5.638922 | 0.963395  | 0.909741  |
| C    | 3.224270 | 1.483788  | -0.579682 |
| O    | 4.090339 | 2.406650  | -1.026462 |
| C    | 1.914128 | 2.693668  | -1.954976 |
| C    | 3.398051 | 3.130393  | -2.082288 |

|    |           |           |           |    |           |           |           |
|----|-----------|-----------|-----------|----|-----------|-----------|-----------|
| H  | -2.003855 | 5.204617  | -1.098594 | H  | 3.566371  | 4.195419  | -1.916545 |
| N  | -1.327396 | 2.326610  | 0.046225  | N  | 2.012602  | 1.521611  | -1.058931 |
| H  | -0.219047 | 3.903867  | 0.858953  | H  | 1.532585  | 2.358832  | -2.924933 |
| H  | -2.208666 | 5.169506  | 0.671760  | H  | 3.850735  | 2.835248  | -3.033797 |
| Rh | -0.671650 | 0.331342  | 0.309623  | Rh | 0.795783  | -0.086853 | -0.238214 |
| C  | -2.054049 | -2.195444 | 0.164234  | C  | 1.324163  | -2.046063 | 1.776704  |
| O  | -2.245543 | -3.508729 | -0.033312 | O  | 1.055276  | -2.918221 | 2.758442  |
| C  | 0.050815  | -2.985965 | 0.378721  | C  | -0.878343 | -2.437021 | 1.418288  |
| C  | -0.917898 | -4.110493 | -0.079239 | C  | -0.382486 | -3.174663 | 2.696291  |
| H  | -0.931383 | -4.984848 | 0.573047  | H  | -0.517635 | -4.256893 | 2.665014  |
| N  | -0.835419 | -1.802171 | 0.400879  | N  | 0.342430  | -1.731259 | 0.983177  |
| H  | 0.804835  | -2.815868 | -0.396271 | H  | -1.615704 | -1.670610 | 1.677514  |
| H  | -0.741547 | -4.427078 | -1.110353 | H  | -0.820372 | -2.782543 | 3.617337  |
| C  | 0.285474  | 3.784796  | -1.226762 | C  | 0.965141  | 3.790552  | -1.418148 |
| H  | 1.040506  | 3.020821  | -1.007096 | H  | -0.010319 | 3.304645  | -1.306505 |
| C  | 0.966955  | 5.162271  | -1.188412 | C  | 0.812151  | 4.914449  | -2.455850 |
| H  | 0.261354  | 5.974352  | -1.410769 | H  | 1.748830  | 5.468124  | -2.601852 |
| H  | 1.414474  | 5.367663  | -0.207641 | H  | 0.497537  | 4.525564  | -3.432464 |
| H  | 1.764712  | 5.215104  | -1.937347 | H  | 0.059076  | 5.638421  | -2.126030 |
| C  | -0.304194 | 3.474995  | -2.608863 | C  | 1.369015  | 4.328301  | -0.038626 |
| H  | -0.682460 | 2.450208  | -2.646006 | H  | 1.345806  | 3.529839  | 0.707871  |
| H  | -1.106636 | 4.172735  | -2.884638 | H  | 2.367128  | 4.785789  | -0.047716 |
| H  | 0.476343  | 3.566774  | -3.373216 | H  | 0.663002  | 5.103601  | 0.280971  |
| C  | 0.765357  | -3.240449 | 1.725442  | C  | -1.483959 | -3.349522 | 0.327896  |
| H  | 1.229080  | -2.287704 | 2.003376  | H  | -1.592029 | -2.713739 | -0.556716 |
| C  | 1.867379  | -4.296449 | 1.545839  | C  | -2.874542 | -3.835554 | 0.767425  |
| H  | 2.425381  | -4.434808 | 2.478704  | H  | -3.345979 | -4.425665 | -0.026537 |
| H  | 1.453507  | -5.275293 | 1.267201  | H  | -2.819229 | -4.476826 | 1.658167  |
| H  | 2.583288  | -4.004551 | 0.767660  | H  | -3.540995 | -2.996913 | 1.002675  |
| C  | -0.190113 | -3.618547 | 2.865346  | C  | -0.582854 | -4.530173 | -0.057979 |
| H  | -0.985659 | -2.877318 | 2.980419  | H  | 0.420439  | -4.194307 | -0.332838 |
| H  | -0.650107 | -4.604082 | 2.716207  | H  | -0.495026 | -5.270605 | 0.747984  |
| H  | 0.357332  | -3.660226 | 3.813393  | H  | -1.001552 | -5.050077 | -0.926351 |
| C  | 2.138008  | 0.140319  | -2.399789 | C  | -2.064965 | 2.409320  | 0.792111  |
| H  | 2.192359  | 1.204855  | -2.197905 | H  | -1.536953 | 3.171995  | 0.227534  |
| C  | 0.846505  | -0.389493 | -2.390170 | C  | -1.201735 | 1.638727  | 1.601871  |
| C  | 3.295027  | -0.484151 | -3.130274 | C  | -3.465004 | 2.761279  | 1.230932  |
| H  | 3.386294  | -0.106807 | -4.162038 | H  | -3.474507 | 3.516897  | 2.032541  |
| H  | 4.249825  | -0.264154 | -2.635871 | H  | -4.046077 | 3.173682  | 0.398564  |
| H  | 3.184350  | -1.570615 | -3.191939 | H  | -3.998909 | 1.882587  | 1.604073  |
| O  | -0.202448 | 0.199449  | -1.983838 | O  | 0.032552  | 1.484400  | 1.412229  |
| O  | 0.746154  | -1.728156 | -2.795614 | O  | -1.829804 | 0.920466  | 2.614721  |
| C  | -0.134080 | -2.060049 | -3.910826 | C  | -1.373939 | 1.081800  | 3.992670  |
| C  | 0.308643  | -3.471367 | -4.311924 | C  | -2.465521 | 0.384035  | 4.810339  |

|                           |           |                |           |                           |           |                |           |
|---------------------------|-----------|----------------|-----------|---------------------------|-----------|----------------|-----------|
| H                         | -0.301415 | -3.845987      | -5.141541 | H                         | -2.236607 | 0.434672       | 5.880687  |
| H                         | 1.359002  | -3.474351      | -4.621124 | H                         | -3.437954 | 0.855714       | 4.636781  |
| H                         | 0.199686  | -4.162296      | -3.468112 | H                         | -2.543275 | -0.670759      | 4.523958  |
| C                         | 0.090465  | -1.080529      | -5.072550 | C                         | -1.311218 | 2.575729       | 4.345297  |
| H                         | -0.508046 | -1.382916      | -5.939467 | H                         | -1.048995 | 2.703452       | 5.401773  |
| H                         | -0.207615 | -0.065430      | -4.792933 | H                         | -0.552418 | 3.088418       | 3.745577  |
| H                         | 1.144264  | -1.065523      | -5.369445 | H                         | -2.278970 | 3.056341       | 4.169634  |
| C                         | -1.609877 | -2.059093      | -3.486626 | C                         | -0.010878 | 0.419115       | 4.236289  |
| H                         | -2.241925 | -2.366272      | -4.329344 | H                         | 0.254616  | 0.499156       | 5.297741  |
| H                         | -1.780374 | -2.763007      | -2.665577 | H                         | -0.042891 | -0.643032      | 3.977620  |
| H                         | -1.912150 | -1.065152      | -3.154406 | H                         | 0.766667  | 0.892457       | 3.635749  |
| Si                        | -0.848208 | 0.549651       | 2.687304  | Si                        | 1.416711  | -1.491143      | -2.074524 |
| C                         | -0.571748 | 2.349340       | 3.259683  | C                         | 1.911537  | -0.473991      | -3.613938 |
| H                         | 0.374289  | 2.737858       | 2.868375  | H                         | 1.116495  | 0.220431       | -3.905792 |
| H                         | -1.384610 | 2.997033       | 2.912591  | H                         | 2.822957  | 0.102741       | -3.422673 |
| H                         | -0.538753 | 2.422716       | 4.353991  | H                         | 2.112012  | -1.129626      | -4.470700 |
| C                         | -2.487018 | -0.029293      | 3.474808  | C                         | 2.853987  | -2.706187      | -1.760807 |
| H                         | -2.446592 | 0.033729       | 4.569956  | H                         | 3.005165  | -3.360293      | -2.629154 |
| H                         | -3.315502 | 0.603137       | 3.135569  | H                         | 3.788555  | -2.161009      | -1.587253 |
| H                         | -2.732446 | -1.062308      | 3.206339  | H                         | 2.676919  | -3.343995      | -0.888880 |
| O                         | 0.431563  | -0.386289      | 3.356923  | O                         | 0.029455  | -2.404480      | -2.502787 |
| C                         | 0.642413  | -0.474815      | 4.759965  | C                         | 0.015613  | -3.299732      | -3.606101 |
| H                         | 0.484642  | 0.499987       | 5.247915  | H                         | 0.515269  | -2.857254      | -4.482368 |
| H                         | -0.077932 | -1.178911      | 5.206375  | H                         | 0.562890  | -4.222498      | -3.353946 |
| C                         | 2.066097  | -0.946091      | 5.027627  | C                         | -1.427613 | -3.630893      | -3.963589 |
| H                         | 2.249449  | -1.030474      | 6.105859  | H                         | -1.466411 | -4.327827      | -4.809853 |
| H                         | 2.240711  | -1.926287      | 4.570609  | H                         | -1.939241 | -4.091387      | -3.111803 |
| H                         | 2.787827  | -0.240306      | 4.603390  | H                         | -1.971899 | -2.719804      | -4.232597 |
| H                         | 5.757950  | 3.194382       | 0.688207  | H                         | -6.049444 | 2.591903       | -2.828185 |
| C                         | 5.495837  | 2.160744       | 0.477200  | C                         | -5.521298 | 1.806032       | -2.294178 |
| C                         | 6.504767  | 1.205499       | 0.308480  | C                         | -6.199367 | 0.651754       | -1.895342 |
| C                         | 4.157476  | 1.790779       | 0.382735  | C                         | -4.162728 | 1.948945       | -2.011869 |
| C                         | 6.166199  | -0.123945      | 0.045703  | C                         | -5.508265 | -0.358650      | -1.218551 |
| H                         | 7.549060  | 1.496446       | 0.385519  | H                         | -7.257809 | 0.537424       | -2.114328 |
| C                         | 3.807677  | 0.457465       | 0.110952  | C                         | -3.463327 | 0.942446       | -1.329649 |
| H                         | 3.364775  | 2.517878       | 0.526415  | H                         | -3.633387 | 2.845764       | -2.328338 |
| C                         | 4.825495  | -0.495318      | -0.052321 | C                         | -4.150663 | -0.217102      | -0.941301 |
| H                         | 6.945764  | -0.870546      | -0.080686 | H                         | -6.030945 | -1.261592      | -0.912592 |
| H                         | 4.559610  | -1.530621      | -0.252824 | H                         | -3.598664 | -1.001102      | -0.434427 |
| C                         | 2.390596  | 0.044248       | 0.051792  | C                         | -2.006602 | 1.087319       | -1.075638 |
| H                         | 2.219105  | -1.035872      | -0.025268 | H                         | -1.549522 | 1.949421       | -1.580569 |
| O                         | 1.469198  | 0.812011       | 0.429405  | O                         | -1.294953 | 0.060252       | -0.853321 |
| Total SCF energy          |           | -2078.05965064 |           | Total SCF energy          |           | -2078.04984662 |           |
| Gibbs free energy at 298K |           | -2077.30801200 |           | Gibbs free energy at 298K |           | -2077.29882700 |           |

Imaginary frequency -48.481  
Free energy in solution -2078.02247800

Imaginary frequency -177.263  
Free energy in solution -2078.01354000

**15TS-E-Re-Re**

Cartesian coordinates

| ATOM | X         | Y         | Z         |
|------|-----------|-----------|-----------|
| C    | 2.79572   | -2.027401 | 0.409828  |
| C    | 2.331695  | -0.919593 | -0.31168  |
| C    | 2.917261  | -0.596705 | -1.543729 |
| C    | 3.997094  | -1.341796 | -2.031784 |
| C    | 4.484712  | -2.414869 | -1.273021 |
| C    | 3.884039  | -2.774704 | -0.059842 |
| H    | 4.444529  | -1.101874 | -2.992512 |
| H    | 5.327311  | -2.990831 | -1.643284 |
| H    | 4.249909  | -3.630253 | 0.501308  |
| C    | 1.972117  | -2.245918 | 1.585777  |
| O    | 2.239136  | -3.202352 | 2.48675   |
| C    | 0.365138  | -1.863872 | 3.120976  |
| C    | 1.176184  | -3.138714 | 3.479673  |
| H    | 0.593125  | -4.059656 | 3.394464  |
| N    | 0.941441  | -1.4819   | 1.81221   |
| H    | 0.603385  | -1.062335 | 3.828784  |
| H    | 1.647019  | -3.098033 | 4.463479  |
| Rh   | 0.71223   | -0.007389 | 0.250492  |
| C    | 2.173047  | 0.475216  | -2.183291 |
| O    | 2.418359  | 0.890902  | -3.433564 |
| C    | 0.559259  | 2.031247  | -2.456808 |
| C    | 1.302921  | 1.759793  | -3.792929 |
| H    | 1.718491  | 2.65064   | -4.265733 |
| N    | 1.173675  | 1.028542  | -1.558575 |
| H    | -0.498557 | 1.780073  | -2.564466 |
| H    | 0.690074  | 1.215073  | -4.516887 |
| C    | -1.166787 | -2.029134 | 3.125703  |
| H    | -1.558783 | -1.048027 | 2.832016  |
| C    | -1.663508 | -2.319768 | 4.551445  |
| H    | -1.324458 | -3.300769 | 4.910506  |
| H    | -1.316504 | -1.561751 | 5.26448   |
| H    | -2.758528 | -2.327281 | 4.580024  |
| C    | -1.678668 | -3.065483 | 2.1192    |
| H    | -1.332757 | -2.840195 | 1.107198  |
| H    | -1.356544 | -4.083283 | 2.37621   |
| H    | -2.774909 | -3.071988 | 2.110359  |
| C    | 0.65211   | 3.477742  | -1.92168  |
| H    | 0.272157  | 3.435005  | -0.895713 |

**15TS-Z-Re-Si**

Cartesian coordinates

| ATOM | X         | Y         | Z         |
|------|-----------|-----------|-----------|
| C    | -3.580663 | 0.501655  | -0.192685 |
| C    | -2.552717 | -0.389640 | 0.148975  |
| C    | -2.831916 | -1.759123 | 0.260890  |
| C    | -4.134184 | -2.236366 | 0.072850  |
| C    | -5.158037 | -1.327139 | -0.226147 |
| C    | -4.891440 | 0.040900  | -0.369667 |
| H    | -4.349443 | -3.298679 | 0.149538  |
| H    | -6.171407 | -1.691252 | -0.365279 |
| H    | -5.690319 | 0.731478  | -0.626076 |
| C    | -3.049861 | 1.845153  | -0.332170 |
| O    | -3.825730 | 2.912607  | -0.567419 |
| C    | -1.513739 | 3.498399  | -0.357581 |
| C    | -2.948976 | 4.074490  | -0.529693 |
| H    | -3.092983 | 4.623335  | -1.462397 |
| N    | -1.771442 | 2.053404  | -0.194681 |
| H    | -1.067670 | 3.870189  | 0.570688  |
| H    | -3.268269 | 4.698776  | 0.308999  |
| Rh   | -0.717304 | 0.238189  | 0.262675  |
| C    | -1.607273 | -2.500070 | 0.506094  |
| O    | -1.564901 | -3.839681 | 0.522802  |
| C    | 0.604794  | -2.860734 | 0.783997  |
| C    | -0.161117 | -4.208798 | 0.661704  |
| H    | -0.080107 | -4.848332 | 1.542623  |
| N    | -0.482601 | -1.863956 | 0.662263  |
| H    | 1.242781  | -2.729853 | -0.094451 |
| H    | 0.114809  | -4.779738 | -0.227620 |
| C    | -0.542416 | 3.825543  | -1.511872 |
| H    | 0.401706  | 3.342263  | -1.236239 |
| C    | -0.289913 | 5.340603  | -1.580195 |
| H    | -1.187344 | 5.894238  | -1.886454 |
| H    | 0.038490  | 5.742882  | -0.613312 |
| H    | 0.491145  | 5.562273  | -2.315482 |
| C    | -0.995592 | 3.252270  | -2.861411 |
| H    | -1.008401 | 2.158963  | -2.834667 |
| H    | -1.992224 | 3.614495  | -3.148208 |
| H    | -0.302407 | 3.560611  | -3.652151 |
| C    | 1.466157  | -2.703573 | 2.057485  |
| H    | 1.755260  | -1.646712 | 2.091350  |

|    |           |           |           |    |           |           |           |
|----|-----------|-----------|-----------|----|-----------|-----------|-----------|
| C  | -0.256167 | 4.400499  | -2.749854 | C  | 2.740170  | -3.555394 | 1.932622  |
| H  | -0.241791 | 5.419217  | -2.346144 | H  | 3.390925  | -3.407036 | 2.801526  |
| H  | 0.069877  | 4.46301   | -3.797379 | H  | 2.505632  | -4.627489 | 1.881834  |
| H  | -1.29633  | 4.053158  | -2.743005 | H  | 3.315240  | -3.298132 | 1.034725  |
| C  | 2.086232  | 4.018916  | -1.856085 | C  | 0.723733  | -3.010029 | 3.364480  |
| H  | 2.737884  | 3.357295  | -1.278998 | H  | -0.206800 | -2.444360 | 3.440602  |
| H  | 2.526516  | 4.157495  | -2.852046 | H  | 0.497578  | -4.079062 | 3.470649  |
| H  | 2.094216  | 4.997023  | -1.362407 | H  | 1.343508  | -2.722600 | 4.219794  |
| C  | -2.429282 | -0.234145 | -1.681039 | C  | 2.140761  | 0.021280  | -2.558650 |
| H  | -1.85972  | 0.683338  | -1.66856  | H  | 2.958269  | -0.627999 | -2.858452 |
| C  | -1.693899 | -1.409202 | -1.470672 | C  | 0.905111  | -0.605891 | -2.358737 |
| O  | -0.51523  | -1.514718 | -1.007165 | O  | -0.195275 | -0.050884 | -2.091906 |
| O  | -2.401945 | -2.575285 | -1.71068  | O  | 0.976626  | -2.012294 | -2.362945 |
| C  | -1.766308 | -3.730093 | -2.331311 | C  | 0.269969  | -2.723343 | -3.424331 |
| C  | -2.961353 | -4.576236 | -2.787574 | C  | 0.955236  | -4.093095 | -3.470191 |
| H  | -2.618902 | -5.505308 | -3.257084 | H  | 0.470163  | -4.744322 | -4.206194 |
| H  | -3.593651 | -4.833467 | -1.931014 | H  | 2.011946  | -3.988194 | -3.737735 |
| H  | -3.571716 | -4.023577 | -3.509289 | H  | 0.898392  | -4.583618 | -2.491630 |
| C  | -0.916865 | -4.516345 | -1.322486 | C  | 0.440224  | -2.001368 | -4.769387 |
| H  | -0.543034 | -5.438011 | -1.785884 | H  | 0.002902  | -2.604756 | -5.572893 |
| H  | -0.070338 | -3.917727 | -0.982953 | H  | -0.062472 | -1.029273 | -4.763075 |
| H  | -1.522275 | -4.795269 | -0.453289 | H  | 1.499685  | -1.841966 | -4.994973 |
| C  | -0.926563 | -3.294438 | -3.540262 | C  | -1.218760 | -2.867696 | -3.076542 |
| H  | -0.544751 | -4.175526 | -4.06888  | H  | -1.750560 | -3.387559 | -3.883205 |
| H  | -1.537761 | -2.713026 | -4.239715 | H  | -1.350282 | -3.448911 | -2.157870 |
| H  | -0.07586  | -2.685534 | -3.22394  | H  | -1.668282 | -1.883794 | -2.928711 |
| Si | 1.96201   | 1.579341  | 1.552228  | Si | -1.018046 | 0.653128  | 2.619665  |
| C  | 1.91107   | 1.264712  | 3.436653  | C  | -1.474922 | 2.463390  | 3.023656  |
| H  | 0.8833    | 1.226581  | 3.812663  | H  | -0.737244 | 3.185048  | 2.659159  |
| H  | 2.411505  | 0.322987  | 3.688474  | H  | -2.448481 | 2.723575  | 2.593970  |
| H  | 2.433584  | 2.062037  | 3.979996  | H  | -1.548806 | 2.584330  | 4.112223  |
| C  | 3.820556  | 1.709956  | 1.126754  | C  | -2.341806 | -0.412816 | 3.470858  |
| H  | 4.295636  | 2.527454  | 1.684436  | H  | -2.257961 | -0.297989 | 4.558158  |
| H  | 4.334324  | 0.780393  | 1.398581  | H  | -3.343731 | -0.088331 | 3.167588  |
| H  | 4.000084  | 1.882399  | 0.060929  | H  | -2.255205 | -1.476802 | 3.234853  |
| O  | 1.237023  | 3.118437  | 1.298136  | O  | 0.409571  | 0.293549  | 3.492801  |
| C  | 1.710063  | 4.292676  | 1.942714  | C  | 1.511073  | 1.191442  | 3.593126  |
| H  | 1.907538  | 4.107384  | 3.010184  | H  | 1.938430  | 1.383172  | 2.600381  |
| H  | 2.661277  | 4.618176  | 1.491219  | H  | 1.177742  | 2.158648  | 4.000966  |
| C  | 0.666421  | 5.394213  | 1.808053  | C  | 2.560306  | 0.586640  | 4.516168  |
| H  | 1.011395  | 6.315972  | 2.292448  | H  | 3.415629  | 1.264913  | 4.620634  |
| H  | 0.469057  | 5.611454  | 0.75268   | H  | 2.137722  | 0.401296  | 5.509668  |
| H  | -0.275241 | 5.085025  | 2.273804  | H  | 2.924338  | -0.366146 | 4.116628  |
| H  | -4.403476 | 0.591606  | -1.982777 | H  | 3.270260  | 1.839300  | -2.774982 |



|                           |           |                |           |                           |          |                |           |
|---------------------------|-----------|----------------|-----------|---------------------------|----------|----------------|-----------|
| C                         | -3.762304 | -0.20645       | -2.379143 | C                         | 2.242630 | 1.479905       | -2.891765 |
| H                         | -4.291911 | -1.155347      | -2.260902 | H                         | 1.603689 | 2.063750       | -2.226770 |
| H                         | -3.666405 | -0.023471      | -3.462383 | H                         | 1.934940 | 1.694202       | -3.926985 |
| C                         | -3.591674 | 1.234779       | 0.687284  | C                         | 3.733091 | 0.793009       | -0.169303 |
| C                         | -4.84058  | 0.603134       | 0.798819  | C                         | 3.978506 | 2.160220       | 0.032935  |
| C                         | -3.533345 | 2.638195       | 0.664821  | C                         | 4.822876 | -0.080395      | -0.316618 |
| C                         | -6.009243 | 1.357388       | 0.885783  | C                         | 5.286459 | 2.641658       | 0.080274  |
| H                         | -4.888737 | -0.483512      | 0.809597  | H                         | 3.132485 | 2.827460       | 0.161106  |
| C                         | -4.703012 | 3.38993        | 0.748685  | C                         | 6.128412 | 0.401105       | -0.269363 |
| H                         | -2.560639 | 3.115147       | 0.596291  | H                         | 4.637555 | -1.140596      | -0.476884 |
| C                         | -5.943783 | 2.753608       | 0.860233  | C                         | 6.364536 | 1.765869       | -0.071123 |
| H                         | -6.970988 | 0.858405       | 0.972223  | H                         | 5.466437 | 3.701986       | 0.238776  |
| H                         | -4.65016  | 4.475729       | 0.733986  | H                         | 6.963697 | -0.284725      | -0.384608 |
| H                         | -6.854691 | 3.342639       | 0.928582  | H                         | 7.383338 | 2.142324       | -0.032407 |
| C                         | -2.351308 | 0.4329         | 0.641556  | C                         | 2.351125 | 0.261503       | -0.170209 |
| H                         | -2.4648   | -0.631133      | 0.872624  | H                         | 2.281996 | -0.827715      | -0.069217 |
| O                         | -1.220871 | 0.987698       | 0.713315  | O                         | 1.368747 | 0.994282       | 0.144529  |
| Total SCF energy          |           | -2078.05234929 |           | Total SCF energy          |          | -2078.05816613 |           |
| Gibbs free energy at 298K |           | -2077.30133900 |           | Gibbs free energy at 298K |          | -2077.30489400 |           |
| Imaginary frequency       |           | -111.037       |           | Imaginary frequency       |          | -124.448       |           |
| Free energy in solution   |           | -2078.01616500 |           | Free energy in solution   |          | -2078.02168600 |           |

**15TS-Z-Re-Re**

Cartesian coordinates

| ATOM | X        | Y         | Z         |
|------|----------|-----------|-----------|
| C    | 3.590017 | -0.007099 | 0.557826  |
| C    | 2.414794 | -0.768530 | 0.547787  |
| C    | 2.385274 | -2.011461 | 1.200232  |
| C    | 3.529311 | -2.503790 | 1.837636  |
| C    | 4.708652 | -1.745553 | 1.806308  |
| C    | 4.749326 | -0.495927 | 1.175239  |
| H    | 3.505037 | -3.458024 | 2.356943  |
| H    | 5.601392 | -2.127439 | 2.292159  |
| H    | 5.664776 | 0.089535  | 1.175199  |
| C    | 3.369054 | 1.260689  | -0.112214 |
| O    | 4.358773 | 2.139345  | -0.335574 |
| C    | 2.261425 | 2.931660  | -1.135102 |
| C    | 3.792970 | 3.168492  | -1.194549 |
| H    | 4.112429 | 4.135808  | -0.804896 |
| N    | 2.181191 | 1.574924  | -0.547555 |
| H    | 1.841111 | 2.900111  | -2.144705 |
| H    | 4.209298 | 3.025106  | -2.196568 |
| Rh   | 0.766684 | -0.055106 | -0.199500 |
| C    | 1.043693 | -2.569328 | 1.143154  |

**14TS-Z-Si-Re**

Cartesian coordinates

| ATOM | X         | Y         | Z         |
|------|-----------|-----------|-----------|
| C    | -0.806869 | -3.279989 | -0.786244 |
| C    | -1.292899 | -2.225026 | 0.002334  |
| C    | -2.296864 | -2.473915 | 0.949962  |
| C    | -2.821824 | -3.760895 | 1.108589  |
| C    | -2.347898 | -4.797024 | 0.291082  |
| C    | -1.343597 | -4.568042 | -0.657581 |
| H    | -3.584735 | -3.958402 | 1.856793  |
| H    | -2.75937  | -5.795573 | 0.40254   |
| H    | -0.979275 | -5.382199 | -1.278315 |
| C    | 0.245732  | -2.805268 | -1.663963 |
| O    | 0.777868  | -3.547591 | -2.650962 |
| C    | 1.801038  | -1.418262 | -2.50838  |
| C    | 1.555311  | -2.612001 | -3.457053 |
| H    | 2.456878  | -3.126746 | -3.788525 |
| N    | 0.6887    | -1.583834 | -1.542298 |
| H    | 1.668815  | -0.46941  | -3.035197 |
| H    | 0.945214  | -2.345363 | -4.326568 |
| Rh   | -0.524559 | -0.445552 | -0.146844 |
| C    | -2.578313 | -1.256826 | 1.692791  |

|   |           |           |           |   |           |           |           |
|---|-----------|-----------|-----------|---|-----------|-----------|-----------|
| O | 0.671663  | -3.673011 | 1.805518  | O | -3.328404 | -1.227858 | 2.802623  |
| C | -1.162111 | -2.656197 | 0.636706  | C | -2.366635 | 0.905901  | 2.304404  |
| C | -0.778778 | -3.770302 | 1.651988  | C | -3.118761 | 0.090745  | 3.392959  |
| H | -1.001478 | -4.781659 | 1.308769  | H | -4.098377 | 0.491402  | 3.657596  |
| N | 0.122825  | -1.945454 | 0.468977  | N | -2.021954 | -0.14086  | 1.322539  |
| H | -1.857237 | -1.945807 | 1.091032  | H | -1.427622 | 1.291292  | 2.706215  |
| H | -1.215440 | -3.619456 | 2.641673  | H | -2.526516 | -0.054042 | 4.300687  |
| C | 1.484749  | 3.990258  | -0.321069 | C | 3.195319  | -1.426246 | -1.826618 |
| H | 0.445624  | 3.644703  | -0.305921 | H | 3.116784  | -0.784734 | -0.942401 |
| C | 1.511976  | 5.346796  | -1.043939 | C | 4.2464    | -0.828577 | -2.775373 |
| H | 2.521233  | 5.777692  | -1.073468 | H | 4.347169  | -1.42235  | -3.694271 |
| H | 1.153281  | 5.262833  | -2.077464 | H | 3.989592  | 0.196935  | -3.067578 |
| H | 0.869643  | 6.066937  | -0.525500 | H | 5.230528  | -0.804006 | -2.294677 |
| C | 1.961206  | 4.100519  | 1.134068  | C | 3.630598  | -2.810785 | -1.324114 |
| H | 1.794503  | 3.160268  | 1.667573  | H | 2.873028  | -3.26676  | -0.680337 |
| H | 3.024281  | 4.365887  | 1.202473  | H | 3.847163  | -3.504925 | -2.145419 |
| H | 1.401327  | 4.884593  | 1.656222  | H | 4.547302  | -2.715544 | -0.733594 |
| C | -1.768263 | -3.161260 | -0.691461 | C | -3.159571 | 2.079247  | 1.686698  |
| H | -1.778397 | -2.291955 | -1.356756 | H | -2.57284  | 2.404819  | 0.820924  |
| C | -3.214740 | -3.627283 | -0.459098 | C | -3.250577 | 3.241179  | 2.688394  |
| H | -3.682490 | -3.920831 | -1.405838 | H | -3.758365 | 4.100857  | 2.236365  |
| H | -3.261971 | -4.498977 | 0.208688  | H | -3.82127  | 2.964344  | 3.585798  |
| H | -3.827415 | -2.834183 | -0.013769 | H | -2.256718 | 3.571865  | 3.012093  |
| C | -0.938808 | -4.256535 | -1.375121 | C | -4.546848 | 1.672563  | 1.171778  |
| H | 0.101807  | -3.948152 | -1.506510 | H | -4.479237 | 0.83916   | 0.46695   |
| H | -0.953346 | -5.202027 | -0.816942 | H | -5.227826 | 1.388653  | 1.985007  |
| H | -1.344263 | -4.466437 | -2.370865 | H | -5.011601 | 2.512013  | 0.64277   |
| C | -2.127140 | 2.076845  | 1.654466  | C | 2.124961  | 1.572686  | 2.042514  |
| H | -3.157855 | 1.850344  | 1.912452  | H | 3.152925  | 1.908808  | 2.130051  |
| C | -1.195216 | 1.097787  | 2.048227  | C | 1.932143  | 0.202977  | 1.880769  |
| O | 0.045674  | 1.109129  | 1.850501  | C | 1.035336  | 2.495829  | 2.503986  |
| O | -1.781115 | -0.056671 | 2.591329  | H | 0.665521  | 2.233756  | 3.508328  |
| C | -1.604893 | -0.288924 | 4.020479  | H | 1.395782  | 3.529278  | 2.549392  |
| C | -2.690212 | -1.312790 | 4.368468  | H | 0.172929  | 2.473978  | 1.824917  |
| H | -2.632307 | -1.592784 | 5.426299  | O | 0.825571  | -0.412739 | 1.827674  |
| H | -3.684556 | -0.900559 | 4.168533  | O | 3.119261  | -0.523187 | 1.683034  |
| H | -2.573486 | -2.221191 | 3.767986  | C | 3.486051  | -1.499798 | 2.701674  |
| C | -1.834992 | 1.003966  | 4.819441  | C | 4.971781  | -1.766205 | 2.437382  |
| H | -1.796908 | 0.786859  | 5.893035  | H | 5.360933  | -2.515088 | 3.136563  |
| H | -1.066985 | 1.752374  | 4.599812  | H | 5.120016  | -2.138396 | 1.418571  |
| H | -2.813971 | 1.435838  | 4.588661  | H | 5.552426  | -0.844823 | 2.552682  |
| C | -0.203593 | -0.849626 | 4.306016  | C | 2.663489  | -2.787713 | 2.548476  |
| H | -0.082068 | -1.042796 | 5.379109  | H | 2.983317  | -3.534246 | 3.286574  |
| H | -0.042636 | -1.791572 | 3.772053  | H | 1.600743  | -2.579171 | 2.684293  |

|                           |           |                |           |                           |           |                |           |
|---------------------------|-----------|----------------|-----------|---------------------------|-----------|----------------|-----------|
| H                         | 0.563831  | -0.143250      | 3.982283  | H                         | 2.802729  | -3.212977      | 1.549997  |
| Si                        | 1.307095  | -0.936805      | -2.364377 | C                         | 3.302076  | -0.908494      | 4.108     |
| C                         | 1.950604  | 0.408504       | -3.557757 | H                         | 3.682164  | -1.60985       | 4.859693  |
| H                         | 1.231707  | 1.228178       | -3.659769 | H                         | 3.848297  | 0.035112       | 4.207747  |
| H                         | 2.902066  | 0.820811       | -3.205781 | H                         | 2.245718  | -0.720483      | 4.323877  |
| H                         | 2.125326  | -0.007150      | -4.558004 | Si                        | -2.003181 | 0.115257       | -1.947881 |
| C                         | 2.612341  | -2.327312      | -2.388129 | C                         | -1.059204 | 0.370227       | -3.586995 |
| H                         | 2.729218  | -2.733890      | -3.400994 | H                         | -0.19737  | 1.028411       | -3.437948 |
| H                         | 3.587294  | -1.942082      | -2.068714 | H                         | -0.708184 | -0.580841      | -4.001473 |
| H                         | 2.351192  | -3.155624      | -1.722109 | H                         | -1.705942 | 0.83456        | -4.342214 |
| O                         | -0.147011 | -1.542148      | -3.039110 | C                         | -3.424439 | -1.104918      | -2.30264  |
| C                         | -0.226174 | -2.038457      | -4.368715 | H                         | -4.072461 | -0.730265      | -3.105307 |
| H                         | 0.307738  | -1.378250      | -5.069835 | H                         | -3.033112 | -2.079204      | -2.615994 |
| H                         | 0.249223  | -3.030649      | -4.432911 | H                         | -4.046651 | -1.27          | -1.416803 |
| C                         | -1.689374 | -2.132838      | -4.780964 | O                         | -2.697785 | 1.636421       | -1.556943 |
| H                         | -1.778219 | -2.515140      | -5.805287 | C                         | -3.670633 | 2.255495       | -2.388175 |
| H                         | -2.236031 | -2.805578      | -4.111744 | H                         | -3.496573 | 2.02528        | -3.45144  |
| H                         | -2.162870 | -1.146983      | -4.730664 | H                         | -4.673061 | 1.874006       | -2.138001 |
| H                         | -2.282479 | 4.087380       | 0.830431  | C                         | -3.621255 | 3.764817       | -2.186461 |
| C                         | -1.766108 | 3.538914       | 1.630766  | H                         | -4.380841 | 4.263178       | -2.80138  |
| H                         | -0.690466 | 3.672662       | 1.504853  | H                         | -3.80536  | 4.01813        | -1.13689  |
| H                         | -2.047802 | 4.033320       | 2.573054  | H                         | -2.63584  | 4.15482        | -2.462433 |
| C                         | -3.366569 | 1.649075       | -0.929342 | H                         | 5.005182  | 4.901892       | -0.987655 |
| C                         | -3.971043 | 2.883798       | -1.211488 | C                         | 3.936876  | 4.735258       | -0.877124 |
| C                         | -4.138661 | 0.480077       | -1.020091 | C                         | 3.05116   | 5.818017       | -0.911939 |
| C                         | -5.323085 | 2.952892       | -1.549020 | C                         | 3.449366  | 3.44355        | -0.699472 |
| H                         | -3.374911 | 3.792384       | -1.179232 | C                         | 1.677591  | 5.599638       | -0.772418 |
| C                         | -5.487729 | 0.549488       | -1.355997 | H                         | 3.431184  | 6.826746       | -1.051139 |
| H                         | -3.658829 | -0.473608      | -0.828224 | C                         | 2.07096   | 3.217424       | -0.552058 |
| C                         | -6.087390 | 1.786350       | -1.618038 | H                         | 4.134815  | 2.599633       | -0.659793 |
| H                         | -5.777416 | 3.916253       | -1.766403 | C                         | 1.186329  | 4.307071       | -0.596577 |
| H                         | -6.076190 | -0.362562      | -1.419751 | H                         | 0.988627  | 6.439769       | -0.806536 |
| H                         | -7.140230 | 1.837900       | -1.883080 | H                         | 0.121977  | 4.116565       | -0.504746 |
| C                         | -1.920053 | 1.574380       | -0.590540 | C                         | 1.558415  | 1.841018       | -0.403141 |
| H                         | -1.381254 | 2.531020       | -0.630564 | H                         | 2.283136  | 1.039606       | -0.582588 |
| O                         | -1.281085 | 0.498962       | -0.787069 | O                         | 0.326269  | 1.598417       | -0.382097 |
| Total SCF energy          |           | -2078.04508245 |           | Total SCF energy          |           | -2078.04840432 |           |
| Gibbs free energy at 298K |           | -2077.29212100 |           | Gibbs free energy at 298K |           | -2077.29551500 |           |
| Imaginary frequency       |           | -170.010       |           | Imaginary frequency       |           | -24.700        |           |
| Free energy in solution   |           | -2078.00874800 |           | Free energy in solution   |           | -2078.01178000 |           |

14b-Si-Si

Cartesian coordinates

| ATOM | X         | Y         | Z         |
|------|-----------|-----------|-----------|
| C    | 2.608099  | -0.005770 | 0.518339  |
| C    | 2.996737  | 1.169359  | 1.181847  |
| C    | 4.347763  | 1.530252  | 1.259327  |
| C    | 5.308980  | 0.704929  | 0.658682  |
| C    | 4.937603  | -0.449556 | -0.045938 |
| C    | 3.582270  | -0.792906 | -0.121646 |
| H    | 4.651191  | 2.441451  | 1.768297  |
| H    | 6.358623  | 0.975797  | 0.721976  |
| H    | 5.693629  | -1.058357 | -0.535138 |
| Rh   | 0.712572  | -0.409800 | 0.261445  |
| Si   | 0.714222  | -1.763580 | 2.237291  |
| C    | -2.200693 | 0.133225  | -0.657335 |
| C    | -1.945464 | 0.718094  | -2.129831 |
| C    | -0.663442 | 1.535769  | -2.137486 |
| H    | -1.723766 | -0.175330 | -2.726325 |
| O    | 0.438064  | 1.114475  | -1.798719 |
| O    | -0.861746 | 2.800036  | -2.559554 |
| C    | 0.236702  | 3.758093  | -2.780049 |
| C    | 1.819550  | 1.896372  | 1.629980  |
| O    | 1.888536  | 3.109102  | 2.200866  |
| C    | -0.371371 | 2.389182  | 1.878625  |
| C    | 0.516312  | 3.569147  | 2.368840  |
| H    | 0.380192  | 3.815381  | 3.423452  |
| C    | 2.936127  | -1.871237 | -0.853813 |
| O    | 3.603164  | -2.800518 | -1.554839 |
| C    | 1.227602  | -3.102748 | -1.678381 |
| C    | 2.598605  | -3.711753 | -2.092651 |
| H    | 2.750796  | -3.764658 | -3.172810 |
| N    | 0.629951  | 1.403491  | 1.423513  |
| N    | 1.635914  | -1.955772 | -0.850797 |
| H    | 0.401768  | 4.475650  | 1.769644  |
| H    | -0.949297 | 2.696136  | 0.998228  |
| H    | 2.783883  | -4.695586 | -1.654174 |
| H    | 0.681109  | -3.804671 | -1.039817 |
| C    | 0.283193  | -2.699591 | -2.832119 |
| H    | -0.550502 | -2.193757 | -2.329812 |
| C    | 0.913733  | -1.711221 | -3.822011 |
| H    | 0.175530  | -1.417256 | -4.577717 |
| H    | 1.248779  | -0.803282 | -3.312838 |
| H    | 1.764558  | -2.147968 | -4.362013 |
| C    | -0.251527 | -3.952060 | -3.543352 |

14b-Si-Re

Cartesian coordinates

| ATOM | X         | Y         | Z         |
|------|-----------|-----------|-----------|
| C    | 2.580164  | -0.137528 | -0.342771 |
| C    | 3.350499  | -0.786185 | 0.639218  |
| C    | 4.741043  | -0.633116 | 0.671173  |
| C    | 5.360769  | 0.168875  | -0.298918 |
| C    | 4.610133  | 0.836447  | -1.276178 |
| C    | 3.216364  | 0.689579  | -1.280966 |
| H    | 5.337077  | -1.123631 | 1.436432  |
| H    | 6.440530  | 0.283152  | -0.285458 |
| H    | 5.105378  | 1.465399  | -2.011468 |
| Rh   | 0.628005  | -0.306175 | -0.297139 |
| Si   | 0.791392  | -2.125315 | -1.852345 |
| O    | -1.485467 | -0.543647 | 0.017536  |
| C    | -2.268783 | 0.583437  | 0.042976  |
| C    | -2.251411 | 1.312045  | 1.439226  |
| H    | -1.929846 | 1.348291  | -0.684488 |
| C    | -0.891109 | 1.908326  | 1.774224  |
| H    | -2.949934 | 2.158615  | 1.409969  |
| O    | 0.191047  | 1.588384  | 1.298702  |
| O    | -1.025458 | 2.862871  | 2.714934  |
| C    | 0.122303  | 3.531430  | 3.357981  |
| C    | 2.474255  | -1.509111 | 1.548411  |
| O    | 2.896419  | -2.100488 | 2.675388  |
| C    | 0.510409  | -2.202900 | 2.435793  |
| C    | 1.702062  | -2.582416 | 3.363417  |
| H    | 1.821308  | -3.657882 | 3.508426  |
| C    | 2.226111  | 1.309821  | -2.143920 |
| O    | 2.559141  | 2.058875  | -3.210538 |
| C    | 0.214894  | 1.981787  | -2.884291 |
| C    | 1.312520  | 2.295771  | -3.926888 |
| H    | 1.324102  | 3.327873  | -4.279062 |
| N    | 1.193620  | -1.540936 | 1.309972  |
| N    | 0.952422  | 1.140933  | -1.914151 |
| H    | 1.669012  | -2.089023 | 4.337737  |
| H    | -0.117157 | -1.446677 | 2.920146  |
| H    | 1.291368  | 1.616448  | -4.784948 |
| H    | -0.589223 | 1.386732  | -3.327264 |
| C    | -0.409779 | 3.241433  | -2.230537 |
| H    | -1.010692 | 2.873103  | -1.392240 |
| C    | 0.627401  | 4.217498  | -1.657150 |
| H    | 0.120831  | 5.038626  | -1.137244 |
| H    | 1.282886  | 3.723265  | -0.933932 |

|   |           |           |           |   |           |           |           |
|---|-----------|-----------|-----------|---|-----------|-----------|-----------|
| H | -0.742051 | -4.637562 | -2.841215 | H | 1.252817  | 4.667279  | -2.438351 |
| H | -0.986812 | -3.676145 | -4.307547 | C | -1.356973 | 3.939033  | -3.219558 |
| H | 0.548952  | -4.507828 | -4.050922 | H | -2.138822 | 3.257541  | -3.575618 |
| C | -1.369220 | 1.819708  | 2.911697  | H | -1.849834 | 4.794202  | -2.743626 |
| H | -1.712389 | 0.872198  | 2.481515  | H | -0.820473 | 4.322488  | -4.097555 |
| C | -2.574649 | 2.761416  | 3.059784  | C | -0.413756 | -3.361347 | 2.000500  |
| H | -3.317421 | 2.331815  | 3.740925  | H | -1.037660 | -2.931012 | 1.208872  |
| H | -2.279431 | 3.735645  | 3.474002  | C | -1.318638 | -3.782595 | 3.169636  |
| H | -3.068776 | 2.942598  | 2.097334  | H | -2.019801 | -4.562055 | 2.851086  |
| C | -0.745167 | 1.503854  | 4.276983  | H | -0.736476 | -4.193654 | 4.006449  |
| H | -1.453680 | 0.933989  | 4.885842  | H | -1.908034 | -2.940234 | 3.551480  |
| H | 0.152703  | 0.890360  | 4.176946  | C | 0.333278  | -4.568119 | 1.418640  |
| H | -0.489809 | 2.414070  | 4.835465  | H | -0.380062 | -5.268400 | 0.972993  |
| C | 0.958283  | -3.612056 | 1.840431  | H | 1.021769  | -4.271054 | 0.624784  |
| H | 0.880863  | -4.195435 | 2.766910  | H | 0.893643  | -5.117820 | 2.186635  |
| H | 0.205110  | -3.990347 | 1.142943  | C | 0.579587  | -1.531919 | -3.654212 |
| H | 1.948972  | -3.793885 | 1.410030  | H | 0.528747  | -2.403442 | -4.319453 |
| C | 2.019474  | -1.316401 | 3.542341  | H | -0.334342 | -0.947063 | -3.797291 |
| H | 1.843667  | -1.906661 | 4.449790  | H | 1.433827  | -0.922238 | -3.967152 |
| H | 3.024227  | -1.547659 | 3.171310  | C | 2.412969  | -3.114893 | -1.795416 |
| H | 2.005790  | -0.258820 | 3.819136  | H | 2.333015  | -3.972984 | -2.473594 |
| O | -0.770802 | -1.602718 | 3.057802  | H | 3.259848  | -2.499035 | -2.117159 |
| C | -1.971933 | -2.210281 | 2.567337  | H | 2.640653  | -3.496844 | -0.796095 |
| C | -3.127339 | -1.838043 | 3.484910  | O | -0.396295 | -3.308235 | -1.561842 |
| H | -1.854137 | -3.305544 | 2.555136  | C | -1.761641 | -3.111307 | -1.940374 |
| H | -2.154246 | -1.876069 | 1.539816  | C | -2.578962 | -4.310804 | -1.482924 |
| H | -4.051548 | -2.319581 | 3.144272  | H | -1.833961 | -3.016703 | -3.035708 |
| H | -2.924977 | -2.156419 | 4.513961  | H | -2.133056 | -2.186835 | -1.486884 |
| H | -3.291355 | -0.754978 | 3.487068  | H | -3.625718 | -4.197868 | -1.790279 |
| C | 0.929479  | 4.091328  | -1.455124 | H | -2.186531 | -5.237484 | -1.916854 |
| H | 1.653667  | 4.898840  | -1.612120 | H | -2.549743 | -4.406358 | -0.391660 |
| H | 0.191806  | 4.437976  | -0.722384 | C | 0.985538  | 2.498007  | 4.090594  |
| H | 1.453157  | 3.223117  | -1.053553 | H | 1.764669  | 3.012127  | 4.664736  |
| C | 1.215927  | 3.206768  | -3.822390 | H | 0.374433  | 1.919743  | 4.792683  |
| H | 1.752055  | 2.335927  | -3.442465 | H | 1.466932  | 1.813186  | 3.390016  |
| H | 0.680153  | 2.924269  | -4.735311 | C | 0.925156  | 4.330954  | 2.326898  |
| H | 1.945220  | 3.982023  | -4.083073 | H | 1.437199  | 3.672381  | 1.624286  |
| C | -0.500545 | 4.984552  | -3.326683 | H | 0.264685  | 5.002412  | 1.767541  |
| H | -1.237784 | 5.347290  | -2.602907 | H | 1.672742  | 4.944178  | 2.843140  |
| H | 0.210844  | 5.791581  | -3.532071 | C | -0.561676 | 4.470455  | 4.355827  |
| H | -1.024762 | 4.738423  | -4.255658 | H | -1.176231 | 3.903188  | 5.062232  |
| C | -3.627259 | -0.422588 | -0.557743 | H | 0.189743  | 5.032192  | 4.921043  |
| C | -3.915904 | -1.707031 | -1.040016 | H | -1.208507 | 5.183341  | 3.834146  |
| C | -4.661482 | 0.313451  | 0.031679  | C | -3.735096 | 0.297135  | -0.324773 |

|                           |           |                |           |                           |           |                |           |
|---------------------------|-----------|----------------|-----------|---------------------------|-----------|----------------|-----------|
| C                         | -5.205466 | -2.230804      | -0.951797 | C                         | -4.550839 | 1.301997       | -0.861853 |
| H                         | -3.109739 | -2.297192      | -1.464708 | C                         | -4.292642 | -0.970137      | -0.117074 |
| C                         | -5.954562 | -0.208343      | 0.128675  | C                         | -5.886716 | 1.052372       | -1.183087 |
| H                         | -4.452525 | 1.307211       | 0.423769  | H                         | -4.132951 | 2.292596       | -1.038644 |
| C                         | -6.232178 | -1.482543      | -0.367385 | C                         | -5.628569 | -1.225708      | -0.433948 |
| H                         | -5.410986 | -3.228845      | -1.332252 | H                         | -3.656196 | -1.750048      | 0.286943  |
| H                         | -6.741536 | 0.378891       | 0.596081  | C                         | -6.431721 | -0.215649      | -0.968718 |
| H                         | -7.235931 | -1.893326      | -0.292925 | H                         | -6.499823 | 1.845014       | -1.605953 |
| C                         | -3.139726 | 1.455785       | -2.751029 | H                         | -6.043229 | -2.217011      | -0.265225 |
| H                         | -3.986309 | 0.773881       | -2.858348 | H                         | -7.470258 | -0.415189      | -1.220764 |
| H                         | -3.463840 | 2.298680       | -2.131062 | C                         | -2.689484 | 0.380993       | 2.587166  |
| H                         | -2.889655 | 1.853304       | -3.739337 | H                         | -3.733582 | 0.087429       | 2.446856  |
| O                         | -1.286488 | -0.836181      | -0.342602 | H                         | -2.081451 | -0.526906      | 2.577041  |
| H                         | -2.166789 | 1.016059       | 0.018712  | H                         | -2.596697 | 0.874891       | 3.559462  |
| Total SCF energy          |           | -2078.08838525 |           | Total SCF energy          |           | -2078.08612419 |           |
| Gibbs free energy at 298K |           | -2077.33243000 |           | Gibbs free energy at 298K |           | -2077.32910200 |           |
| Free energy in solution   |           | -2078.05223400 |           | Free energy in solution   |           | -2078.05139000 |           |

**15b-Re-Re**

Cartesian coordinates

| ATOM | X         | Y         | Z         |
|------|-----------|-----------|-----------|
| C    | 2.583500  | -0.501228 | -0.261281 |
| C    | 3.119812  | -1.370168 | 0.710438  |
| C    | 4.504629  | -1.468083 | 0.883963  |
| C    | 5.351105  | -0.694189 | 0.075391  |
| C    | 4.834115  | 0.206221  | -0.866458 |
| C    | 3.444917  | 0.312169  | -1.015917 |
| H    | 4.924122  | -2.125785 | 1.640793  |
| H    | 6.426712  | -0.776532 | 0.198768  |
| H    | 5.504635  | 0.823916  | -1.458171 |
| Rh   | 0.645700  | -0.273195 | -0.358297 |
| Si   | 0.763736  | -1.923461 | -2.101380 |
| O    | -1.321145 | 0.071050  | 0.242134  |
| C    | -2.213939 | 1.111101  | 0.036921  |
| C    | -2.494874 | 1.826151  | 1.402910  |
| H    | -1.819130 | 1.885530  | -0.645199 |
| C    | -1.174508 | 2.268330  | 2.010797  |
| O    | -0.419441 | 3.066450  | 1.484235  |
| O    | -0.975256 | 1.716935  | 3.227701  |
| C    | 0.182143  | 2.077048  | 4.064724  |
| C    | 2.040543  | -1.968388 | 1.483280  |
| O    | 2.224719  | -2.687822 | 2.599780  |
| C    | -0.102196 | -2.271233 | 2.165624  |
| C    | 0.901799  | -2.866324 | 3.196128  |

**15b-Re-Si**

Cartesian coordinates

| ATOM | X         | Y         | Z         |
|------|-----------|-----------|-----------|
| C    | 3.584524  | -0.712434 | 0.166002  |
| C    | 2.513453  | -0.033301 | 0.774076  |
| C    | 2.786277  | 1.048678  | 1.625489  |
| C    | 4.105628  | 1.420700  | 1.912179  |
| C    | 5.158665  | 0.698449  | 1.333993  |
| C    | 4.910031  | -0.360633 | 0.449542  |
| H    | 4.314379  | 2.263384  | 2.566174  |
| H    | 6.183939  | 0.977094  | 1.558218  |
| H    | 5.737174  | -0.889463 | -0.017024 |
| C    | 3.070662  | -1.700522 | -0.767004 |
| O    | 3.851502  | -2.520497 | -1.485503 |
| C    | 1.524194  | -2.843969 | -1.955985 |
| C    | 2.954840  | -3.381811 | -2.247604 |
| H    | 3.247869  | -3.311867 | -3.297225 |
| N    | 1.782830  | -1.808918 | -0.939817 |
| H    | 0.912111  | -3.627744 | -1.499582 |
| H    | 3.110867  | -4.405659 | -1.897741 |
| Rh   | 0.672999  | -0.439899 | 0.234904  |
| C    | 1.547034  | 1.693377  | 2.024606  |
| O    | 1.526523  | 2.823673  | 2.750018  |
| C    | -0.666095 | 2.104215  | 2.146091  |
| C    | 0.145261  | 3.281022  | 2.753320  |
| H    | -0.121395 | 3.522205  | 3.783307  |

|   |           |           |           |    |           |           |           |
|---|-----------|-----------|-----------|----|-----------|-----------|-----------|
| H | 0.768676  | -3.933599 | 3.381289  | N  | 0.399126  | 1.216612  | 1.631134  |
| C | 2.664426  | 1.227068  | -1.830046 | H  | -1.252362 | 2.456305  | 1.290099  |
| O | 3.213768  | 2.059260  | -2.729815 | H  | 0.101754  | 4.190128  | 2.146215  |
| C | 0.868180  | 2.374017  | -2.550359 | C  | 0.746481  | -2.296430 | -3.171576 |
| C | 2.094304  | 2.651420  | -3.452912 | H  | -0.175320 | -1.891170 | -2.738119 |
| H | 2.319381  | 3.708121  | -3.599667 | C  | 0.379531  | -3.439904 | -4.129890 |
| N | 0.806227  | -1.715250 | 1.147938  | H  | 1.268639  | -3.890459 | -4.592167 |
| N | 1.364609  | 1.266078  | -1.703047 | H  | -0.170820 | -4.236997 | -3.615002 |
| H | 0.906312  | -2.332866 | 4.150571  | H  | -0.254492 | -3.070006 | -4.943307 |
| H | -0.652641 | -1.428595 | 2.597026  | C  | 1.479842  | -1.159170 | -3.894463 |
| H | 2.031769  | 2.150646  | -4.424284 | H  | 1.667406  | -0.320622 | -3.217239 |
| H | 0.022800  | 2.011309  | -3.143933 | H  | 2.437141  | -1.486600 | -4.321697 |
| C | 0.399464  | 3.593581  | -1.718945 | H  | 0.871206  | -0.786230 | -4.726172 |
| H | -0.316934 | 3.212023  | -0.985866 | C  | -1.635322 | 1.396587  | 3.120655  |
| C | 1.524026  | 4.263183  | -0.916960 | H  | -1.939214 | 0.475736  | 2.612505  |
| H | 1.101178  | 5.042658  | -0.275591 | C  | -2.881227 | 2.265739  | 3.351559  |
| H | 2.026294  | 3.546977  | -0.259783 | H  | -3.598082 | 1.747065  | 3.997774  |
| H | 2.277459  | 4.734594  | -1.561829 | H  | -2.630071 | 3.215963  | 3.842960  |
| C | -0.325399 | 4.602784  | -2.623027 | H  | -3.391359 | 2.499528  | 2.409006  |
| H | -1.164394 | 4.138523  | -3.156595 | C  | -0.986593 | 0.985475  | 4.448622  |
| H | -0.726026 | 5.429876  | -2.026937 | H  | -0.079018 | 0.399312  | 4.285899  |
| H | 0.346686  | 5.039803  | -3.373889 | H  | -0.737762 | 1.851577  | 5.075789  |
| C | -1.145159 | -3.257416 | 1.594878  | H  | -1.675928 | 0.354992  | 5.018933  |
| H | -1.652591 | -2.698448 | 0.800885  | C  | -1.915928 | 1.193112  | -1.939446 |
| C | -2.180551 | -3.604852 | 2.677202  | H  | -2.709379 | 1.947766  | -1.895518 |
| H | -2.983005 | -4.221755 | 2.257579  | C  | -0.600638 | 1.948204  | -1.843647 |
| H | -1.732985 | -4.175466 | 3.502900  | O  | 0.485320  | 1.483823  | -1.523061 |
| H | -2.638396 | -2.703453 | 3.102862  | O  | -0.774000 | 3.233335  | -2.222366 |
| C | -0.537081 | -4.521904 | 0.975481  | C  | 0.347163  | 4.177763  | -2.386268 |
| H | -1.329456 | -5.145452 | 0.546926  | C  | -0.358494 | 5.443401  | -2.882566 |
| H | 0.151963  | -4.276829 | 0.164598  | H  | 0.370512  | 6.245000  | -3.042711 |
| H | -0.008625 | -5.136027 | 1.716852  | H  | -0.876510 | 5.251165  | -3.827643 |
| C | 0.911119  | -1.100041 | -3.814287 | H  | -1.096957 | 5.786742  | -2.150646 |
| H | 0.788444  | -1.865168 | -4.591480 | C  | 1.329071  | 3.657259  | -3.441534 |
| H | 0.154801  | -0.326729 | -3.978767 | H  | 2.076497  | 4.429286  | -3.656865 |
| H | 1.899754  | -0.646383 | -3.942690 | H  | 1.843736  | 2.759050  | -3.097111 |
| C | 2.124616  | -3.237308 | -1.981736 | H  | 0.799775  | 3.428380  | -4.372968 |
| H | 1.964432  | -3.981430 | -2.771243 | C  | 1.026835  | 4.430927  | -1.036324 |
| H | 3.118334  | -2.798292 | -2.116972 | H  | 1.771736  | 5.227909  | -1.142112 |
| H | 2.116284  | -3.760632 | -1.021600 | H  | 0.286513  | 4.758210  | -0.296910 |
| O | -0.654375 | -2.853051 | -2.069425 | H  | 1.525415  | 3.532473  | -0.669859 |
| C | -1.950700 | -2.318676 | -2.345428 | Si | 0.461236  | -2.073225 | 1.966165  |
| C | -2.947805 | -3.464383 | -2.429689 | C  | 0.588935  | -3.849945 | 1.288425  |
| H | -1.938221 | -1.765671 | -3.297885 | H  | -0.114417 | -4.031785 | 0.470471  |

|                           |           |                |           |                           |           |                |           |
|---------------------------|-----------|----------------|-----------|---------------------------|-----------|----------------|-----------|
| H                         | -2.229825 | -1.614646      | -1.555179 | H                         | 1.601968  | -4.056039      | 0.926360  |
| H                         | -3.954324 | -3.074607      | -2.619595 | H                         | 0.367594  | -4.565223      | 2.091080  |
| H                         | -2.679316 | -4.157745      | -3.234485 | C                         | 1.716854  | -1.928342      | 3.382333  |
| H                         | -2.967019 | -4.025899      | -1.488994 | H                         | 1.489923  | -2.677007      | 4.150973  |
| C                         | 1.494033  | 1.702484       | 3.366442  | H                         | 2.734058  | -2.106169      | 3.015968  |
| H                         | 2.330391  | 1.834212       | 4.063083  | H                         | 1.704438  | -0.942690      | 3.855757  |
| H                         | 1.473395  | 0.654206       | 3.051292  | O                         | -1.049017 | -1.934004      | 2.745763  |
| H                         | 1.664627  | 2.324804       | 2.487204  | C                         | -2.248557 | -2.468245      | 2.182436  |
| C                         | 0.124465  | 3.567731       | 4.420137  | H                         | -2.458901 | -1.978413      | 1.225422  |
| H                         | 0.243868  | 4.187841       | 3.530209  | H                         | -2.122906 | -3.543736      | 1.982467  |
| H                         | -0.832182 | 3.810254       | 4.896298  | C                         | -3.393750 | -2.269970      | 3.165265  |
| H                         | 0.926845  | 3.809728       | 5.126578  | H                         | -4.320325 | -2.690254      | 2.756825  |
| C                         | -0.030402 | 1.218213       | 5.314930  | H                         | -3.175605 | -2.763832      | 4.118858  |
| H                         | -0.011169 | 0.152690       | 5.060635  | H                         | -3.561127 | -1.205518      | 3.361989  |
| H                         | 0.758982  | 1.413507       | 6.048800  | H                         | -2.952322 | 0.027596       | -3.450453 |
| H                         | -0.997655 | 1.441347       | 5.776814  | C                         | -1.984031 | 0.520432       | -3.324308 |
| C                         | -3.533962 | 0.617598       | -0.560543 | H                         | -1.199654 | -0.230738      | -3.425527 |
| C                         | -4.091399 | 1.215466       | -1.696605 | H                         | -1.867871 | 1.260716       | -4.124132 |
| C                         | -4.217192 | -0.457470      | 0.027613  | C                         | -3.578873 | -0.353464      | -0.840942 |
| C                         | -5.297901 | 0.757118       | -2.235211 | C                         | -3.815533 | -1.676496      | -1.231076 |
| H                         | -3.573949 | 2.049927       | -2.166673 | C                         | -4.680010 | 0.460668       | -0.542171 |
| C                         | -5.423172 | -0.915942      | -0.500862 | C                         | -5.118083 | -2.171542      | -1.327216 |
| H                         | -3.782312 | -0.942751      | 0.897026  | H                         | -2.956369 | -2.306307      | -1.436972 |
| C                         | -5.969222 | -0.309825      | -1.637433 | C                         | -5.984064 | -0.029101      | -0.634898 |
| H                         | -5.710723 | 1.233827       | -3.121144 | H                         | -4.516133 | 1.489436       | -0.223173 |
| H                         | -5.939184 | -1.748879      | -0.029038 | C                         | -6.208014 | -1.350107      | -1.031034 |
| H                         | -6.908487 | -0.667617      | -2.051449 | H                         | -5.282817 | -3.203251      | -1.630098 |
| C                         | -3.415437 | 3.052527       | 1.277748  | H                         | -6.824327 | 0.617049       | -0.391599 |
| H                         | -2.958982 | 3.811870       | 0.633511  | H                         | -7.221894 | -1.736199      | -1.101113 |
| H                         | -4.379480 | 2.766838       | 0.847293  | C                         | -2.138559 | 0.182978       | -0.743222 |
| H                         | -3.602330 | 3.510487       | 2.256224  | H                         | -2.123780 | 0.820909       | 0.164838  |
| H                         | -2.947382 | 1.088906       | 2.073076  | O                         | -1.210642 | -0.825812      | -0.685339 |
| Total SCF energy          |           | -2078.08901263 |           | Total SCF energy          |           | -2078.08959296 |           |
| Gibbs free energy at 298K |           | -2077.33497700 |           | Gibbs free energy at 298K |           | -2077.33327700 |           |
| Free energy in solution   |           | -2078.05134400 |           | Free energy in solution   |           | -2078.05315800 |           |
